# Supplementary material for: Synthesis of 2-carboxyaniline-substituted maleimides from 2′-nitrochalcones
Source: Royal Society of Chemistry journal article supplement (doi:10.1039/d3ob00197k), 2023-01-01
Supplement: d3ob00197k1.pdf [file d3ob00197k1.pdf]

Electronic Supplementary Material (ESI)

## Synthesis of 2-carboxyaniline-substituted maleimides from 2'-nitrochalcones

Nicolai A. Aksenov,\* Dmitrii A. Aksenov, Daniil D. Ganusenko, Igor A. Kurenkov, Alexander V. Leontiev and Alexander V. Aksenov  
Aksenov

*Department of Chemistry, North Caucasus Federal University, 1a Pushkin St., Stavropol 355017, Russian Federation*

### Supporting Information

|                                                                                                                                                             |     |
|-------------------------------------------------------------------------------------------------------------------------------------------------------------|-----|
| NMR Spectral Charts.....                                                                                                                                    | S2  |
| <sup>1</sup> H and <sup>13</sup> C Spectral Charts for starting chalcones ( <b>1</b> ).....                                                                 | S2  |
| <sup>1</sup> H and <sup>13</sup> C Spectral Charts for 2-((2,5-dioxo-4-aryl-2,5-dihydro-1H-pyrrol-3-yl)amino)benzoic acids ( <b>4</b> ) .....               | S25 |
| <sup>1</sup> H and <sup>13</sup> C Spectral Charts for (Z)-2-((3-amino-1-cyano-3-oxo-2-(p-tolyl)prop-1-en-1-yl)amino)benzoic acid ( <b>10b</b> ).....       | S63 |
| <sup>1</sup> H and <sup>13</sup> C Spectral Charts for acetic 2-(6-cyano-2-methyl-4-oxo-5-(p-tolyl)pyrimidin-1(4H)-yl)benzoic anhydride ( <b>11b</b> )..... | S65 |
| <sup>1</sup> H and <sup>13</sup> C Spectral Charts for 2-((2,5-dioxo-4-phenyl-2,5-dihydro-1H-pyrrol-3-yl)amino)-N-methylbenzamide ( <b>12</b> ).....        | S67 |
| <sup>1</sup> H and <sup>13</sup> C Spectral Charts for methyl 2-((2,5-dioxo-4-phenyl-2,5-dihydro-1H-pyrrol-3-yl)amino)benzoate ( <b>13</b> ).....           | S69 |
| <sup>1</sup> H and <sup>13</sup> C Spectral Charts for methyl 2-((1-methyl-2,5-dioxo-4-phenyl-2,5-dihydro-1H-pyrrol-3-yl)amino)benzoate ( <b>14</b> ).....  | S71 |
| <sup>1</sup> H and <sup>13</sup> C Spectral Charts for 3-(4-chlorophenyl)-4-(phenylamino)-1H-pyrrole-2,5-dione ( <b>15</b> ).....                           | S73 |
| X-Ray Crystallography data for 2-((2,5-dioxo-4-aryl-2,5-dihydro-1H-pyrrol-3-yl)amino)benzoic acid ( <b>4a</b> ) .....                                       | S75 |
| References.....                                                                                                                                             | S83 |

$^1\text{H}$  and  $^{13}\text{C}$  Spectral Charts for starting chalcones (**1**)

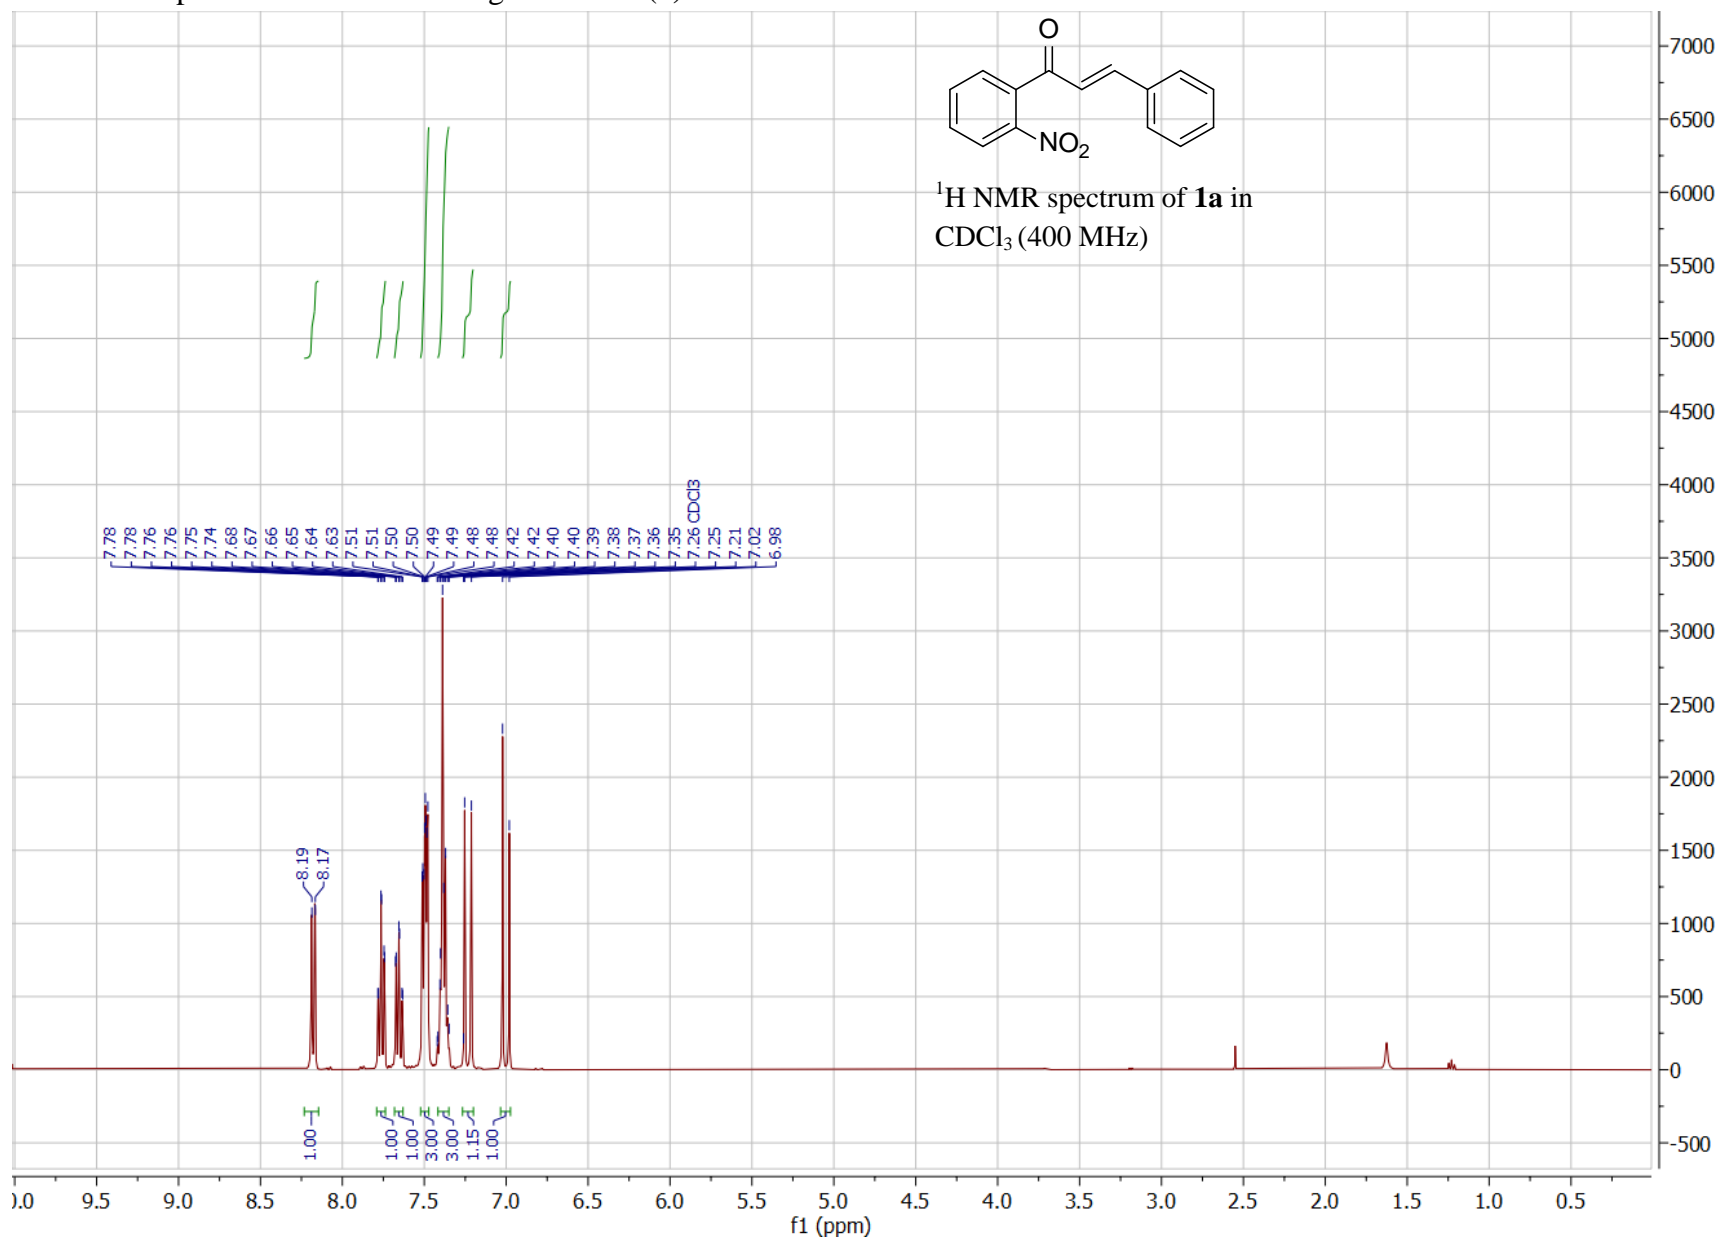

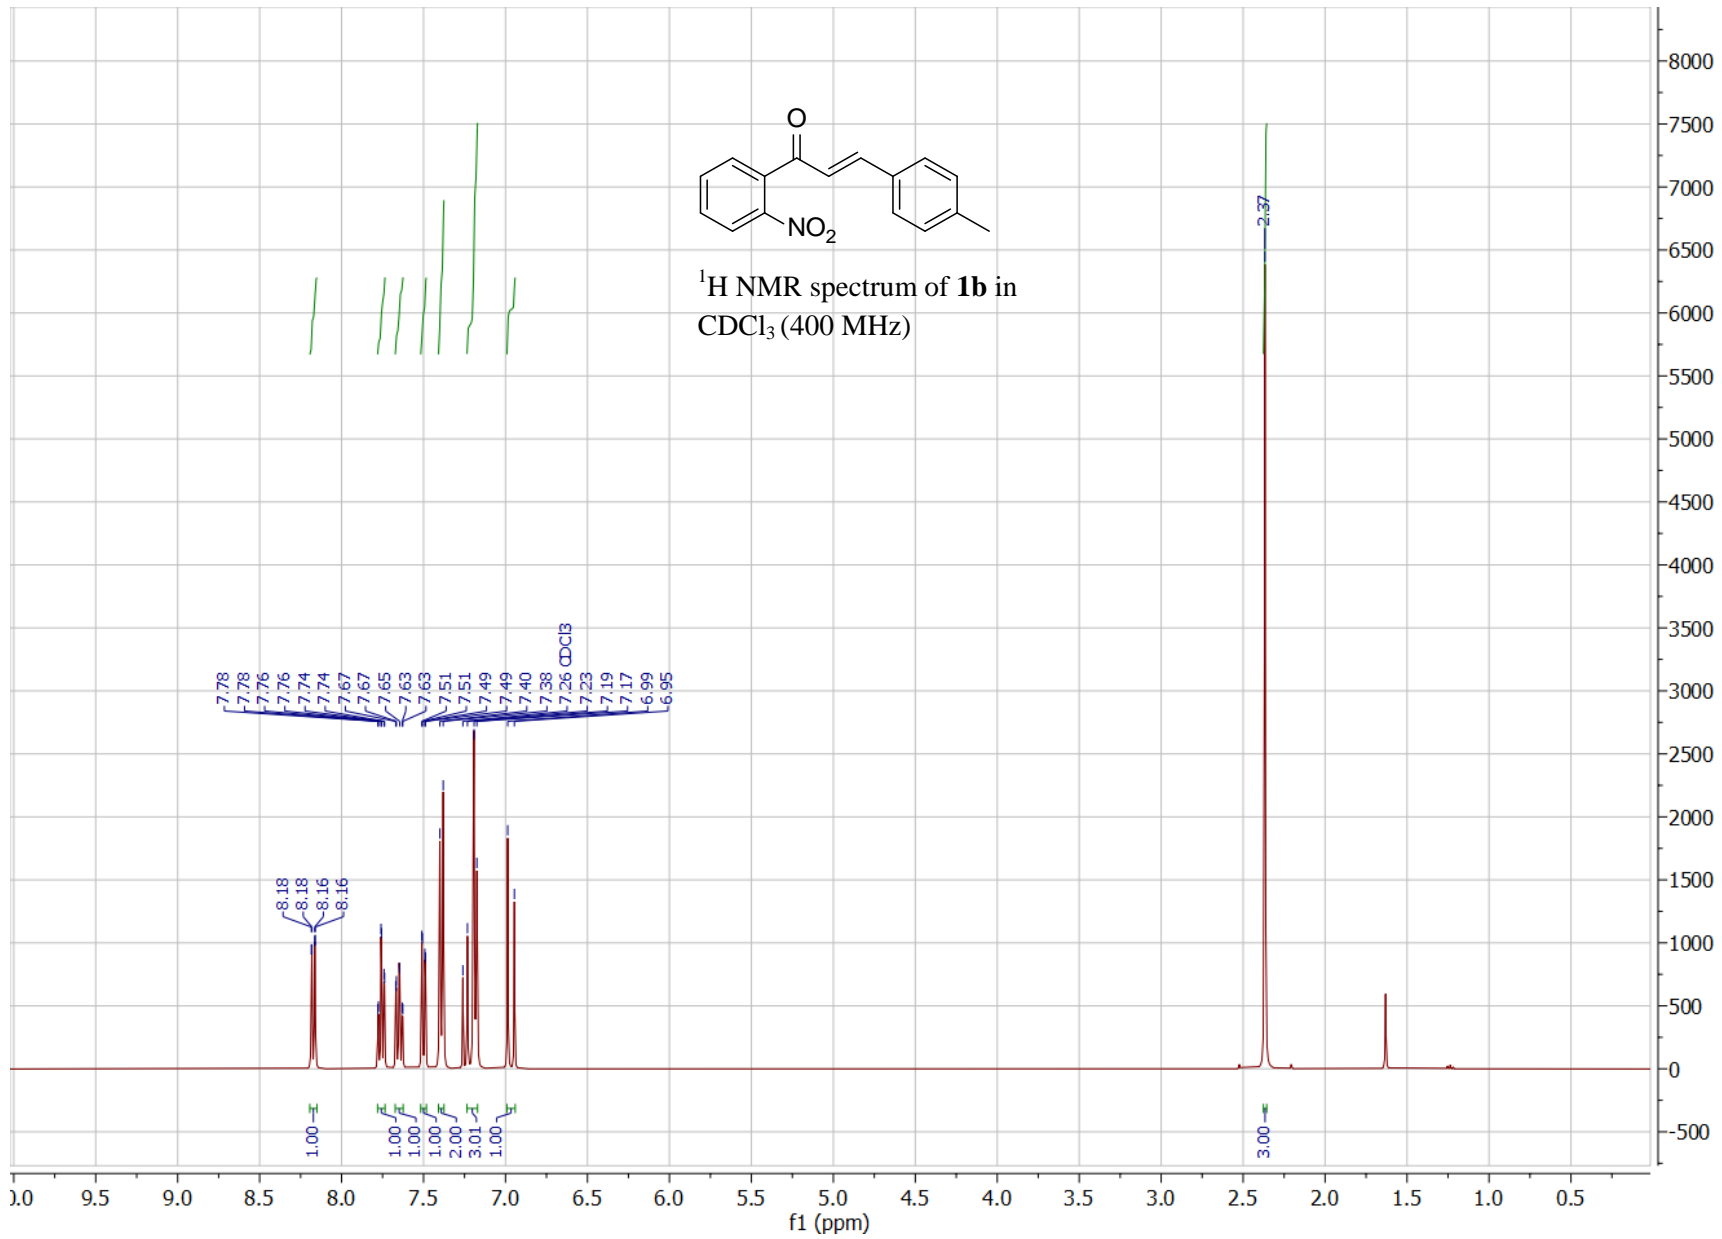

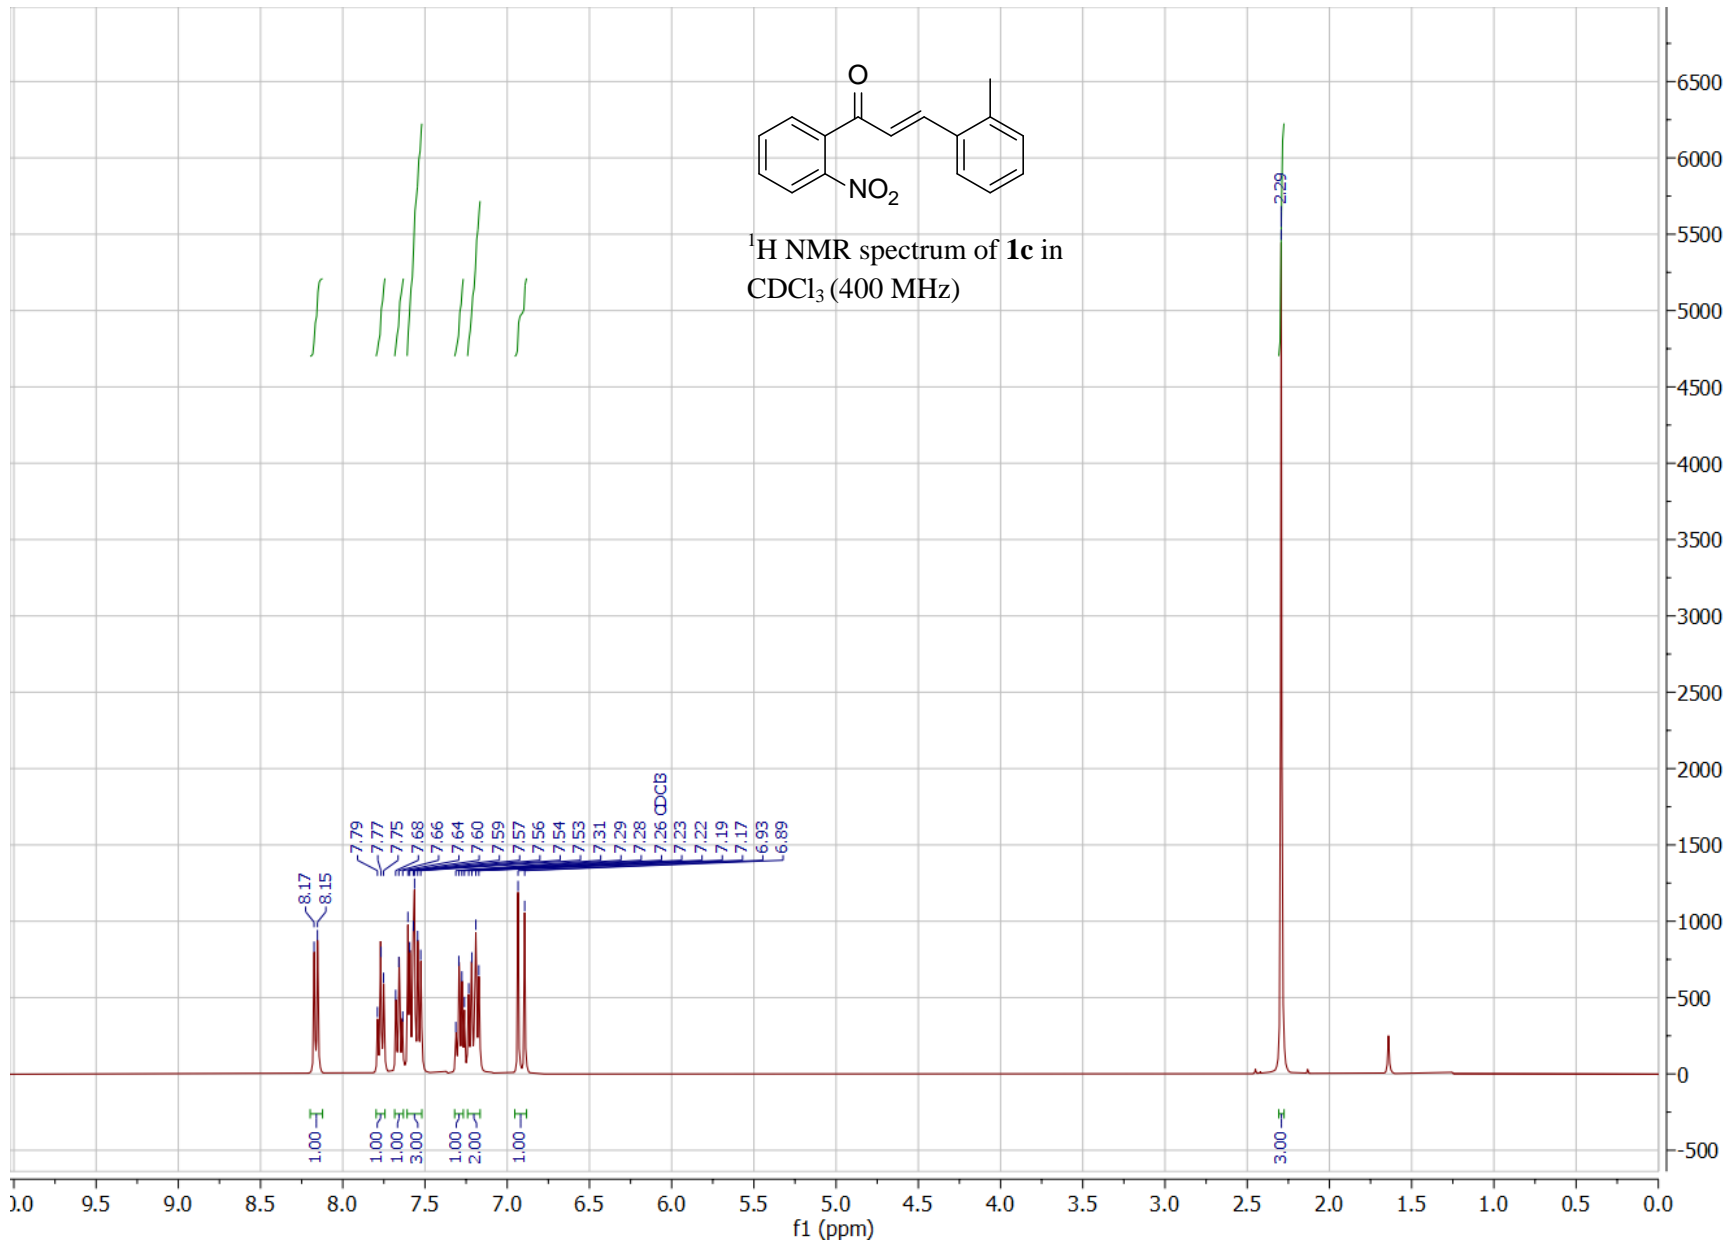

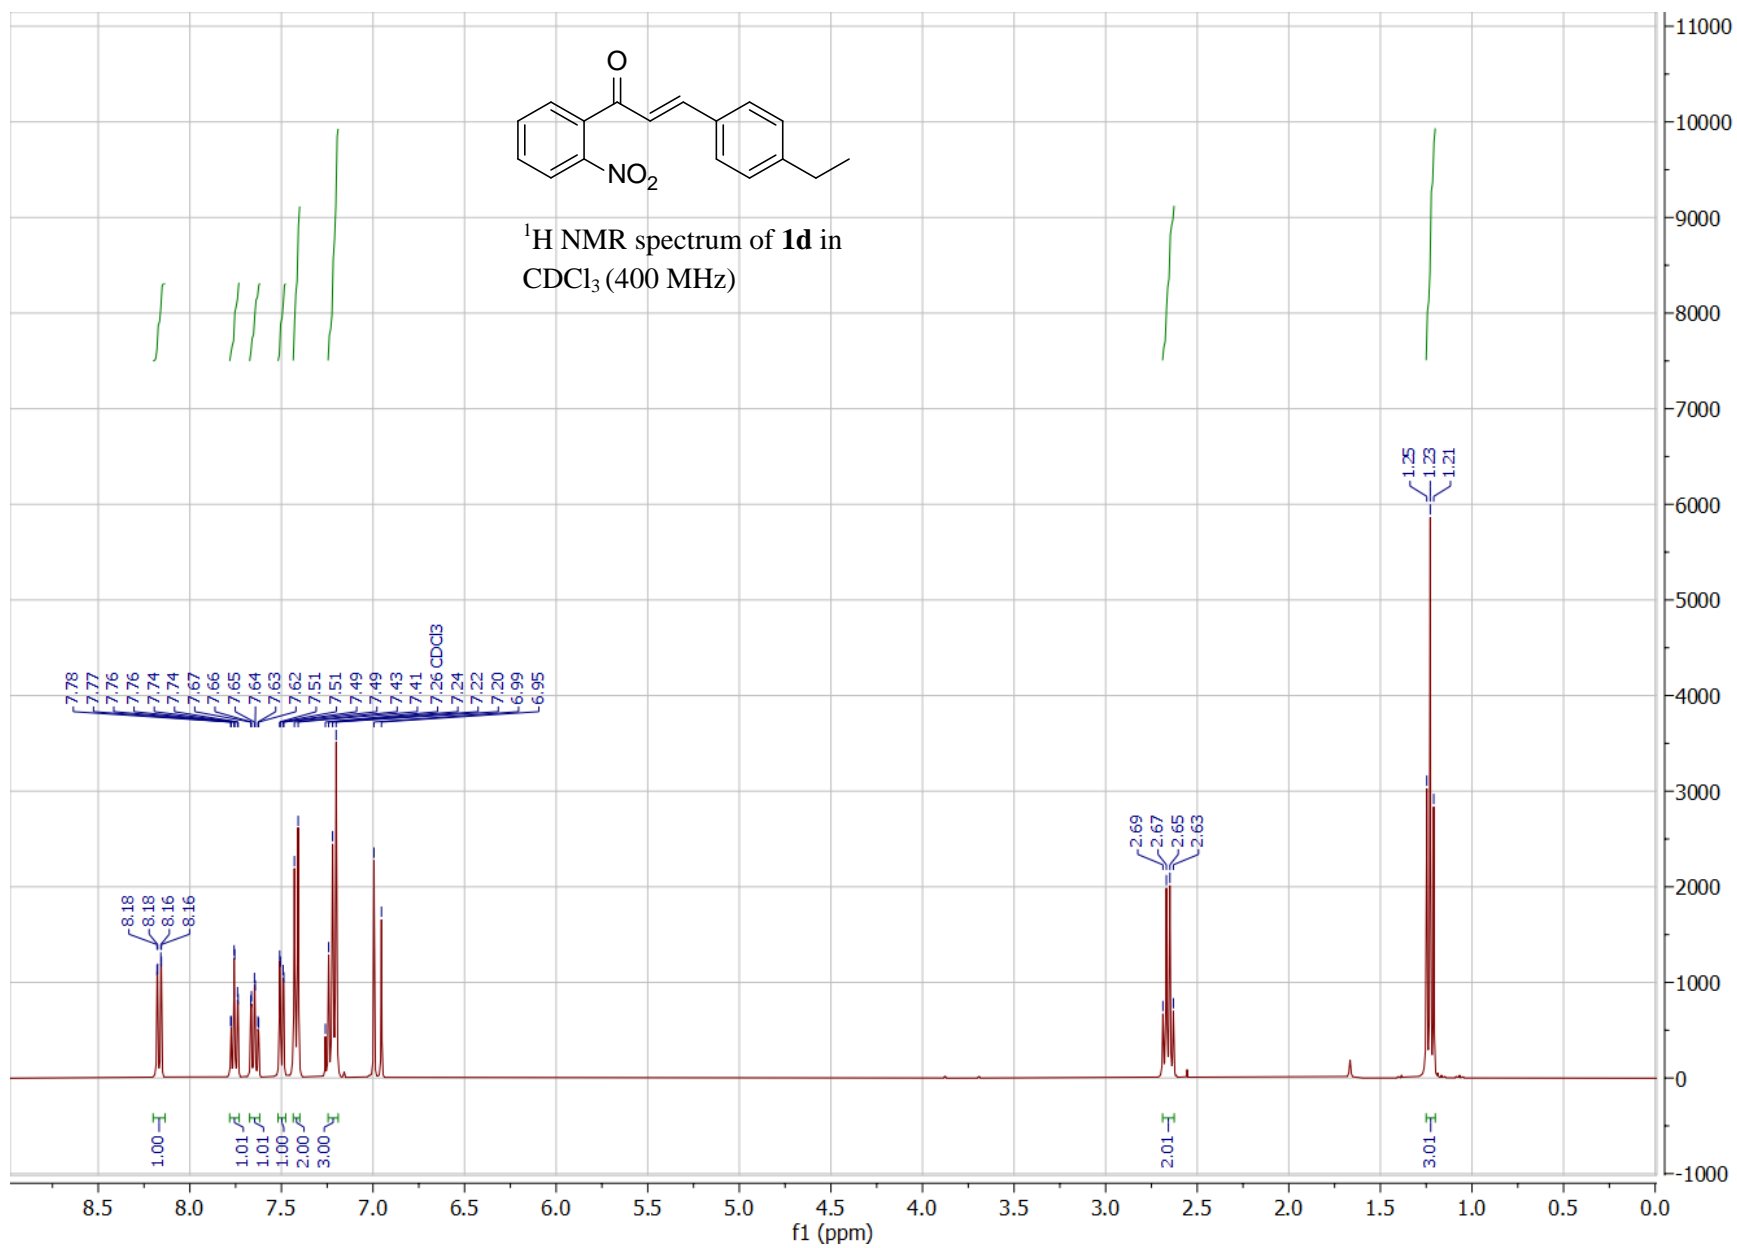

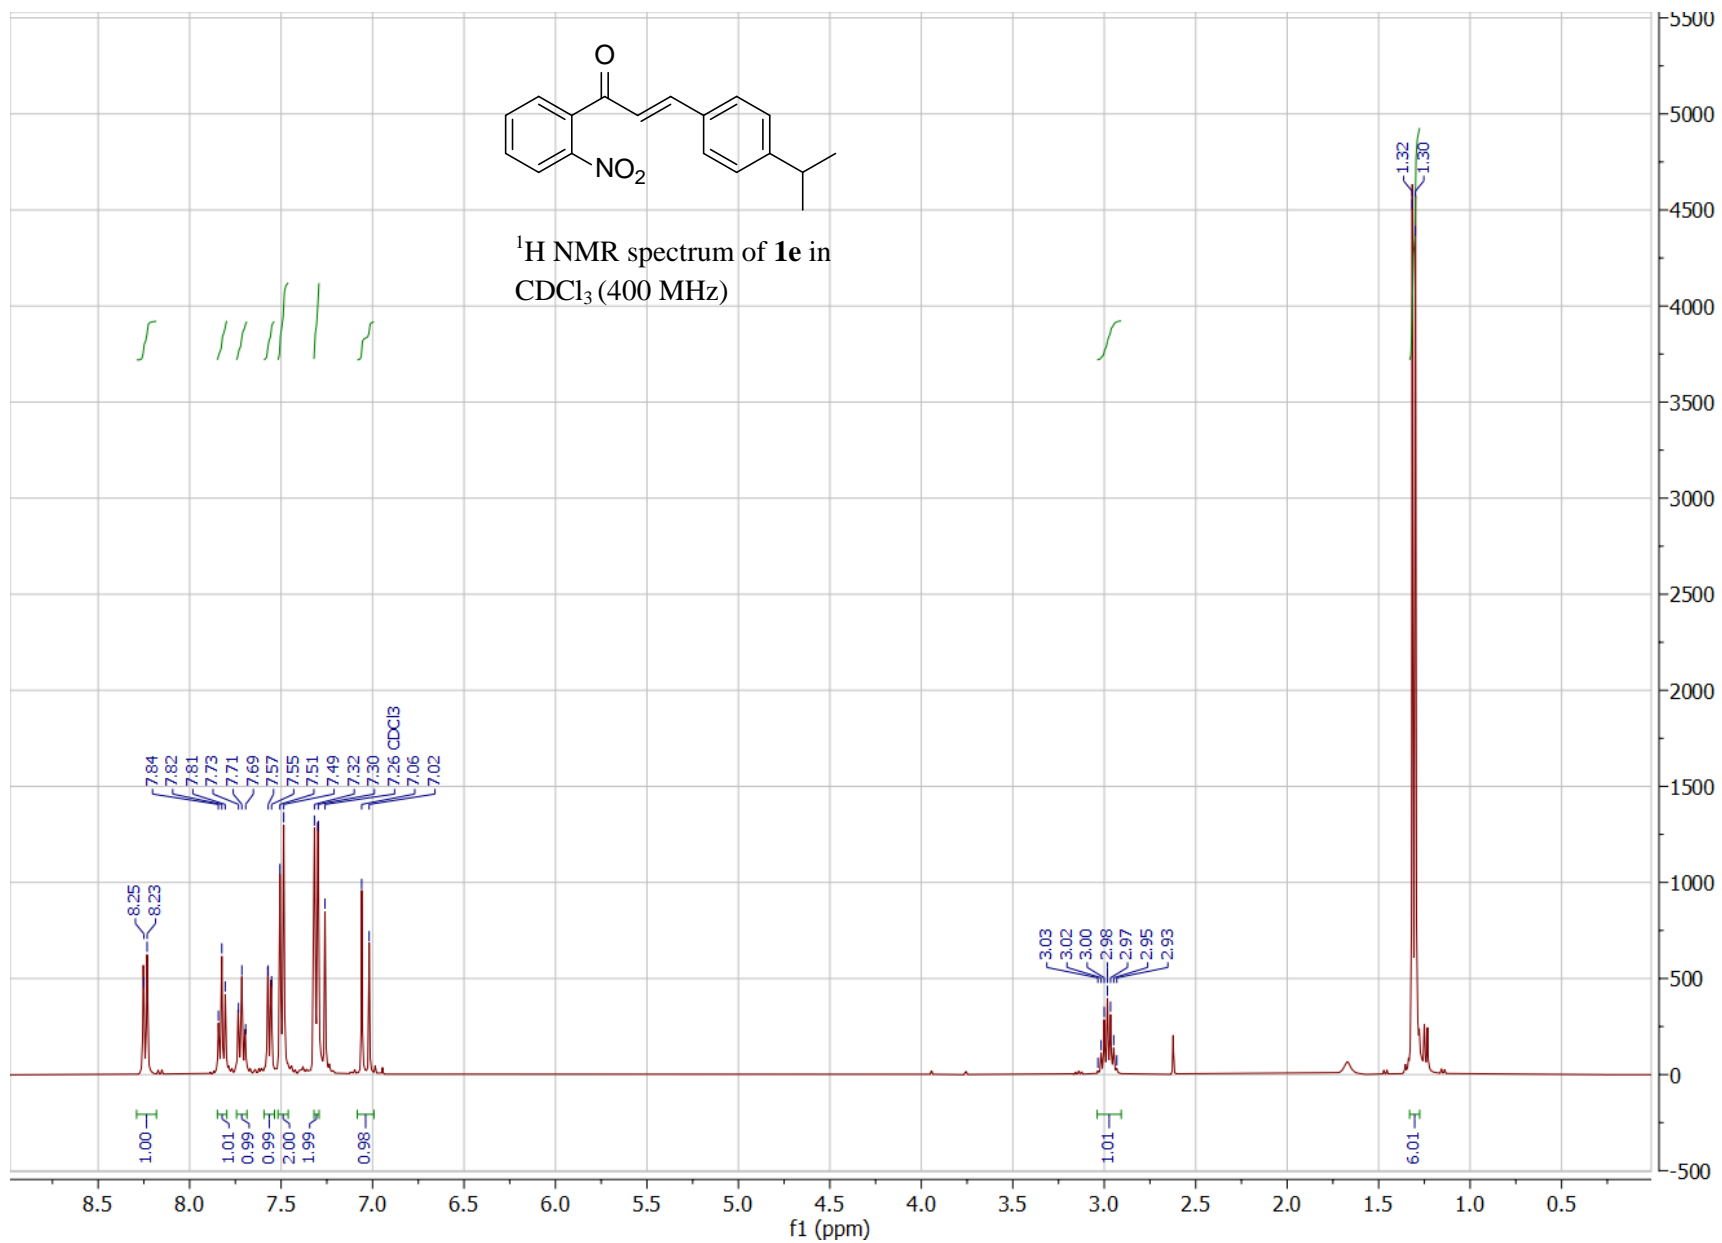

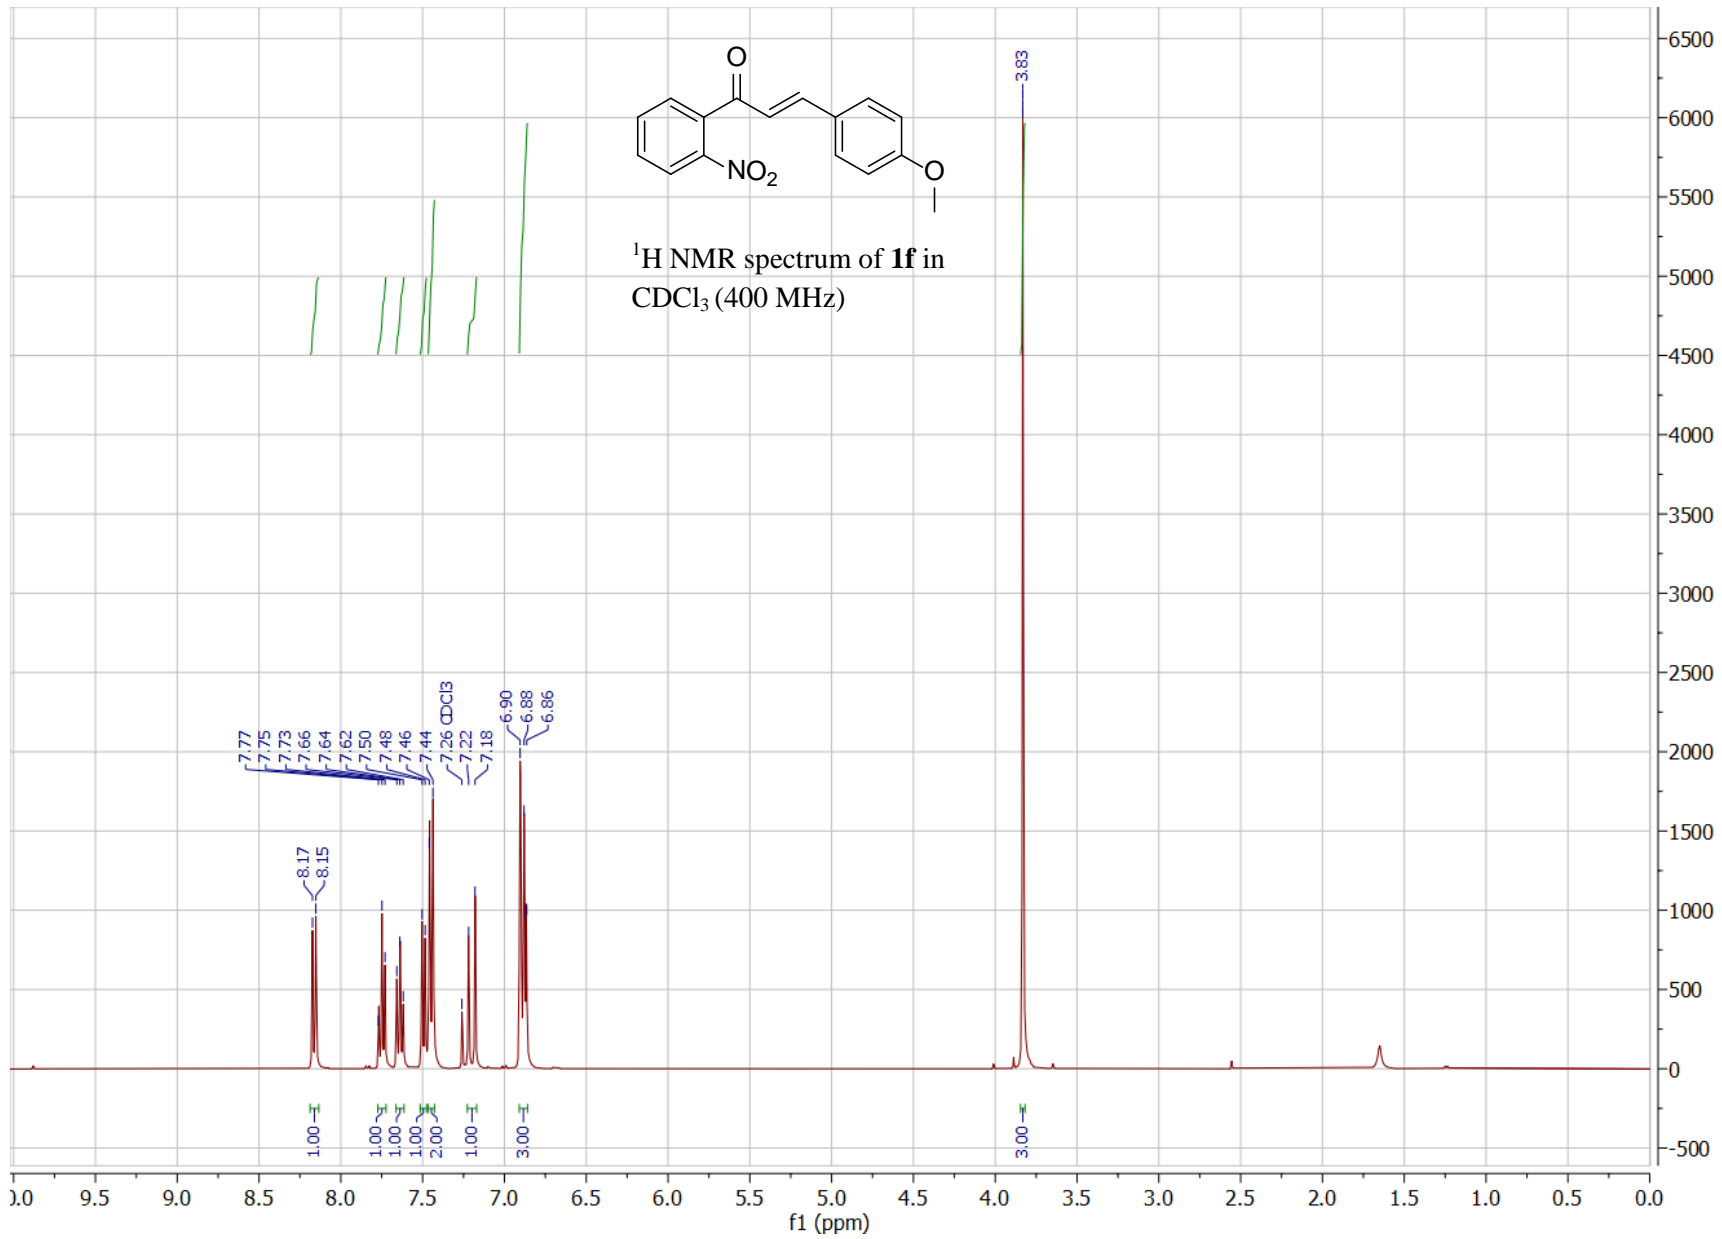

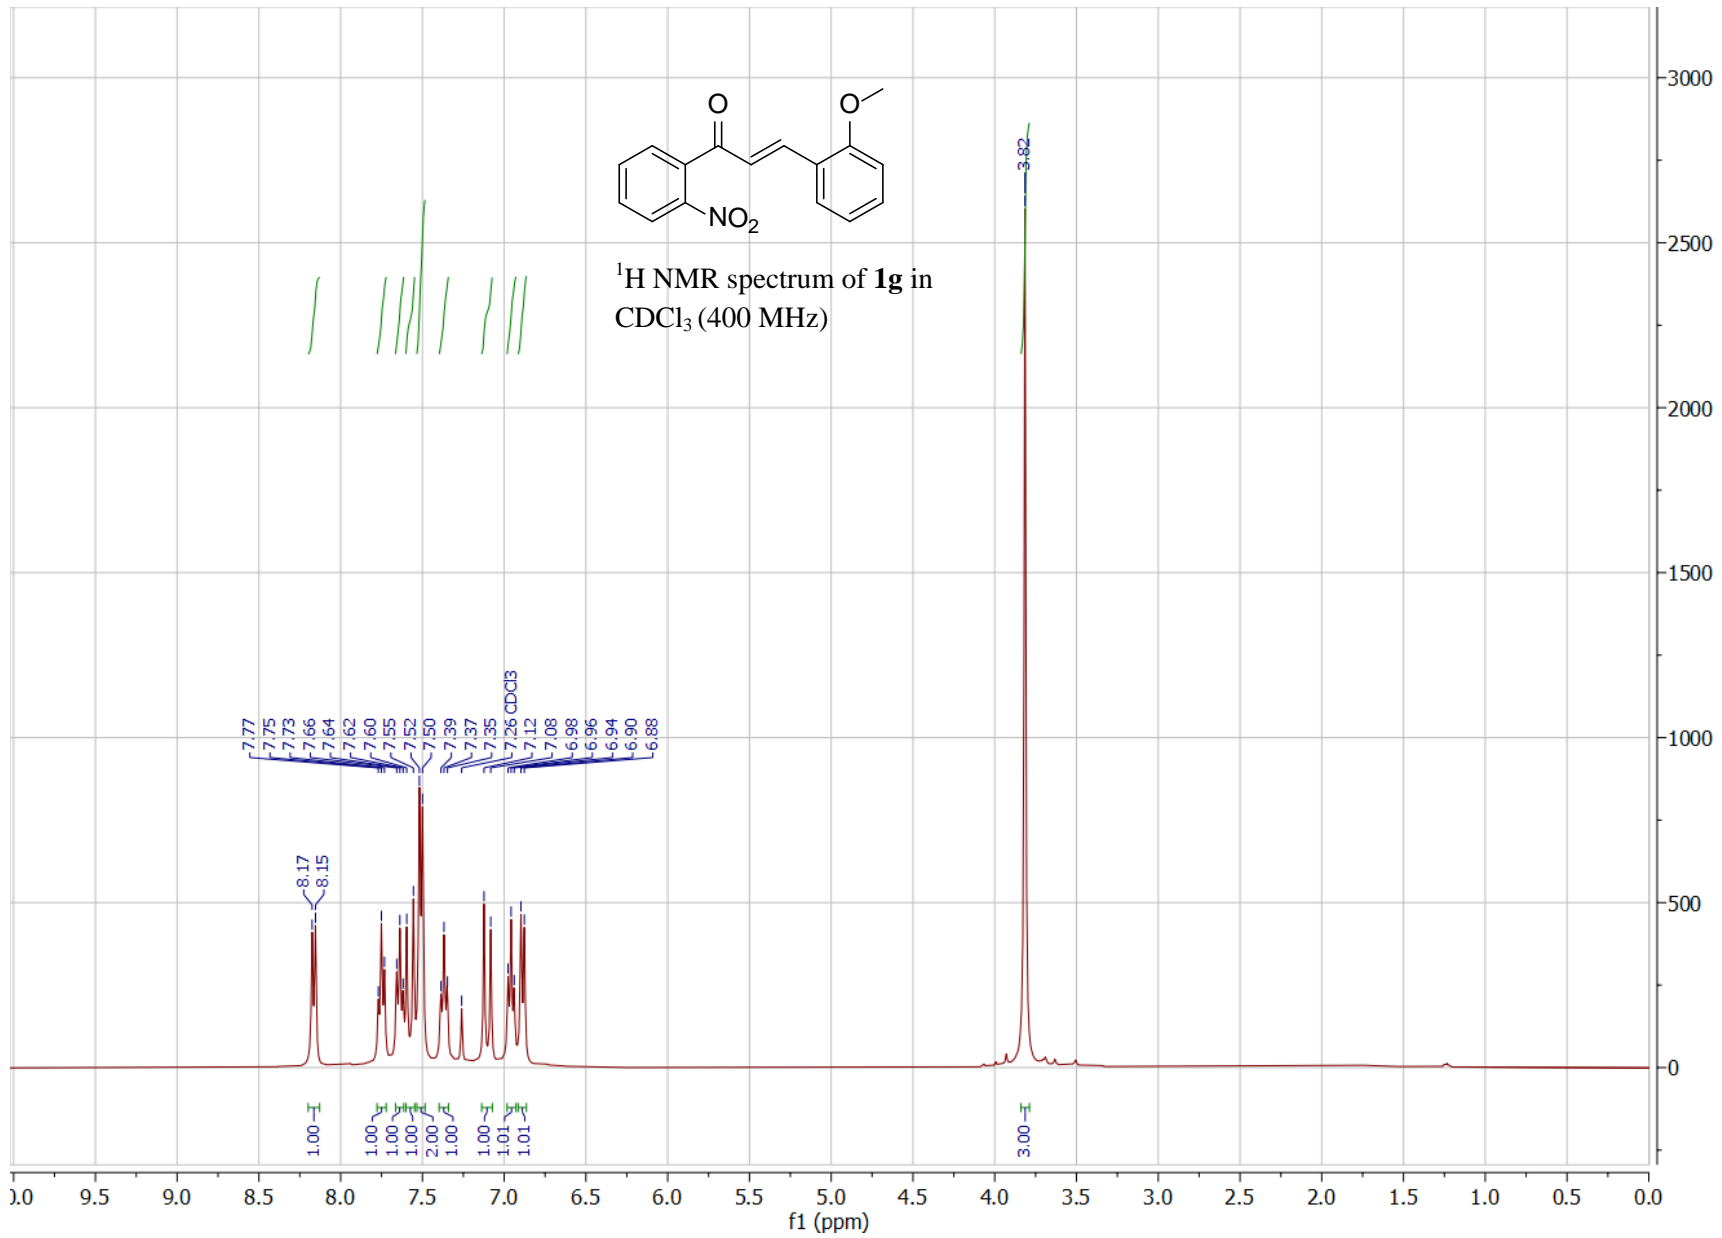



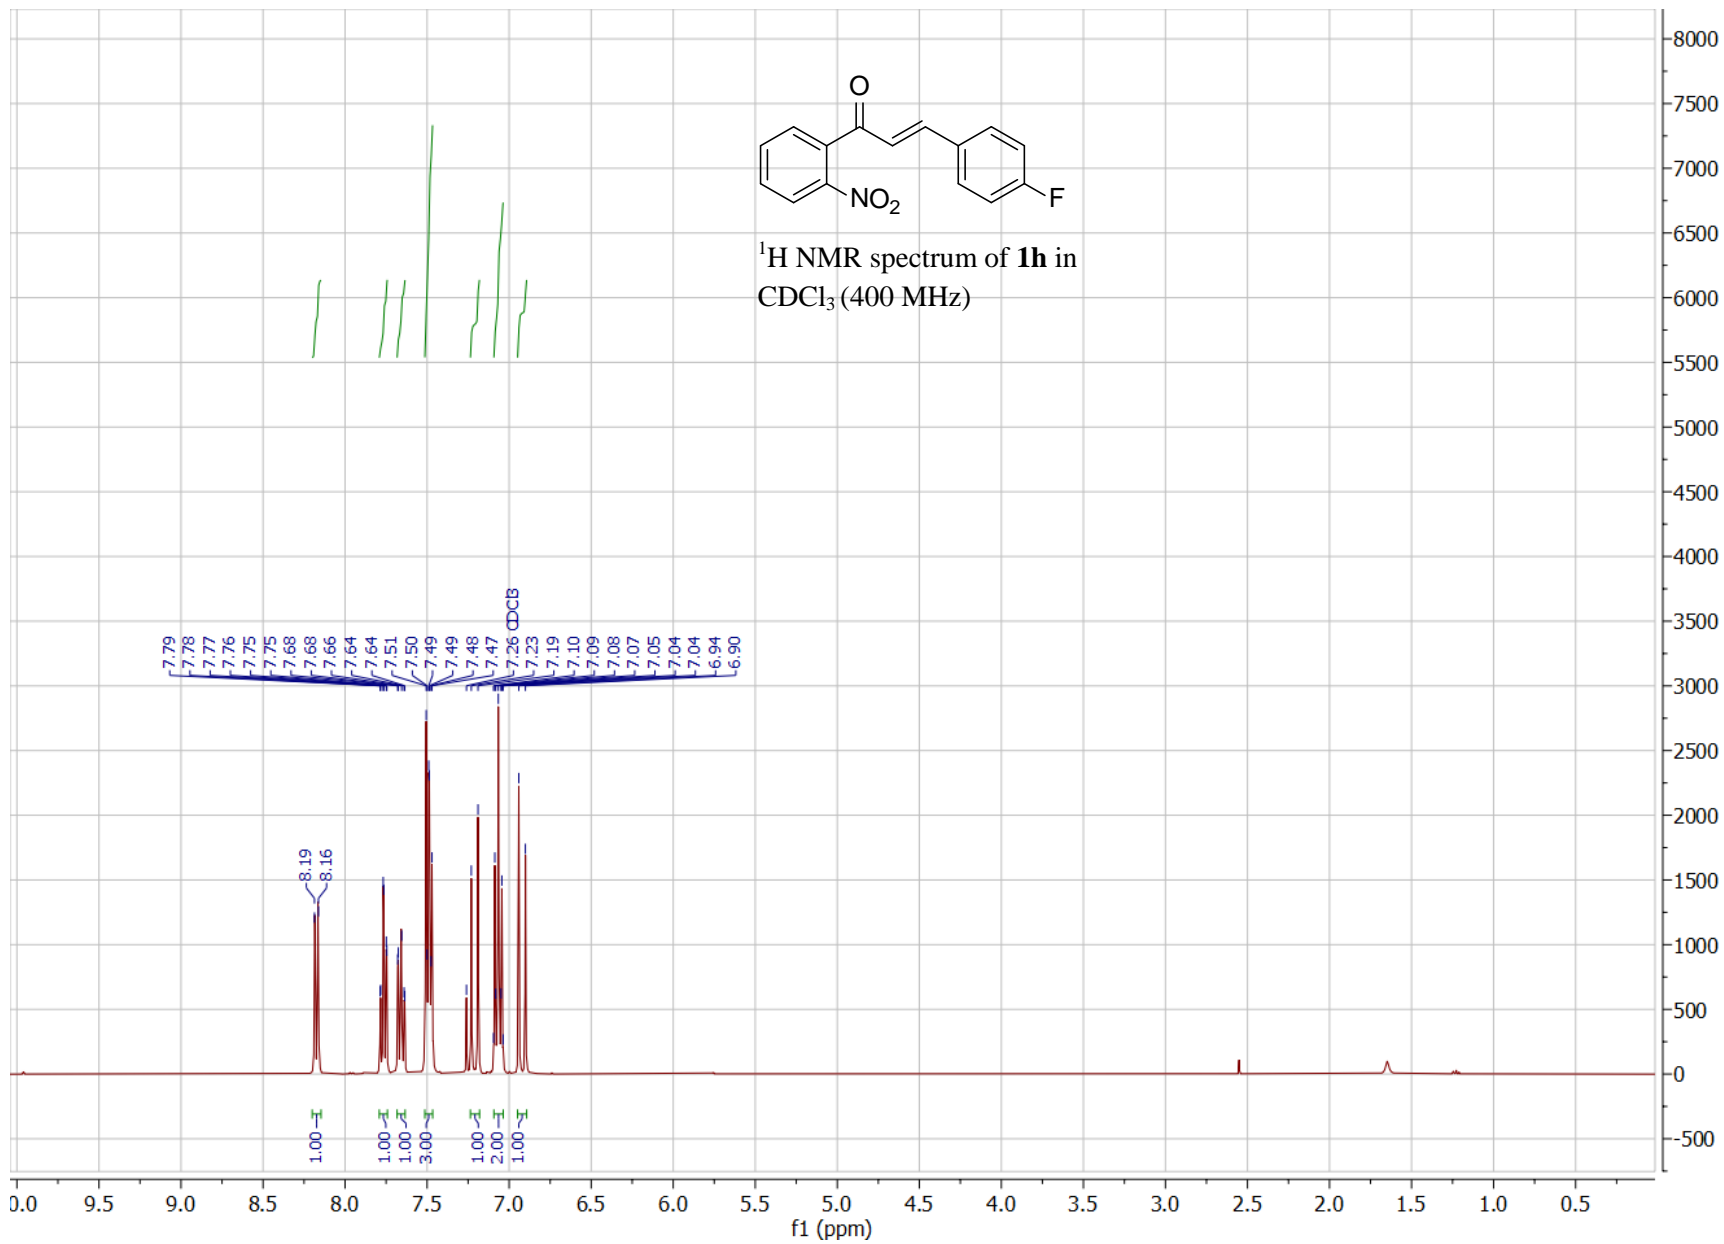

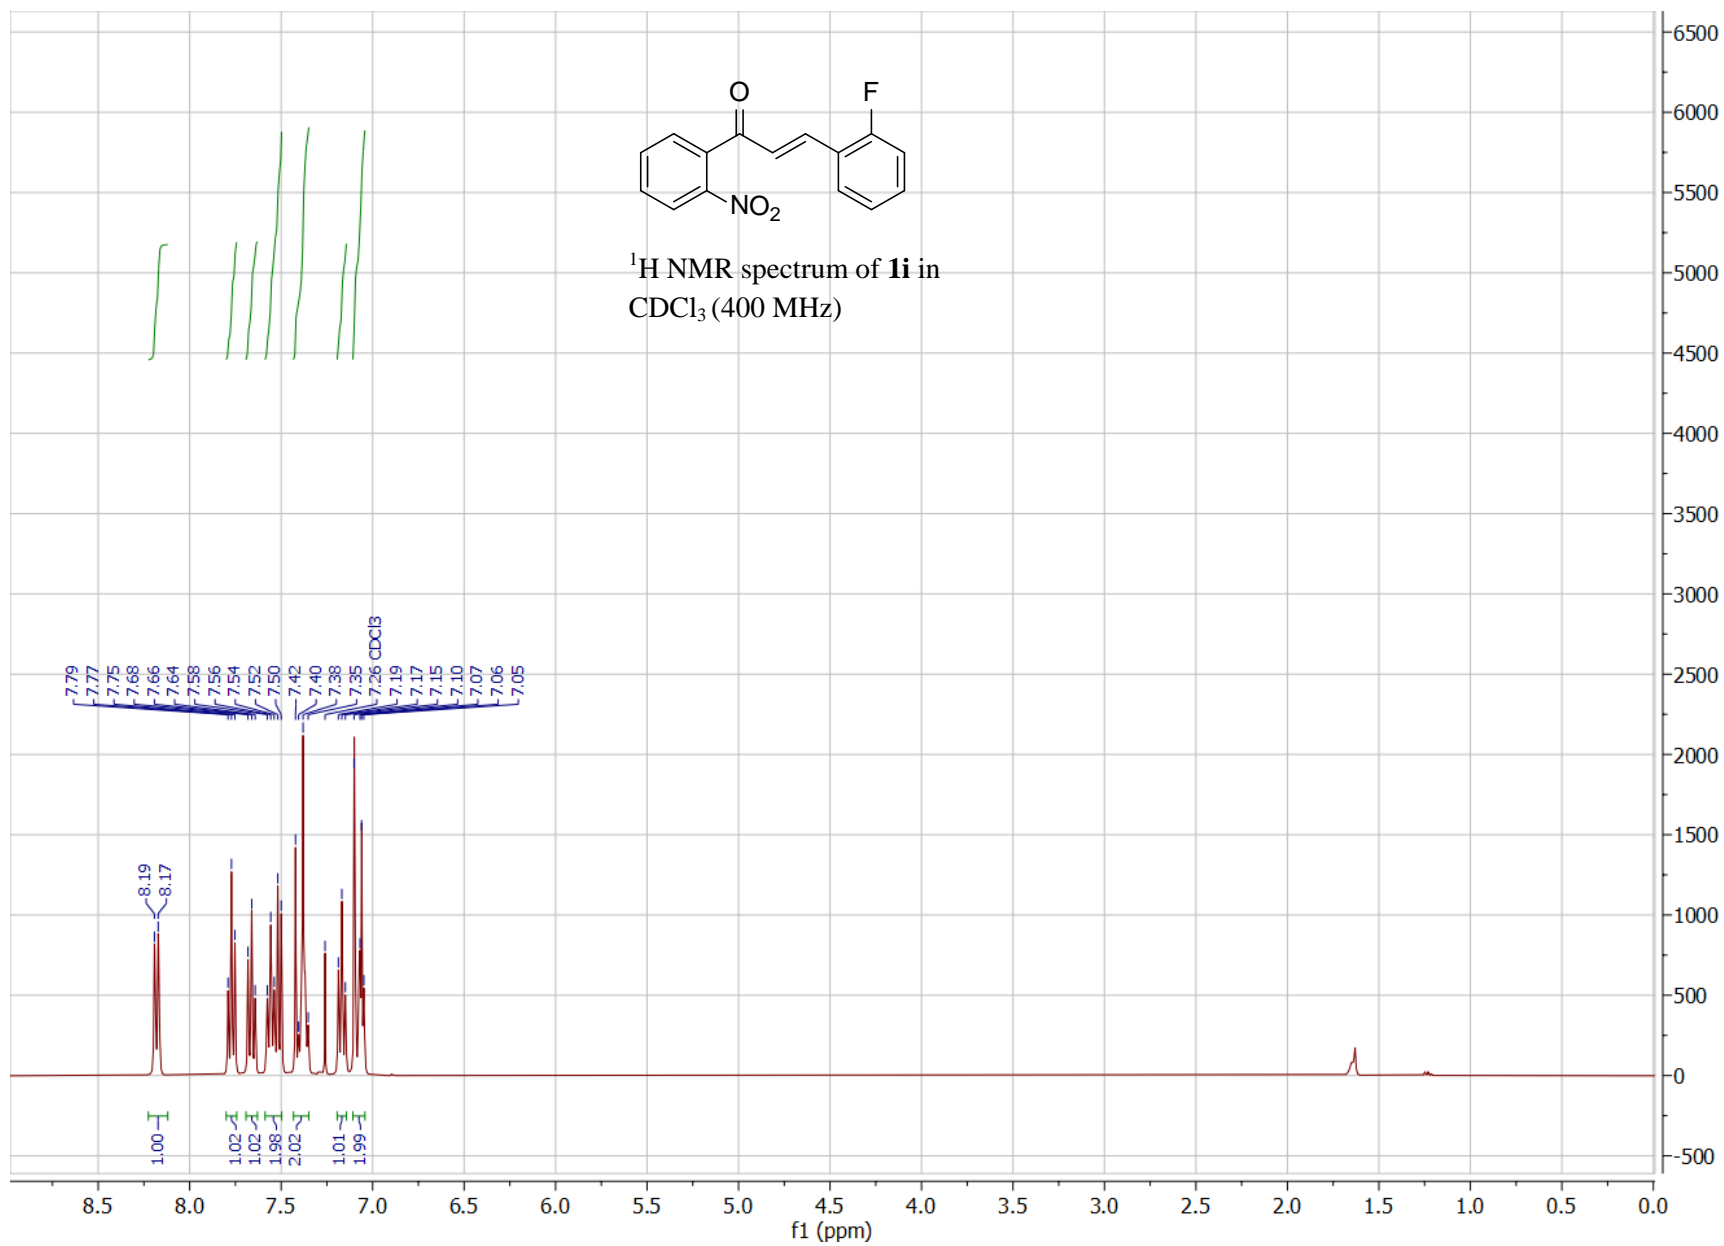

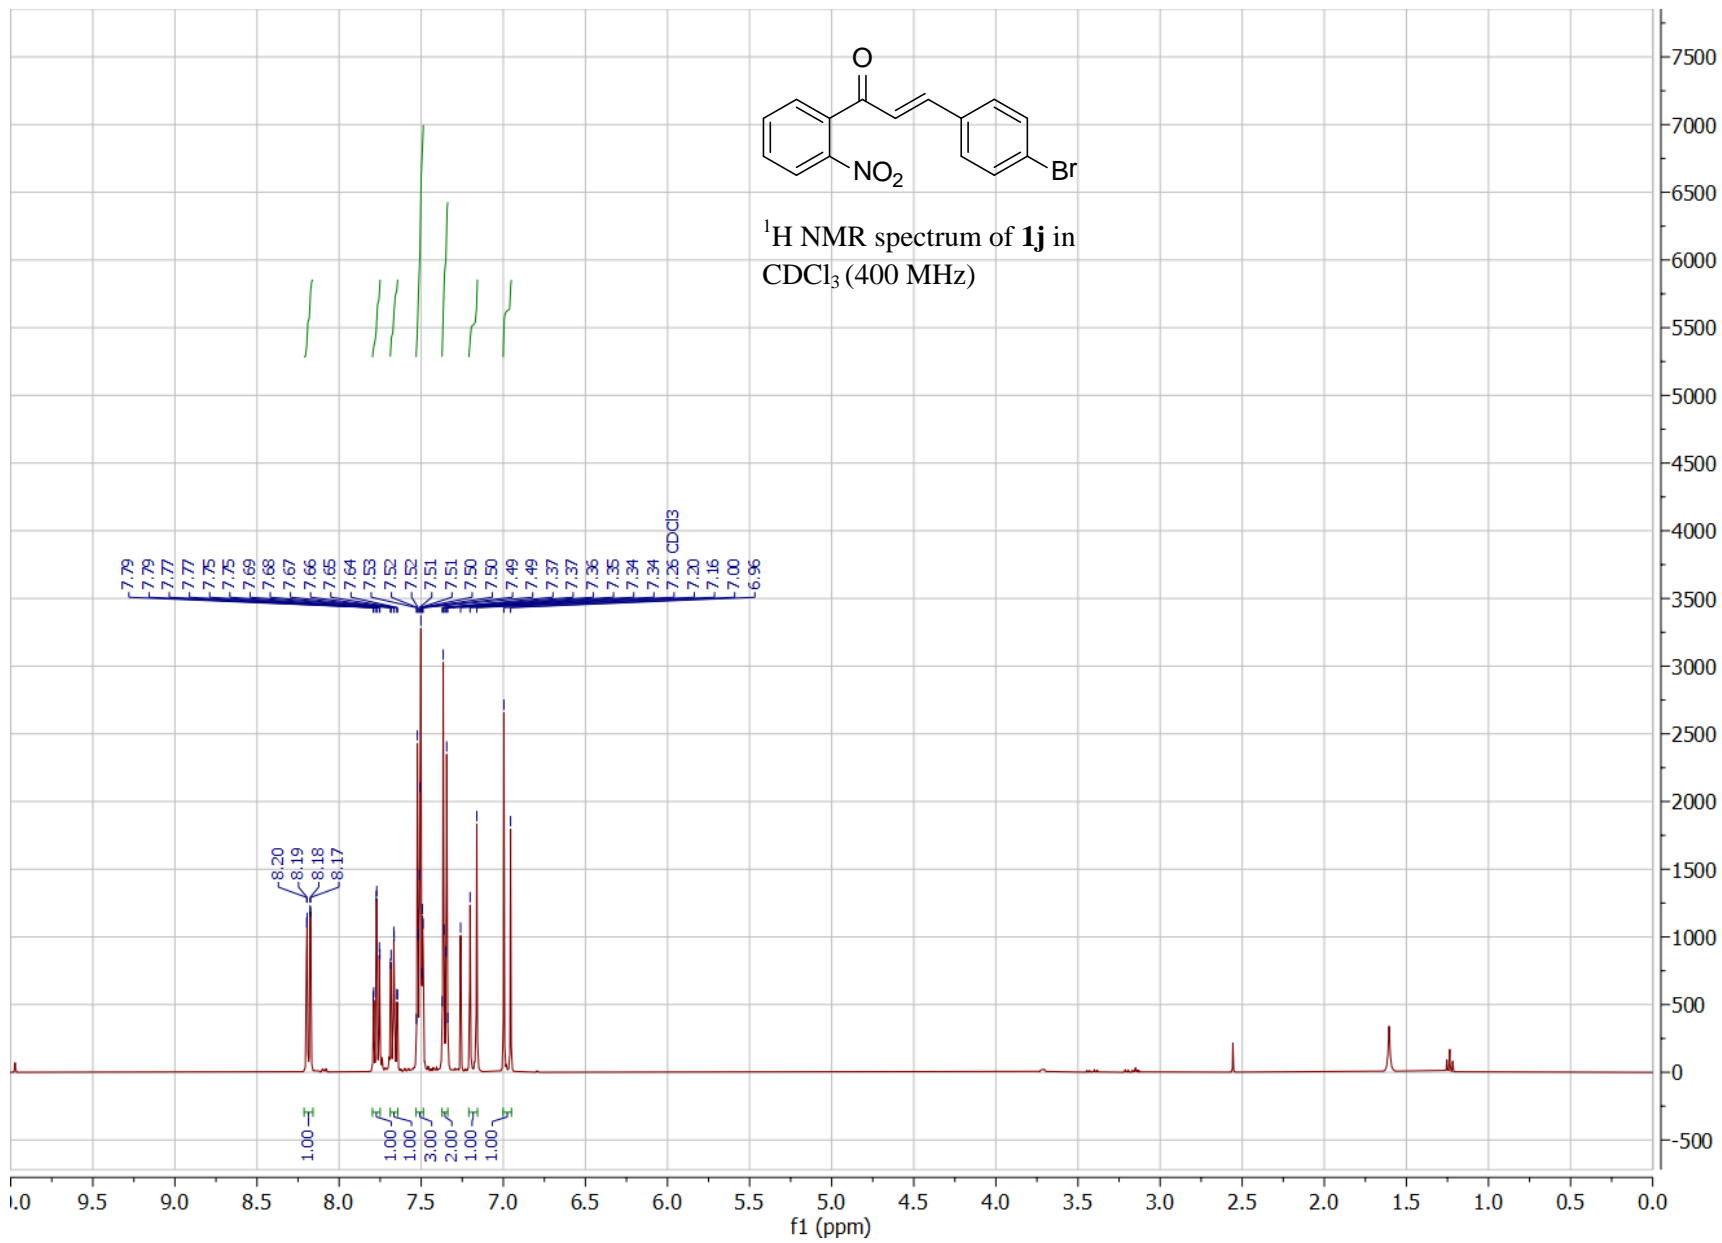

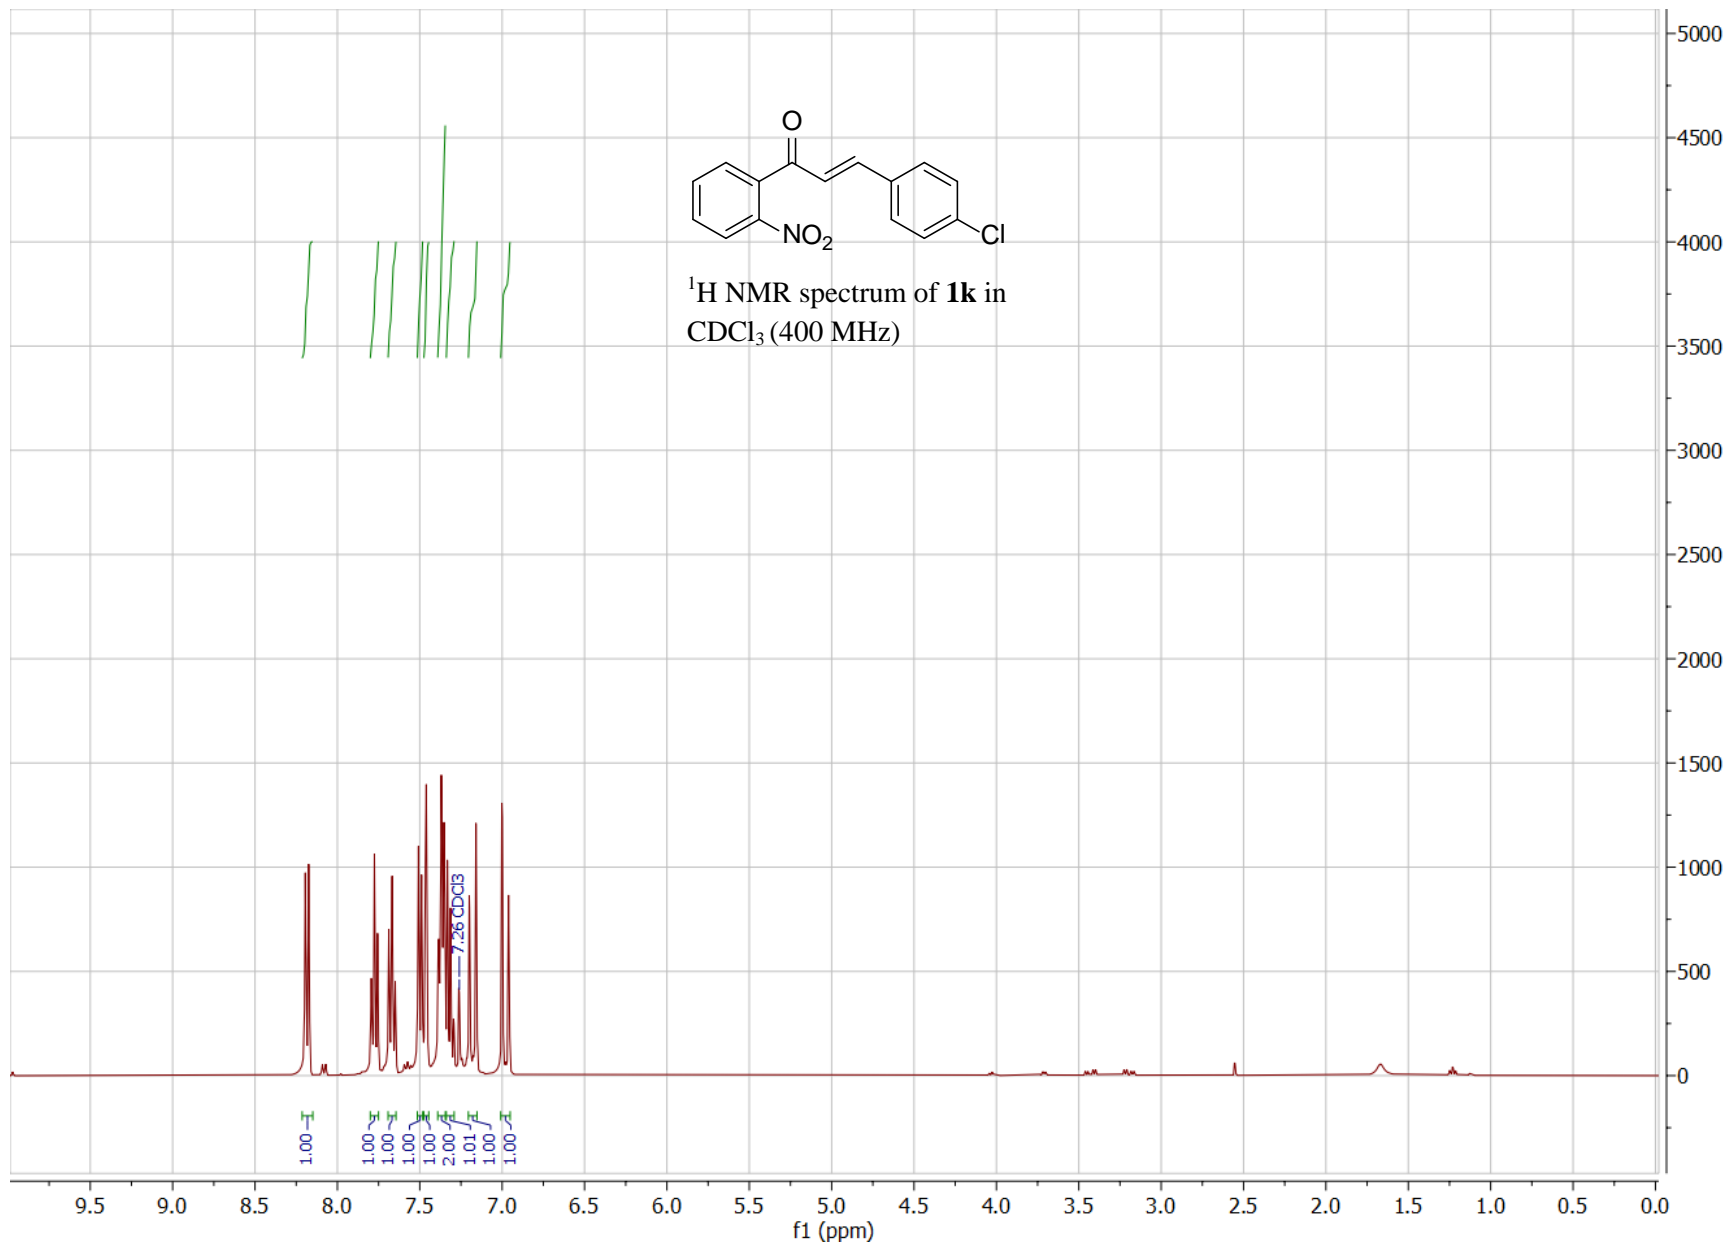

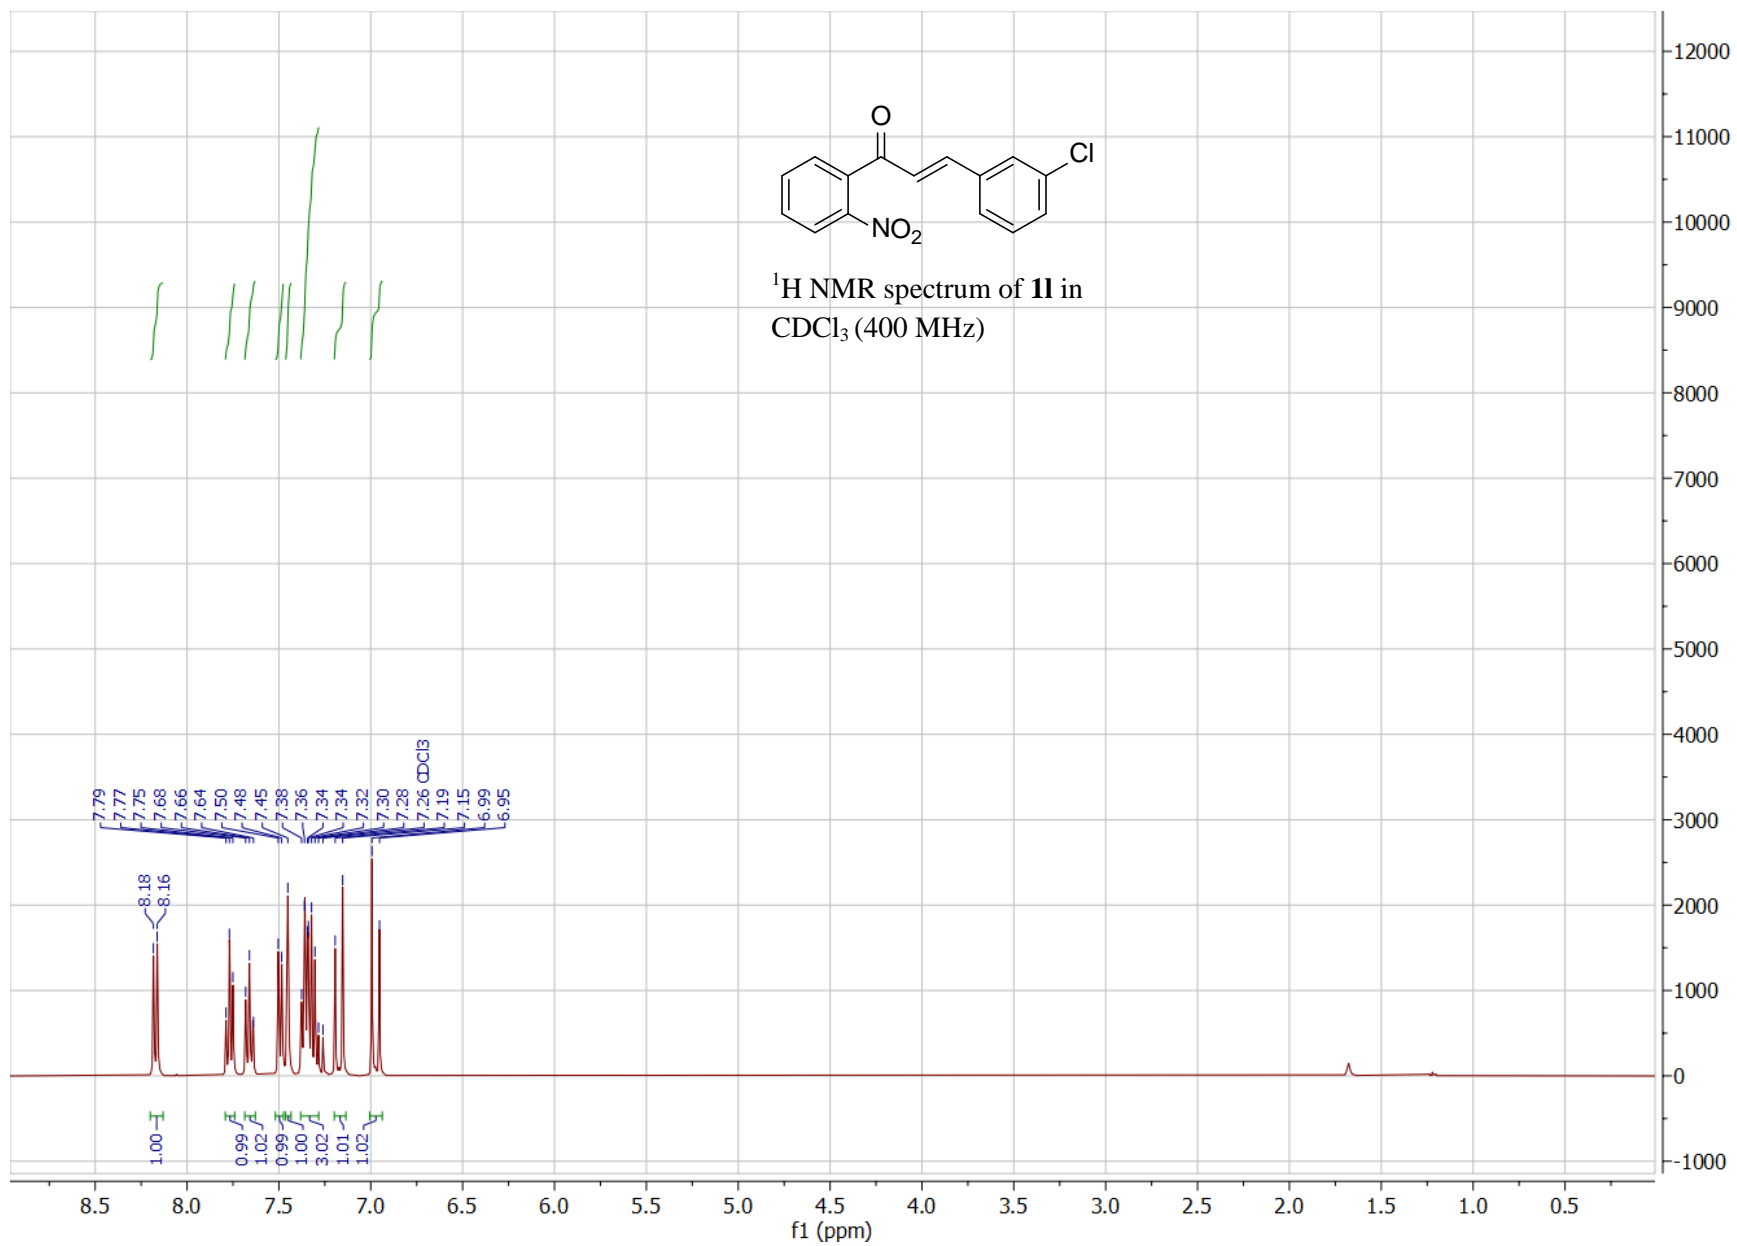

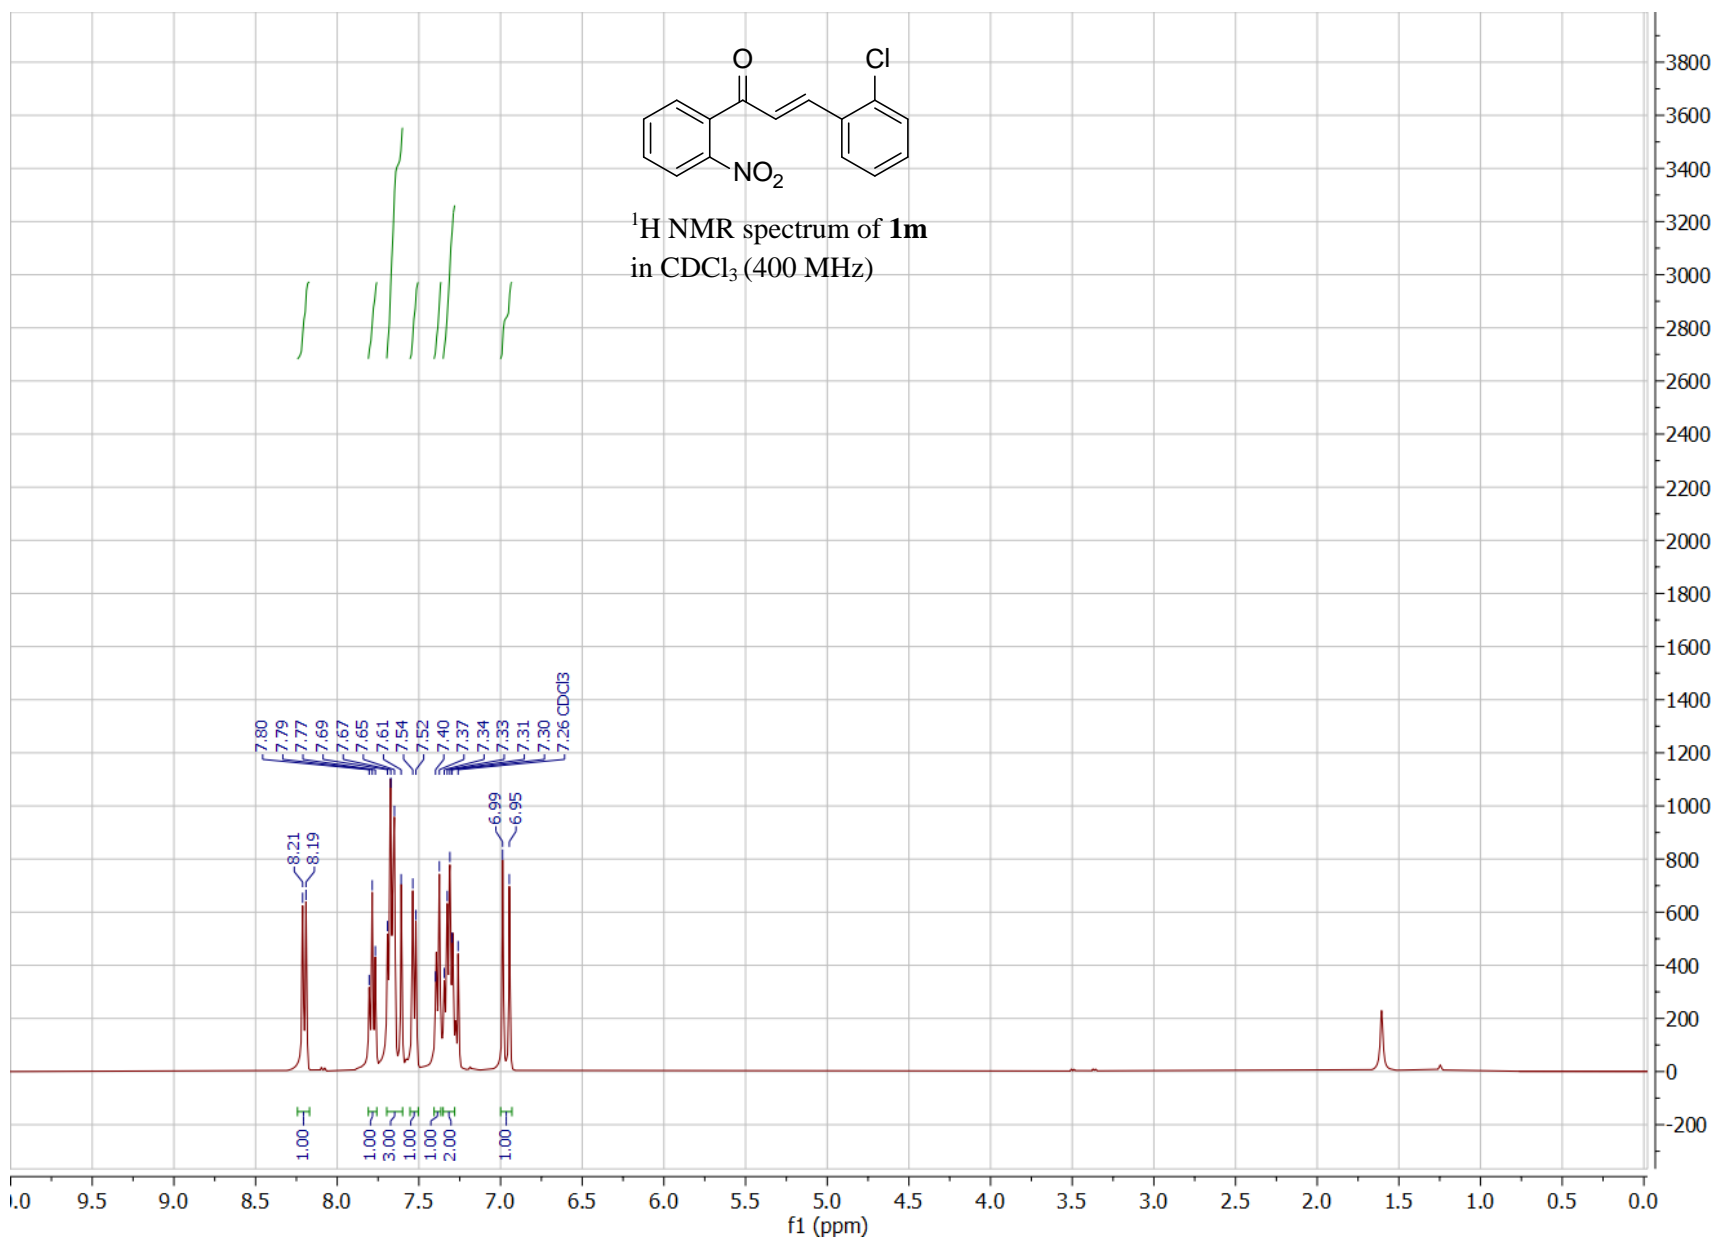

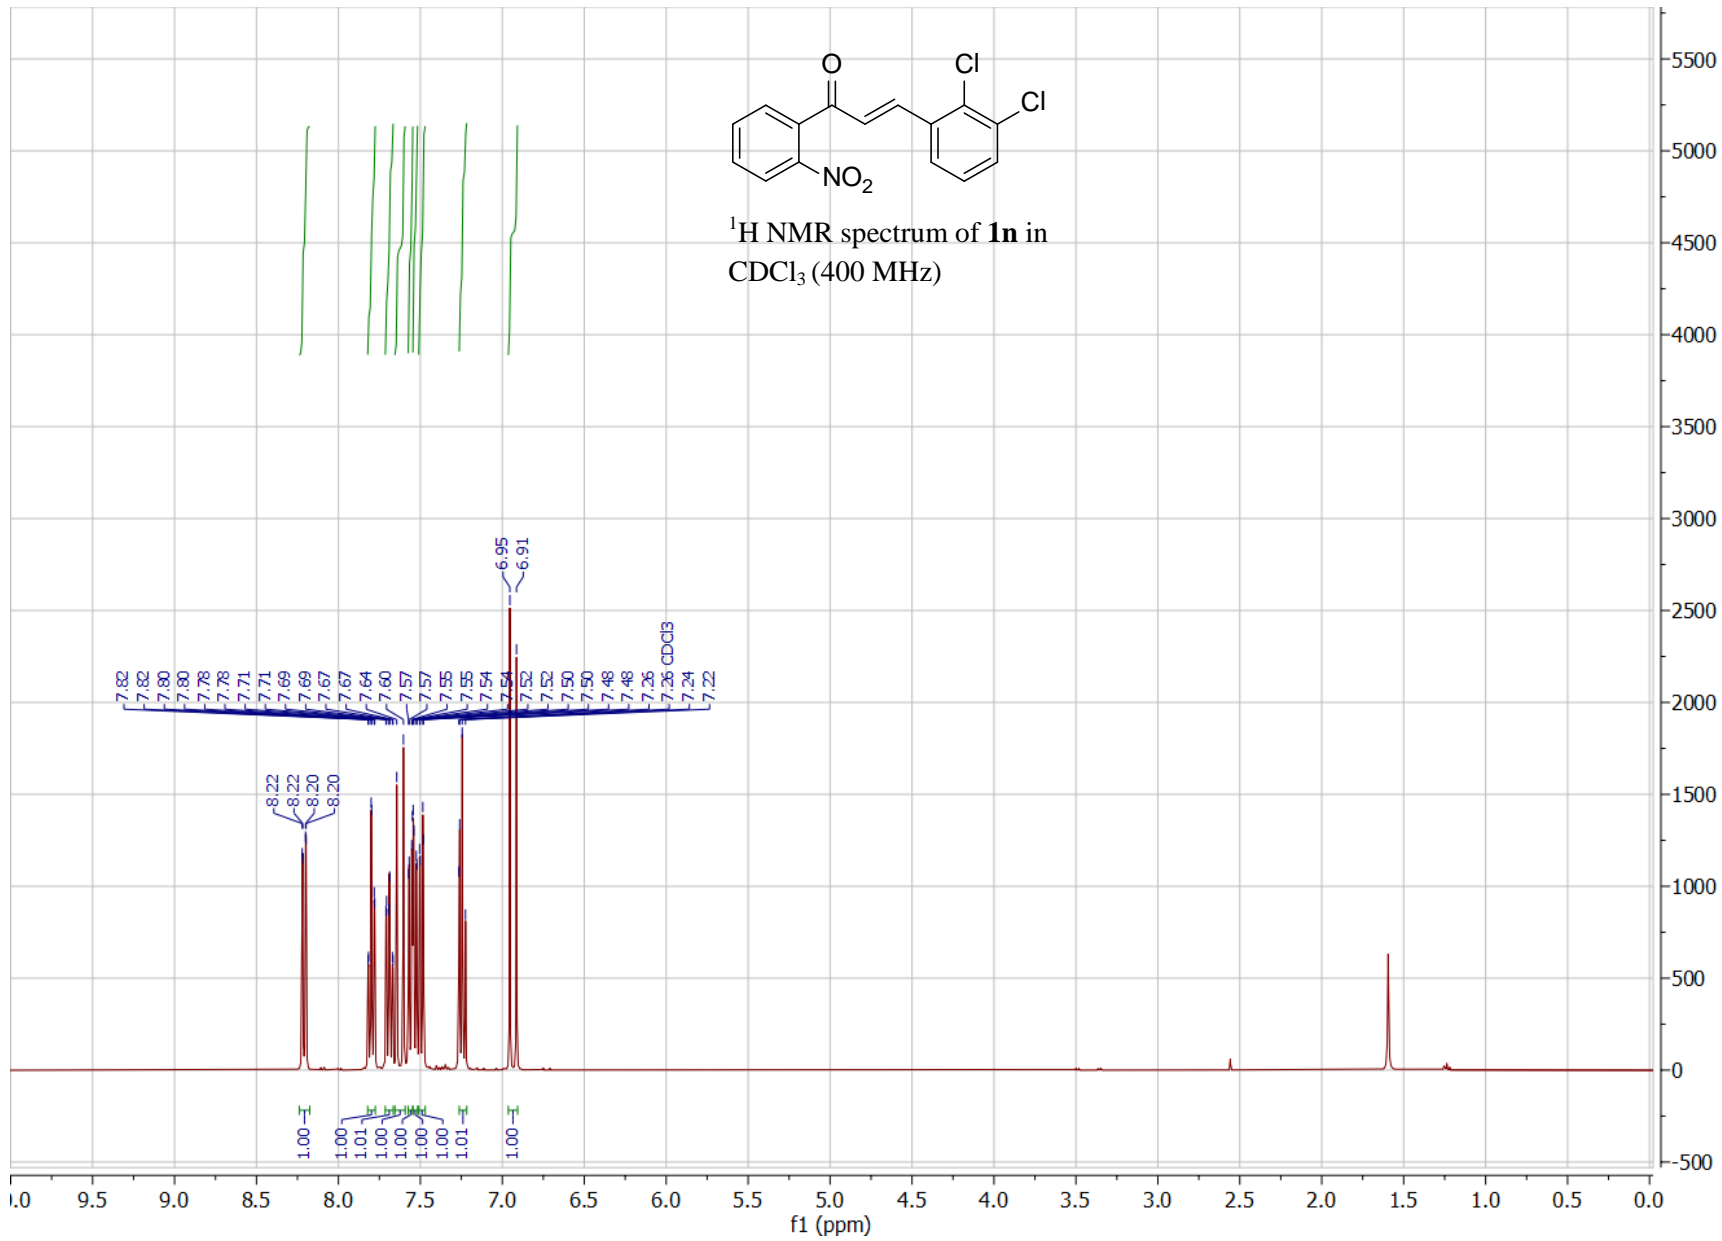

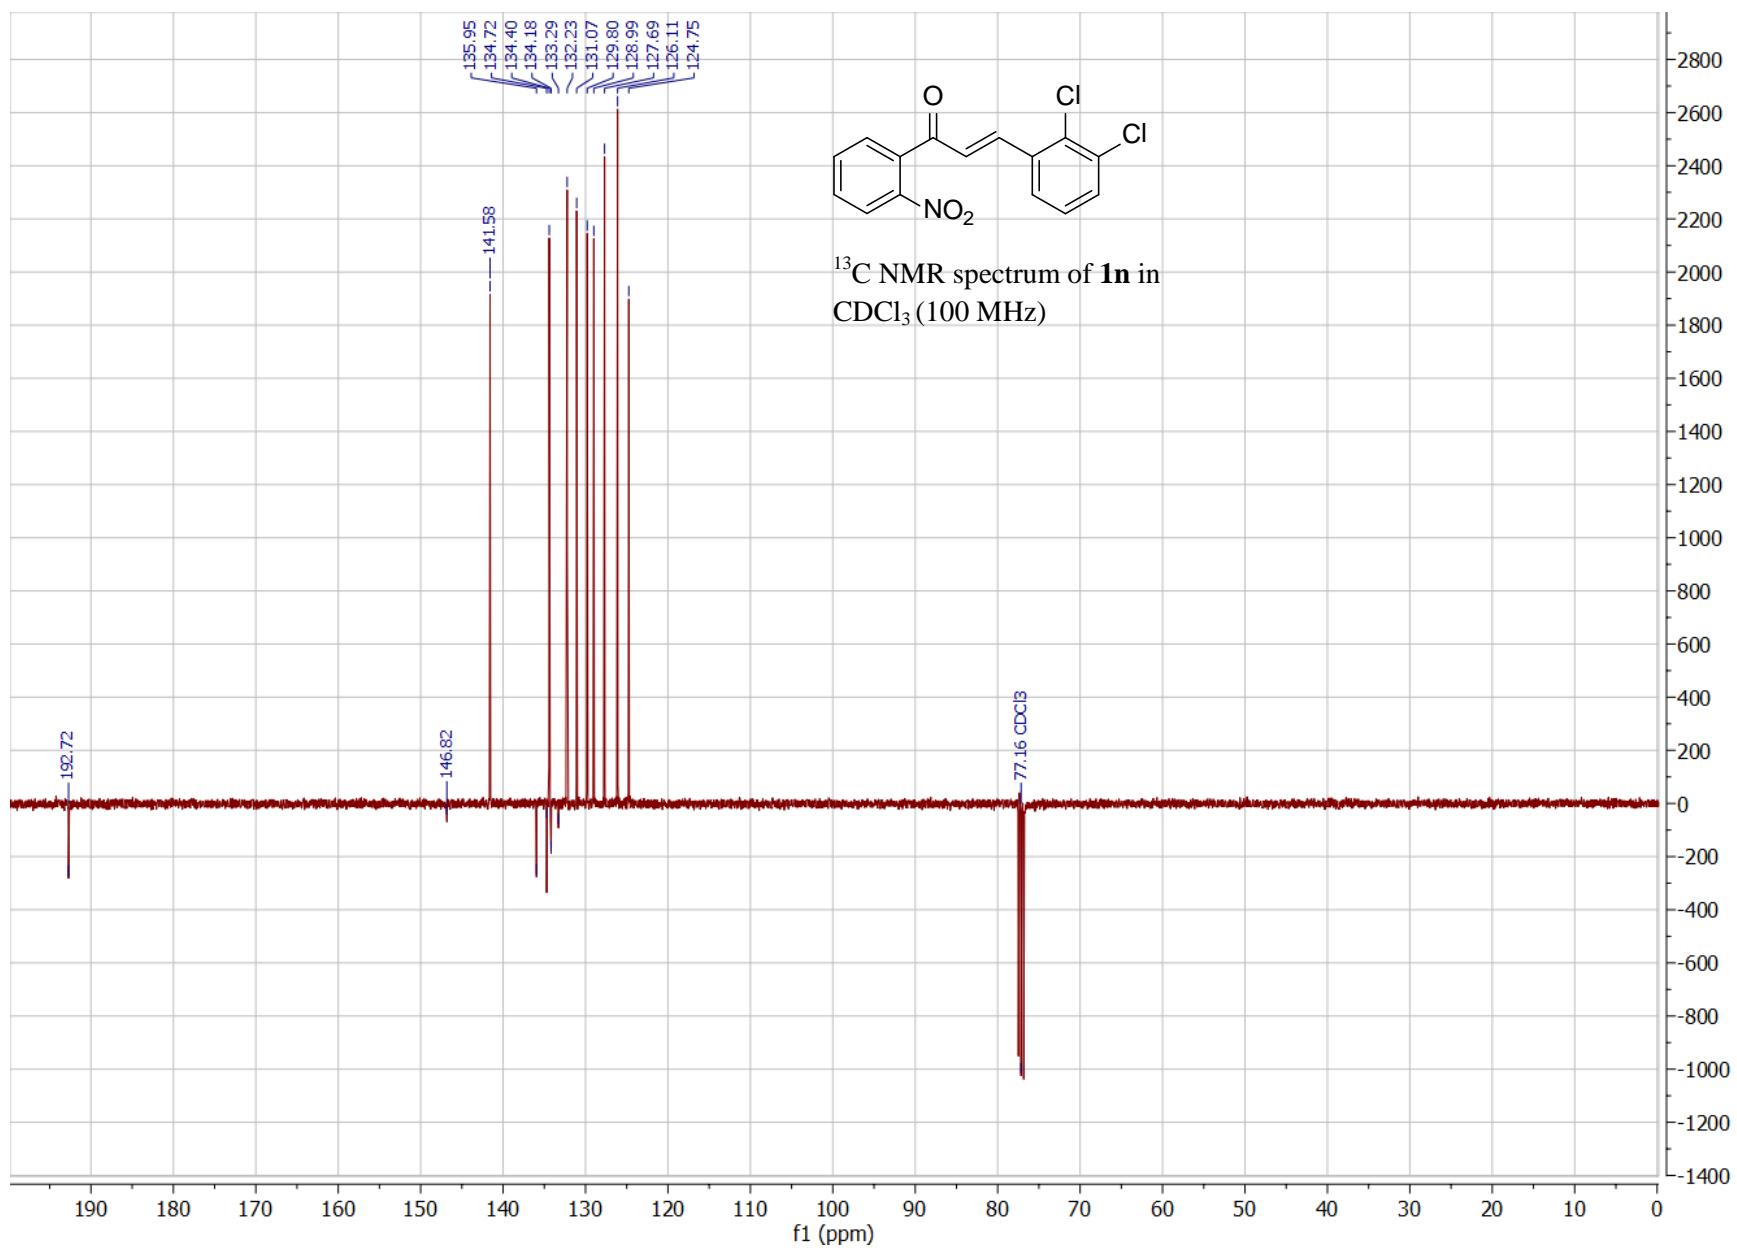



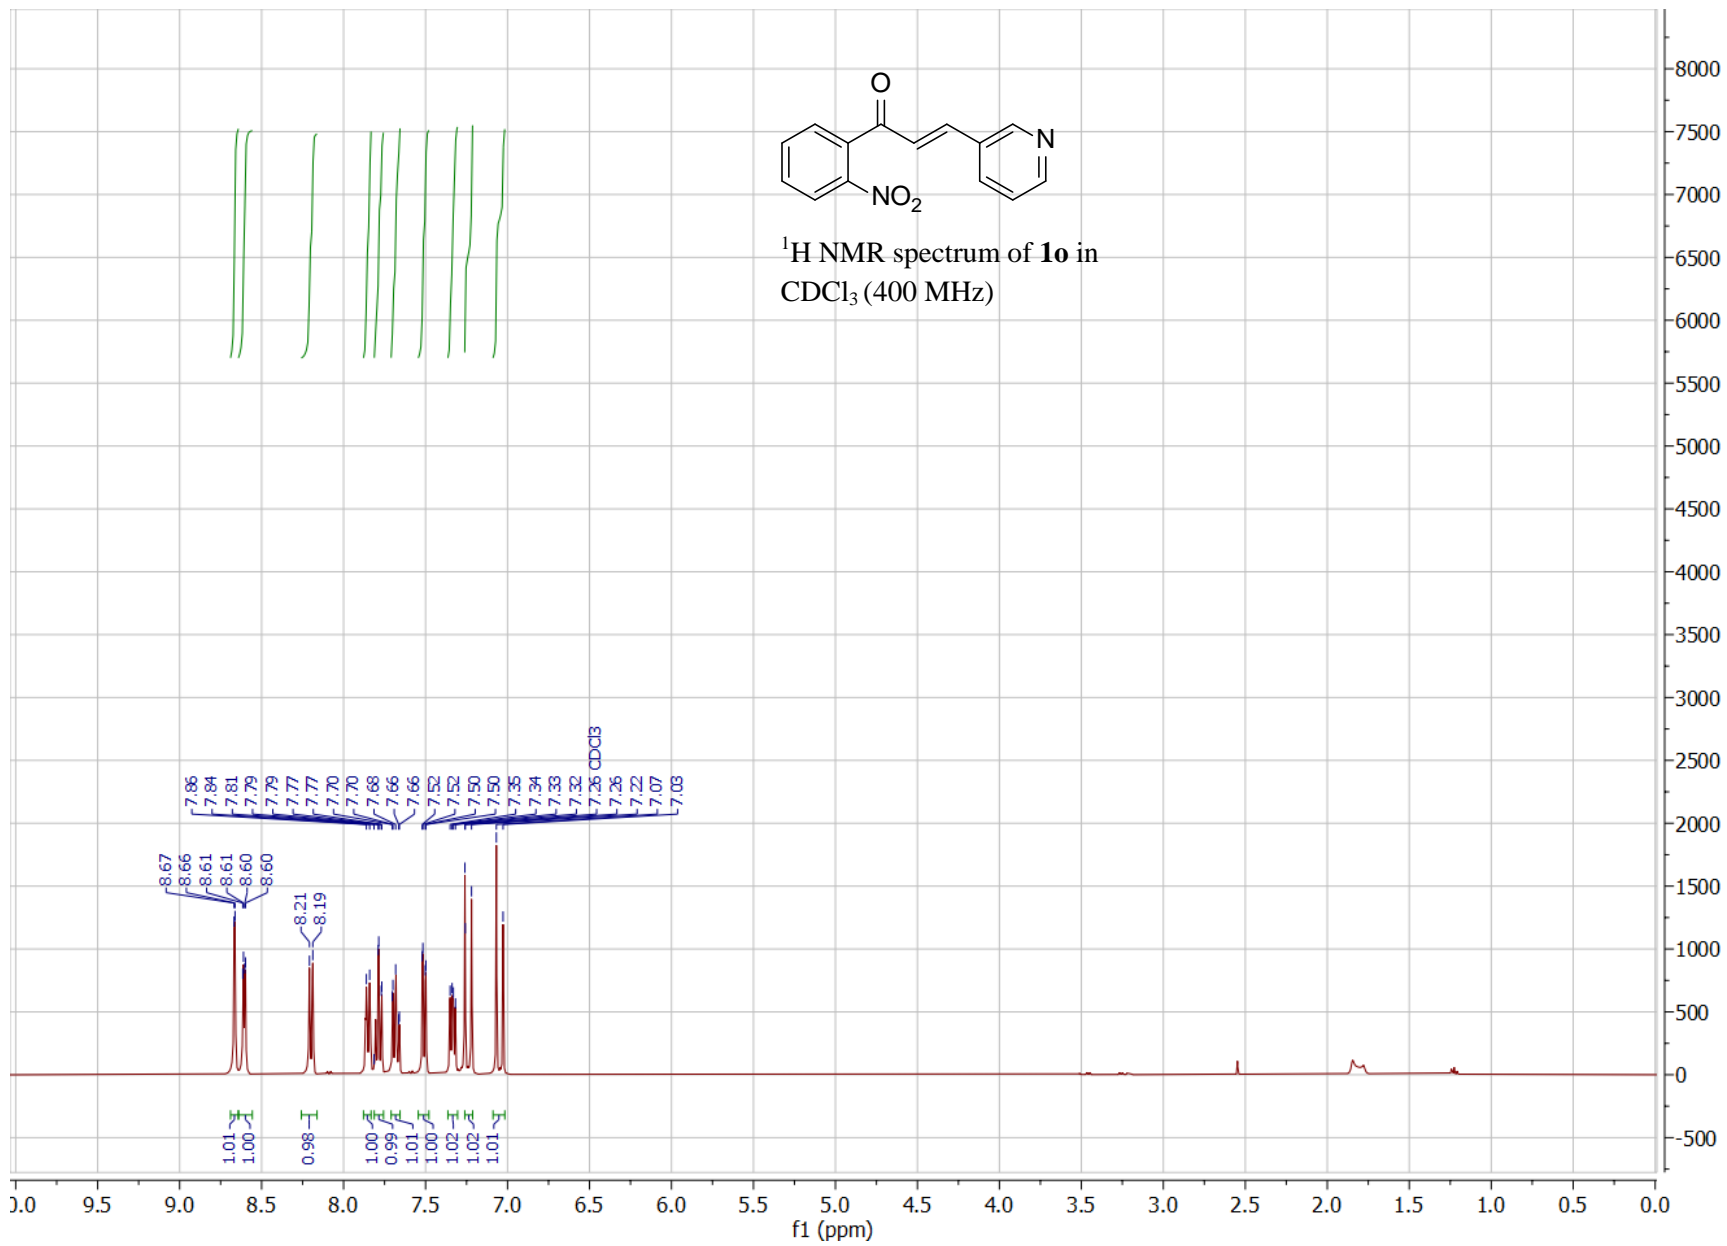

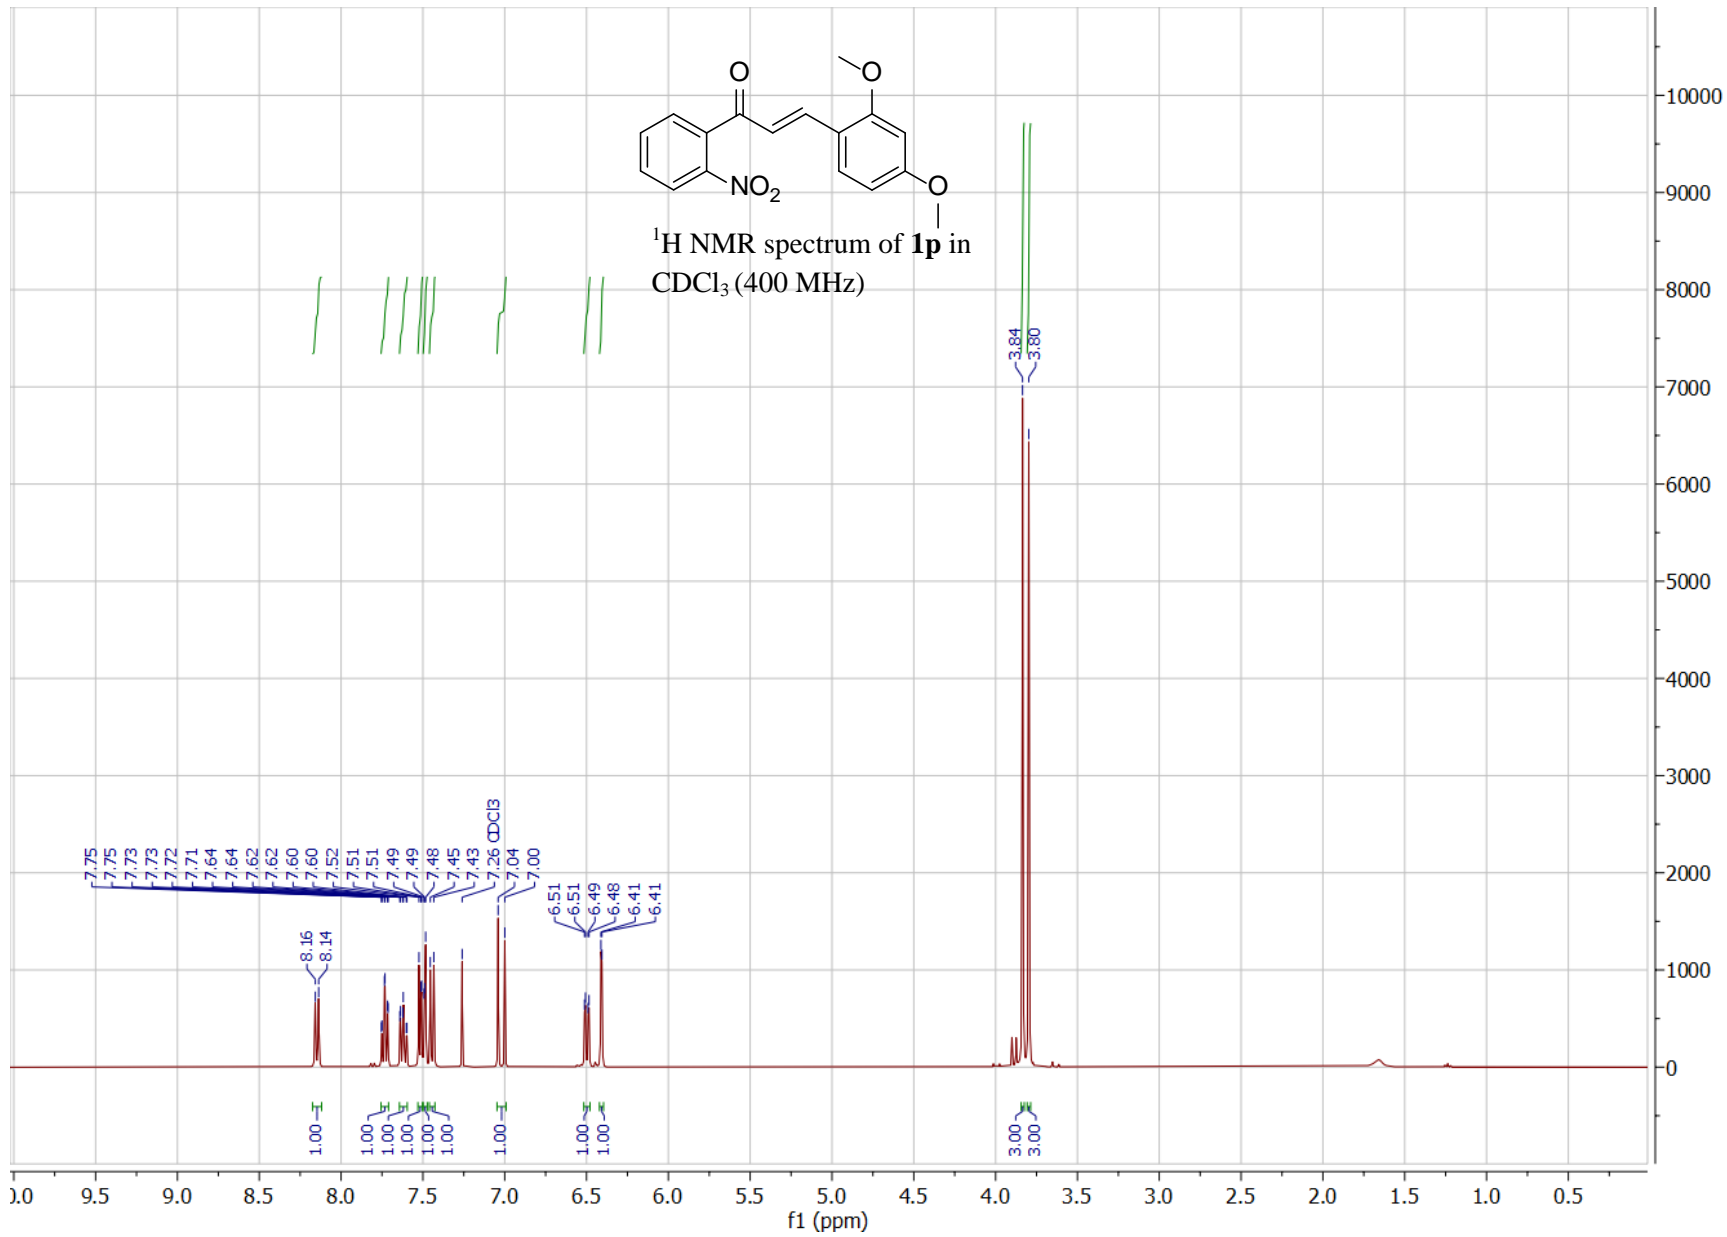

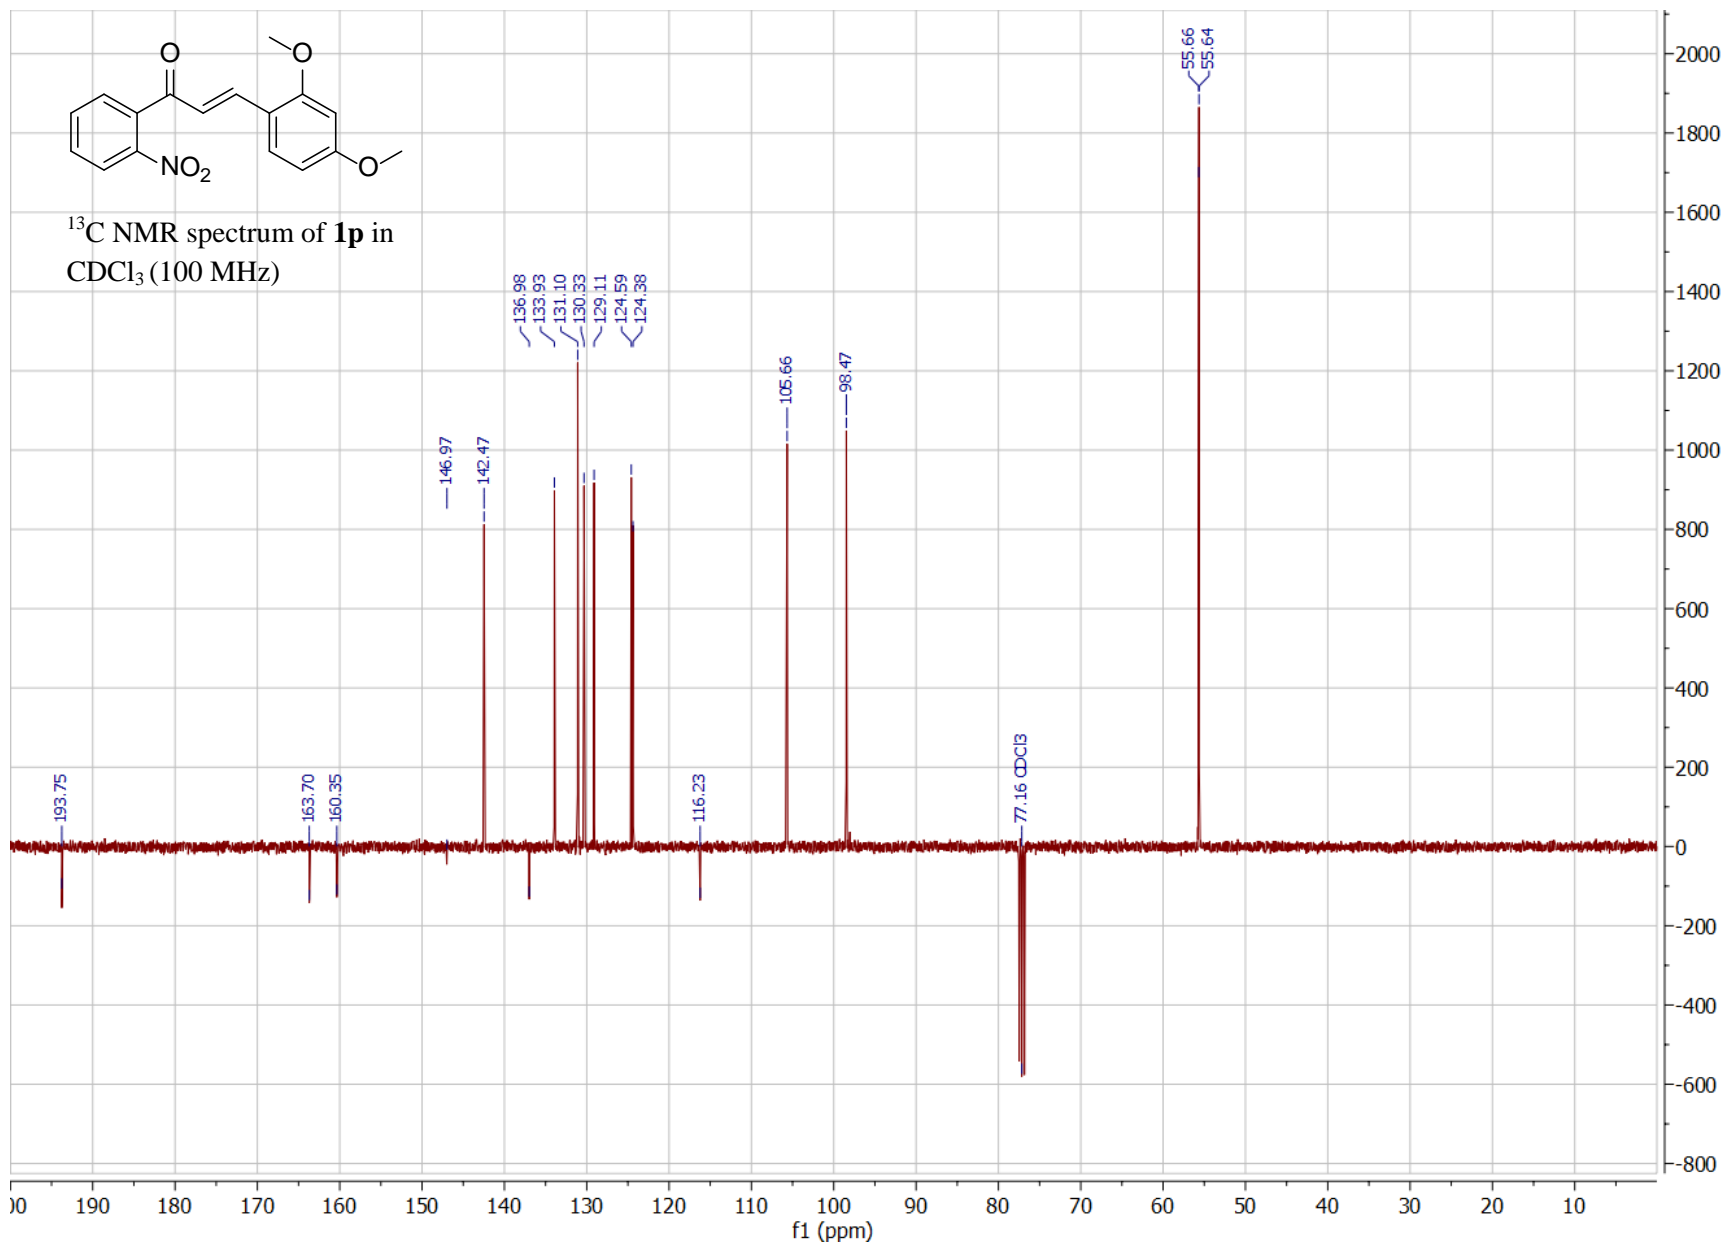

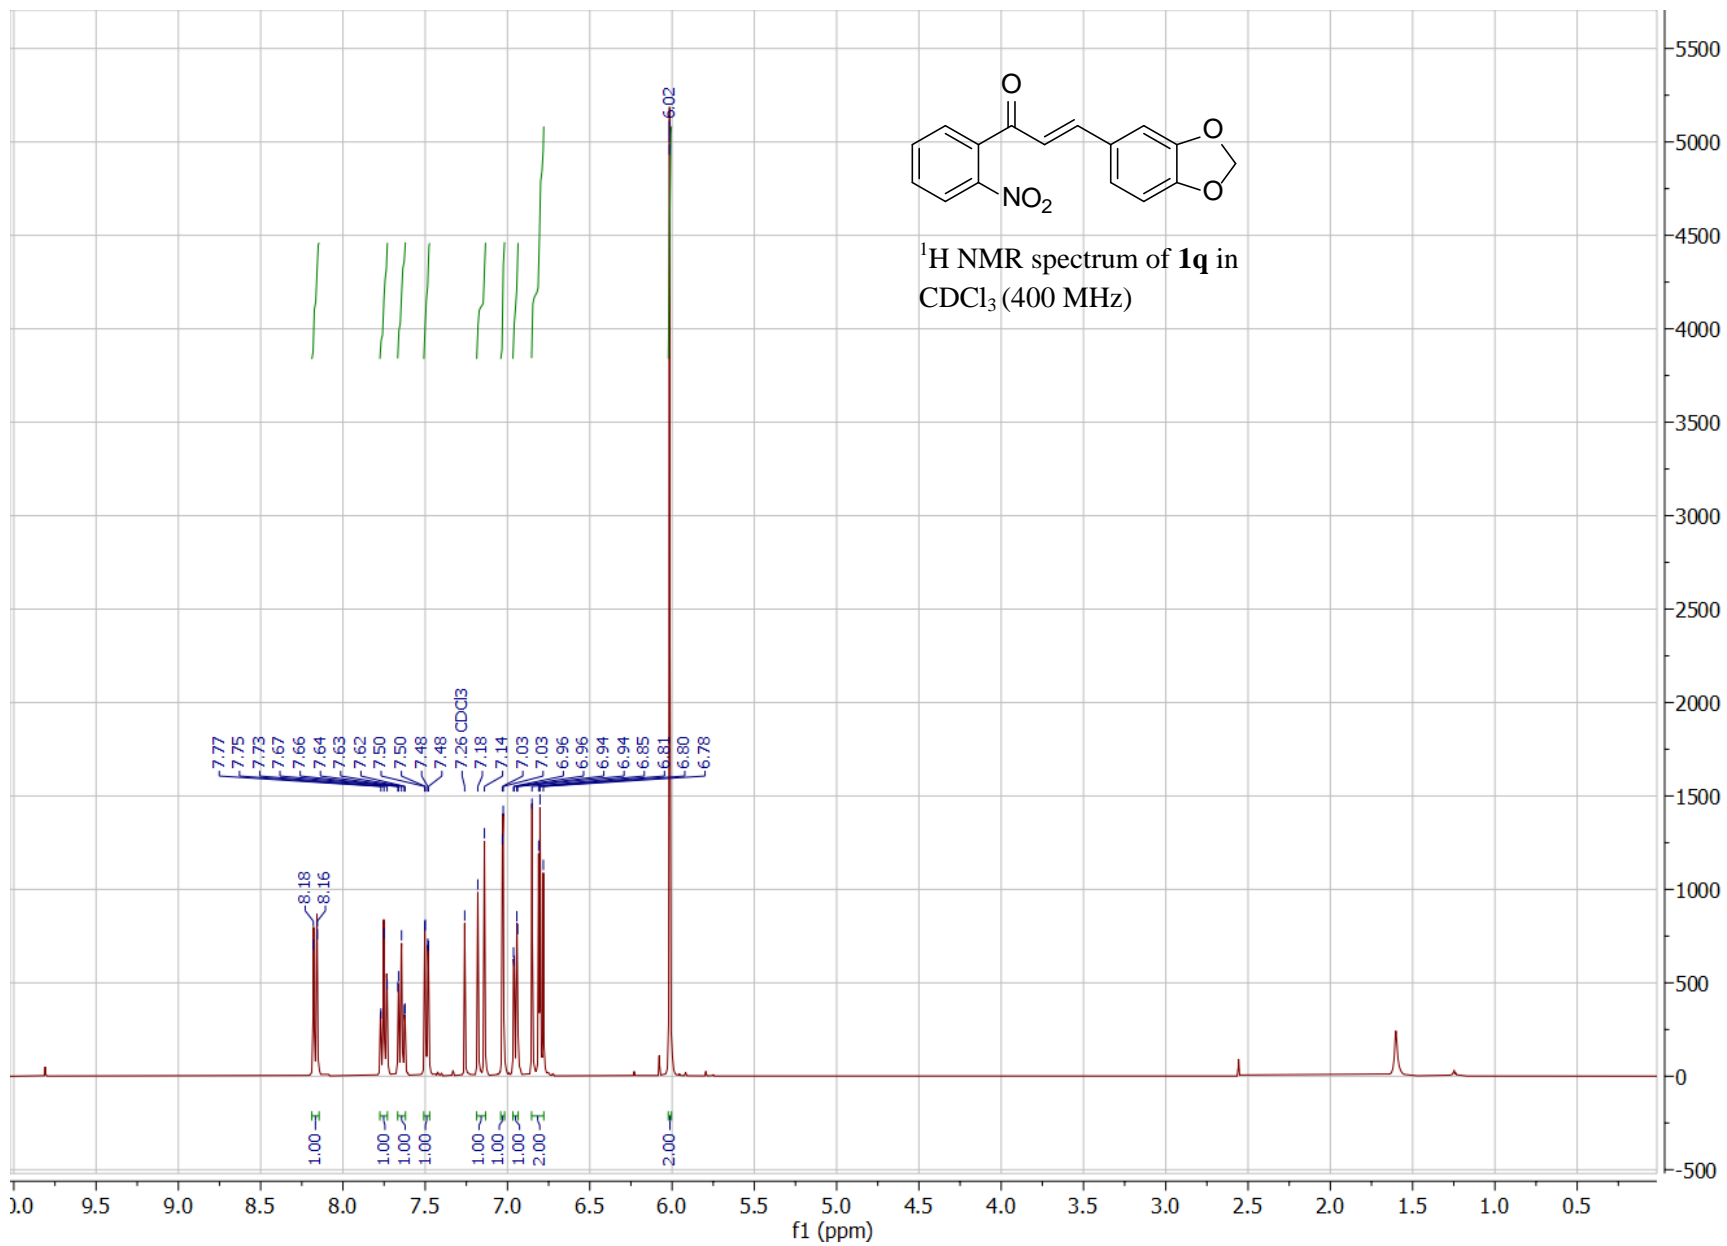

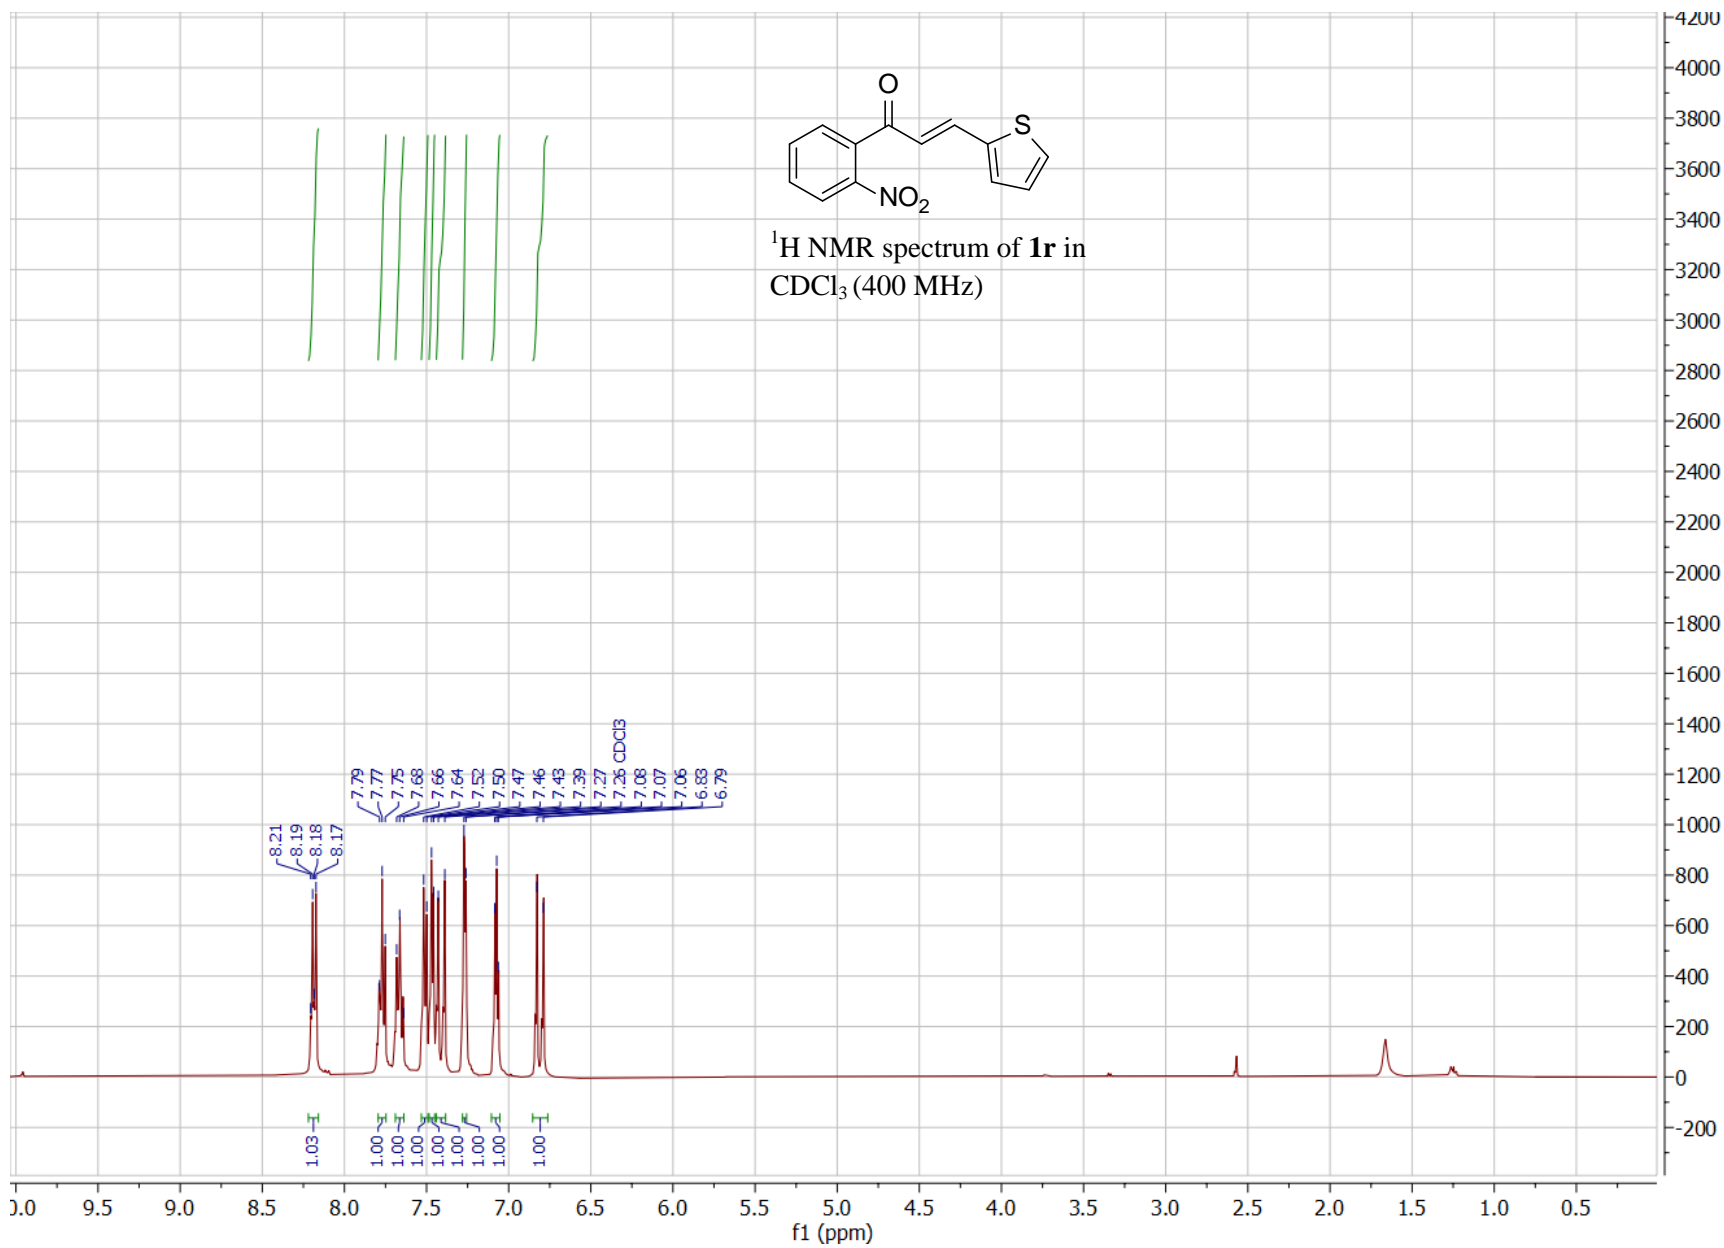

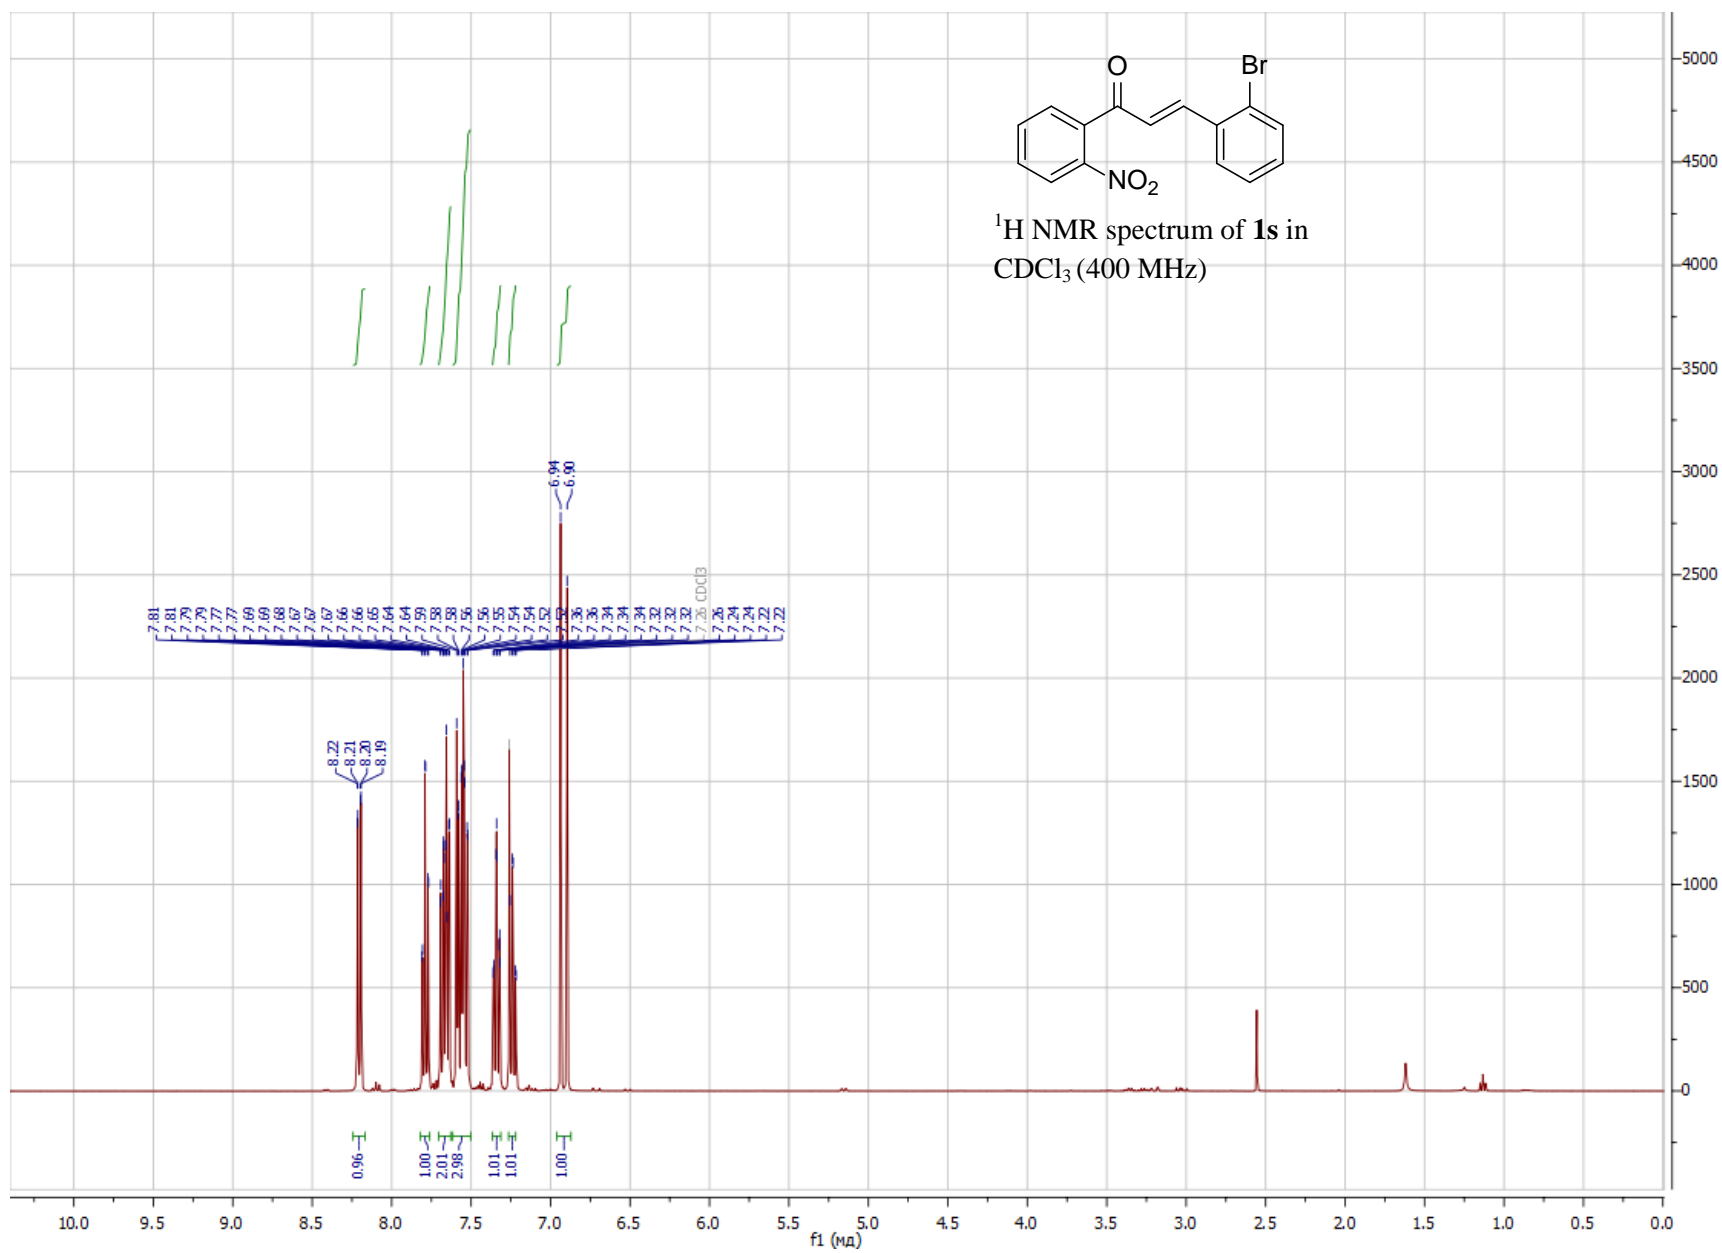

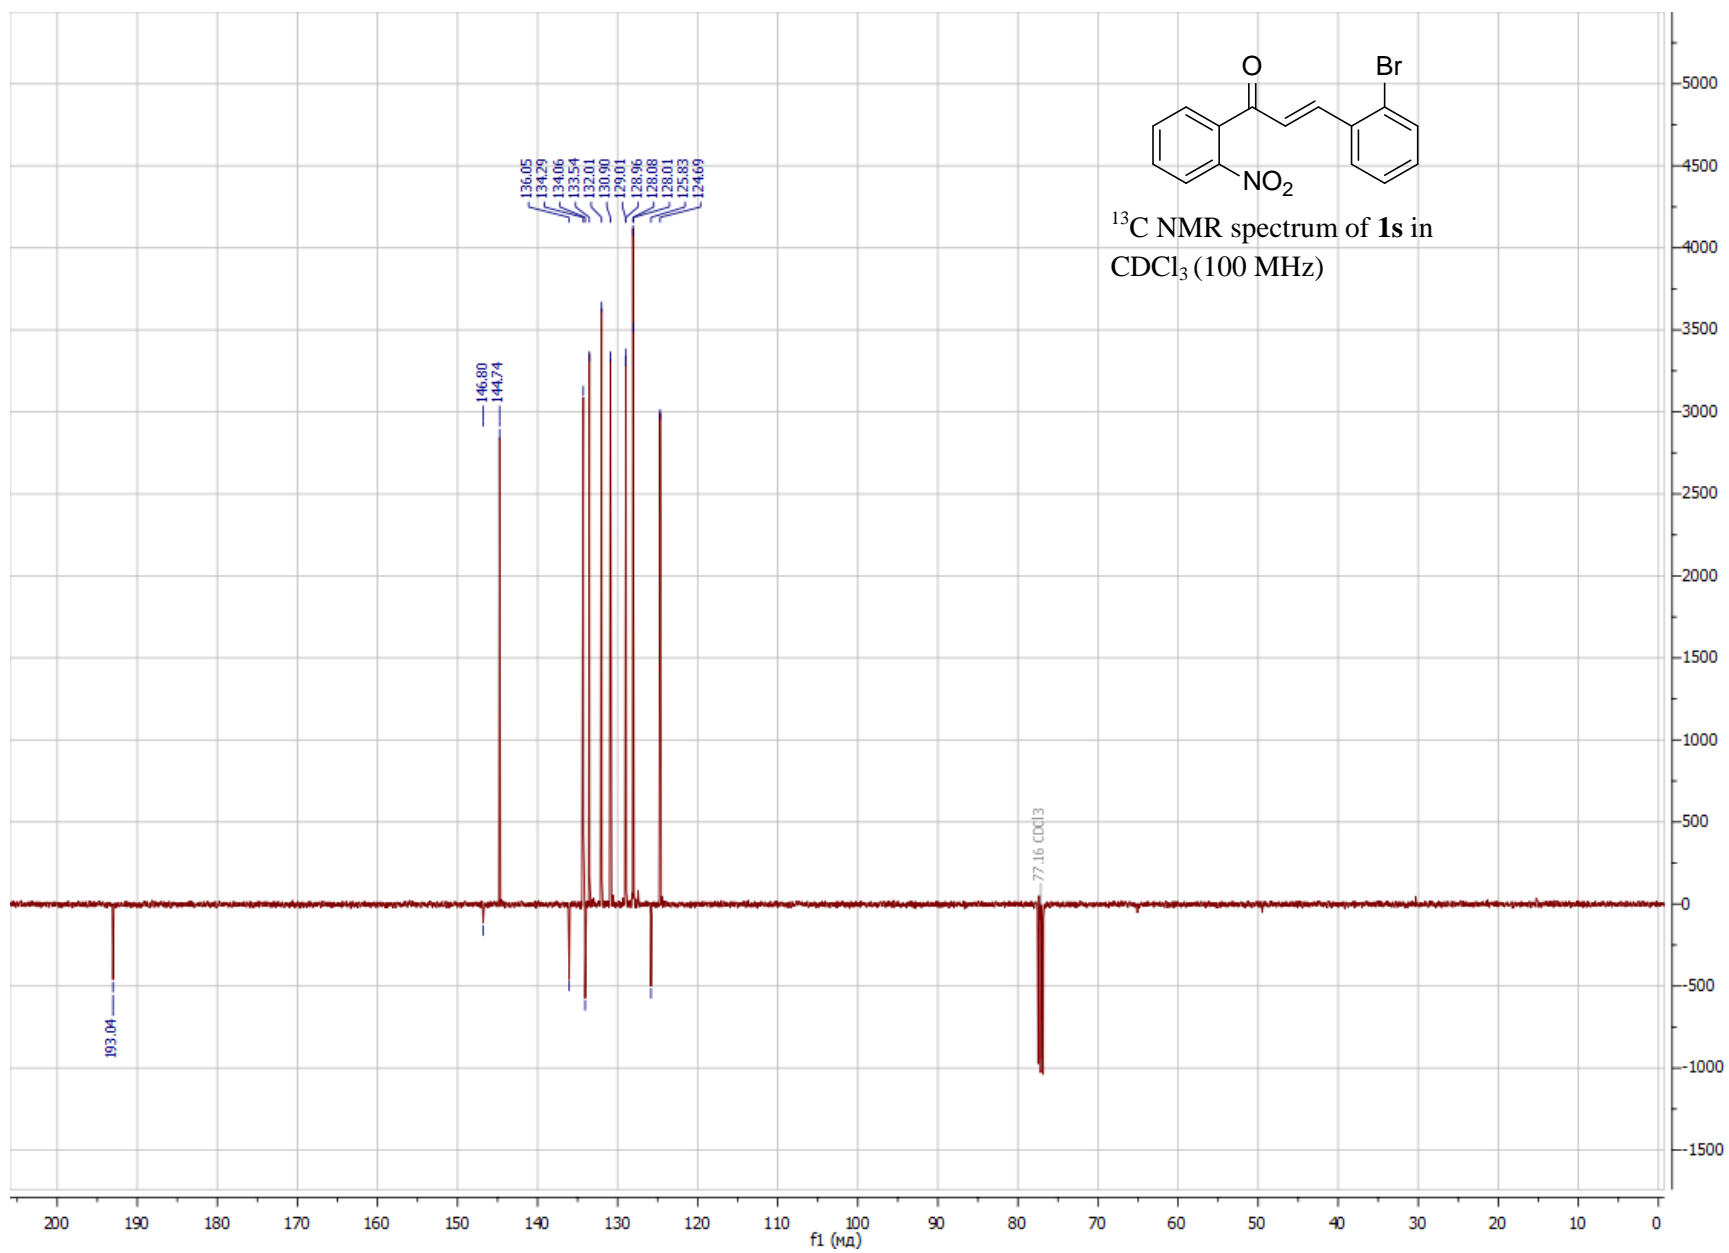

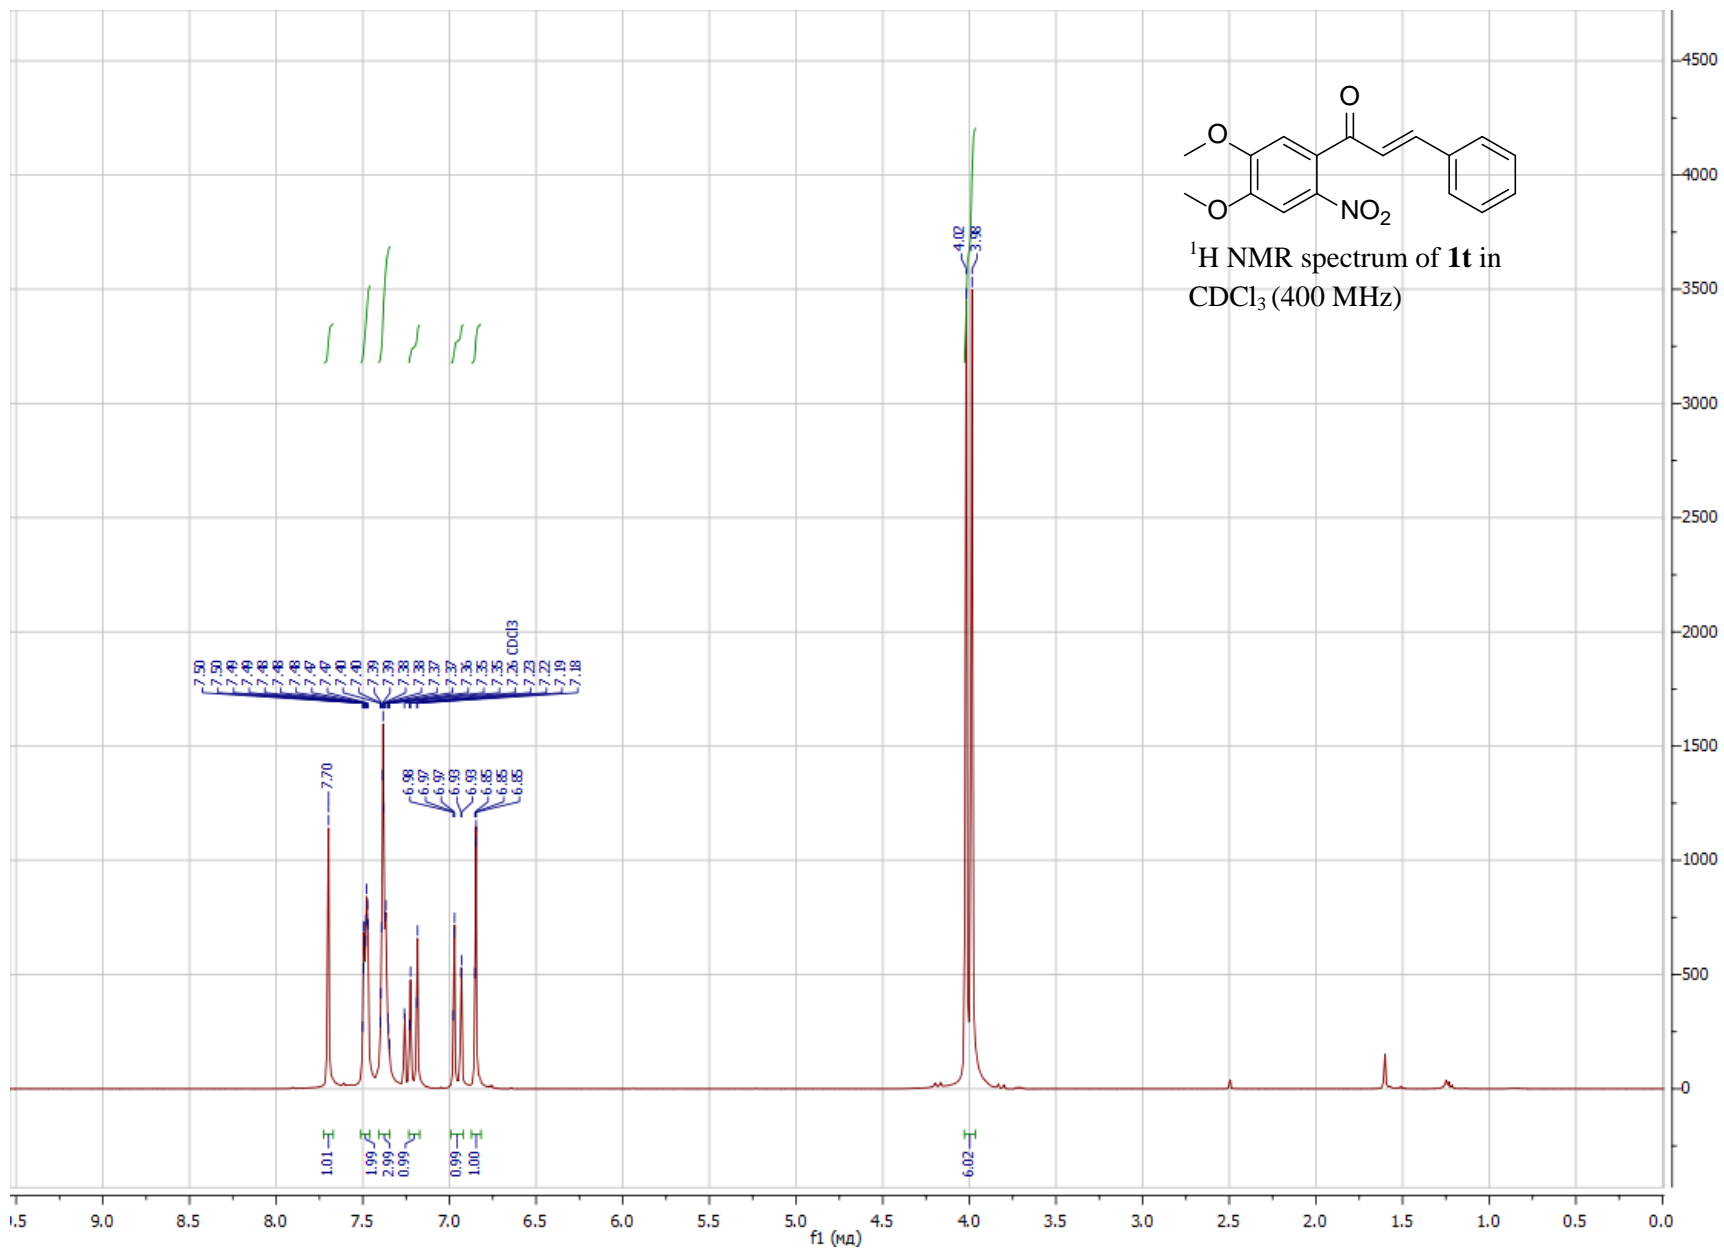



$^1\text{H}$  and  $^{13}\text{C}$  Spectral Charts for 2-((2,5-dioxo-4-aryl-2,5-dihydro-1H-pyrrol-3-yl)amino)benzoic acids (**4**)

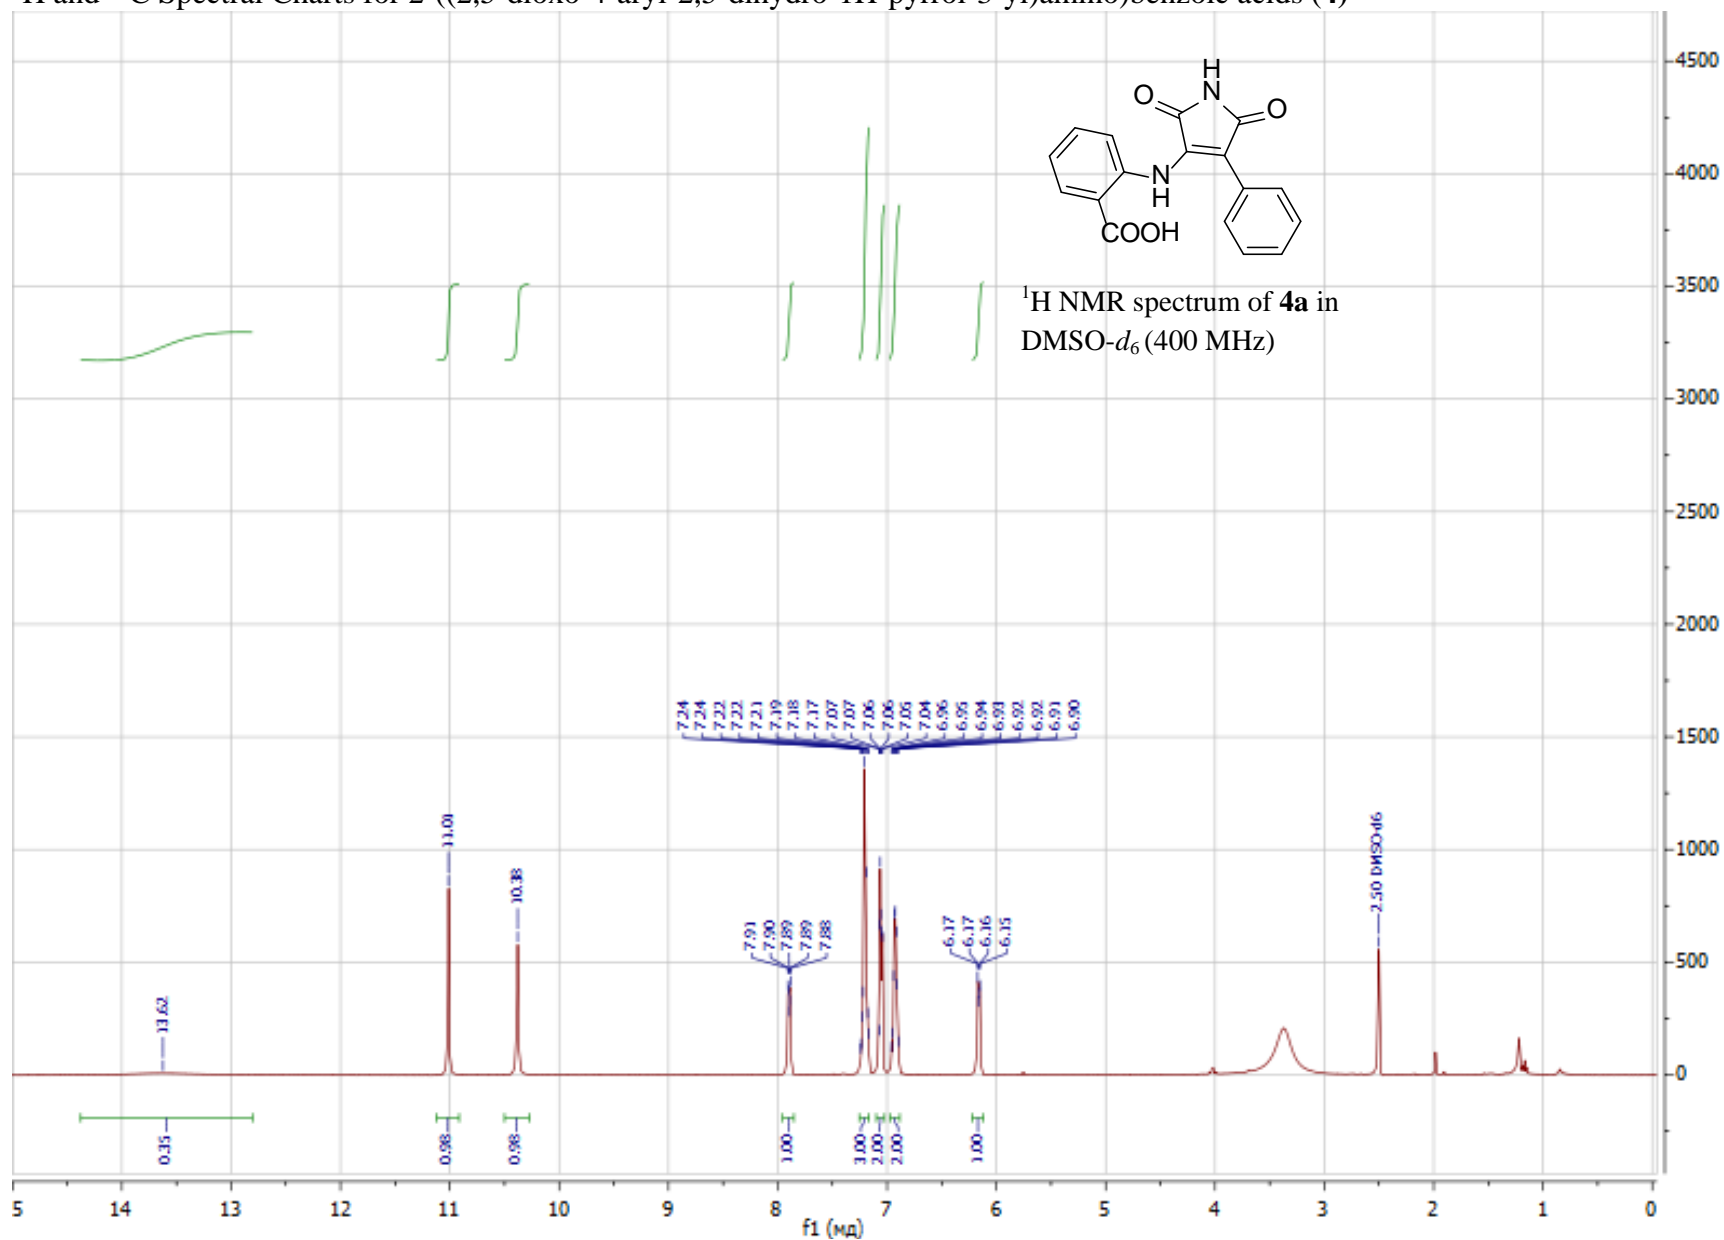

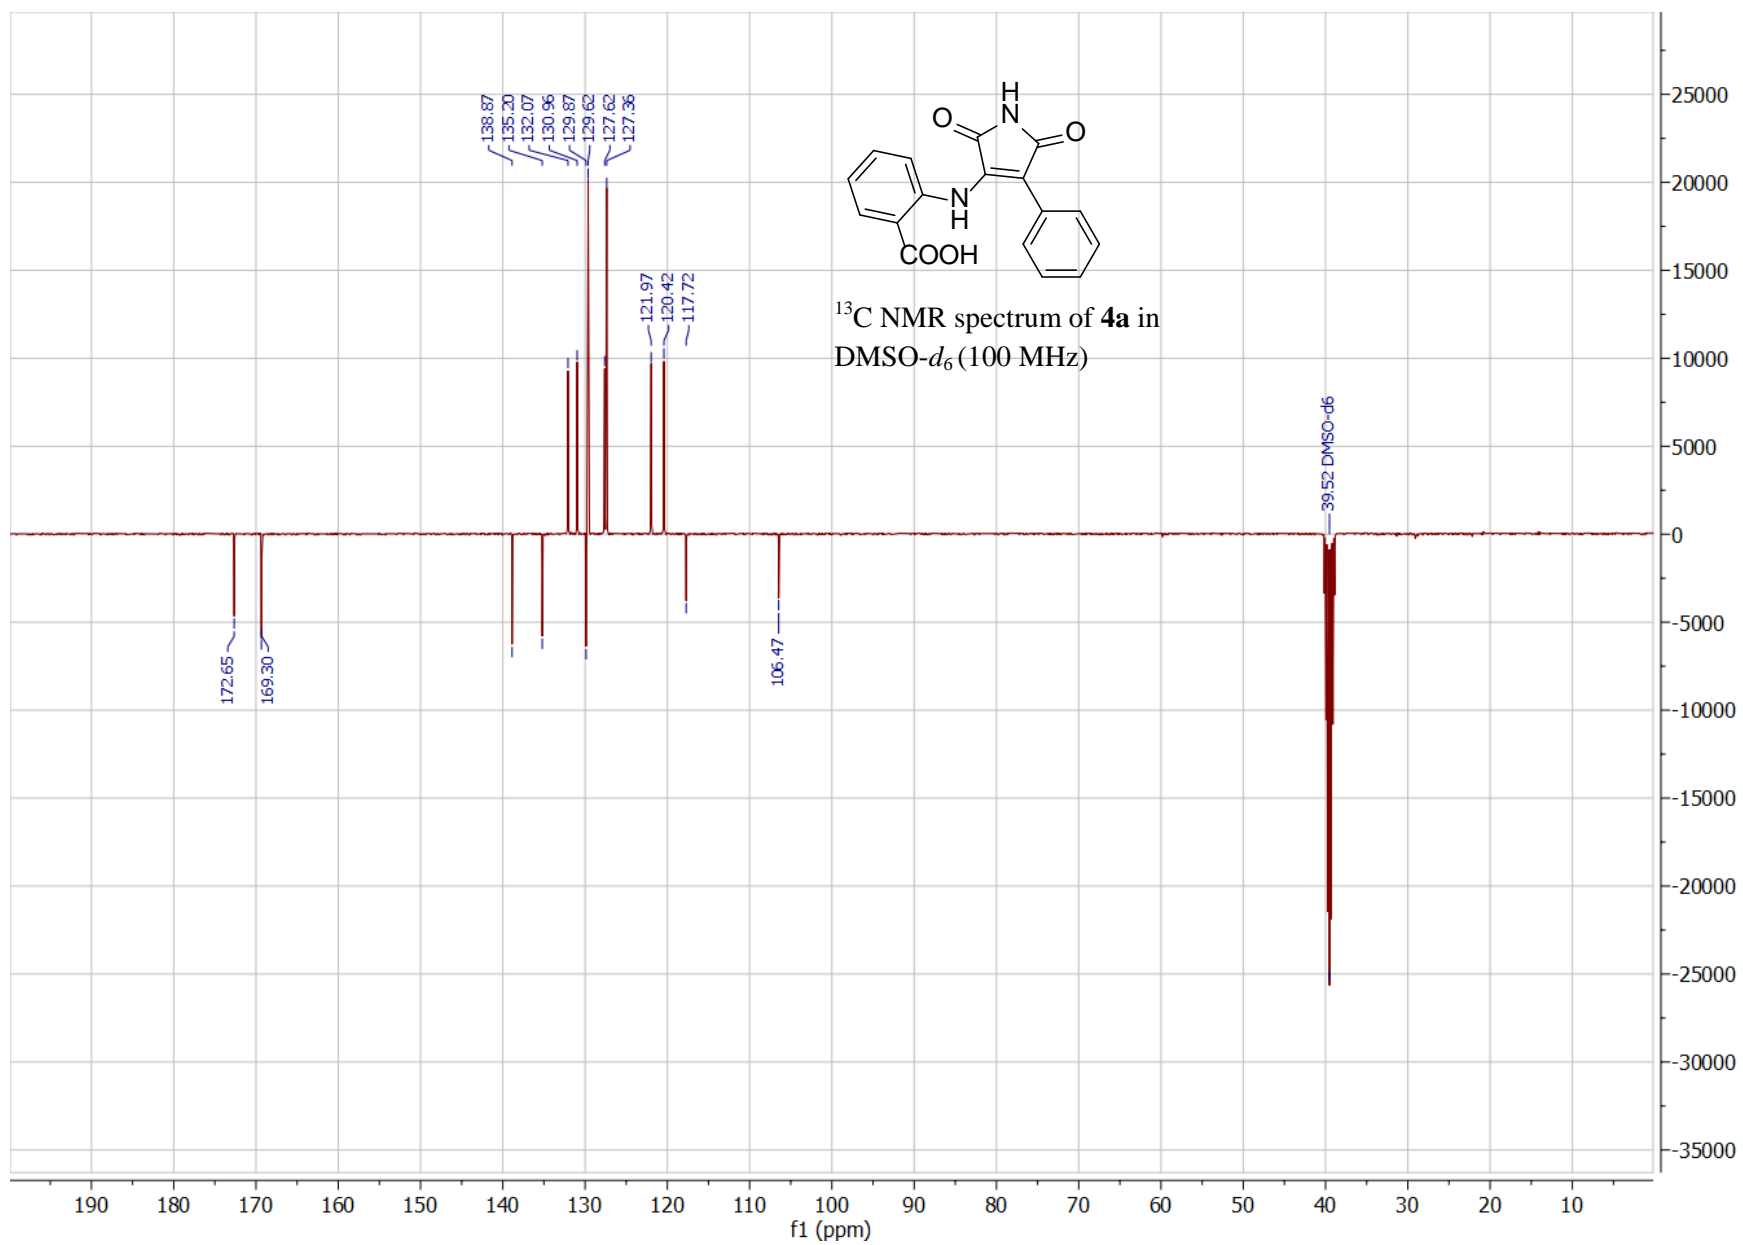

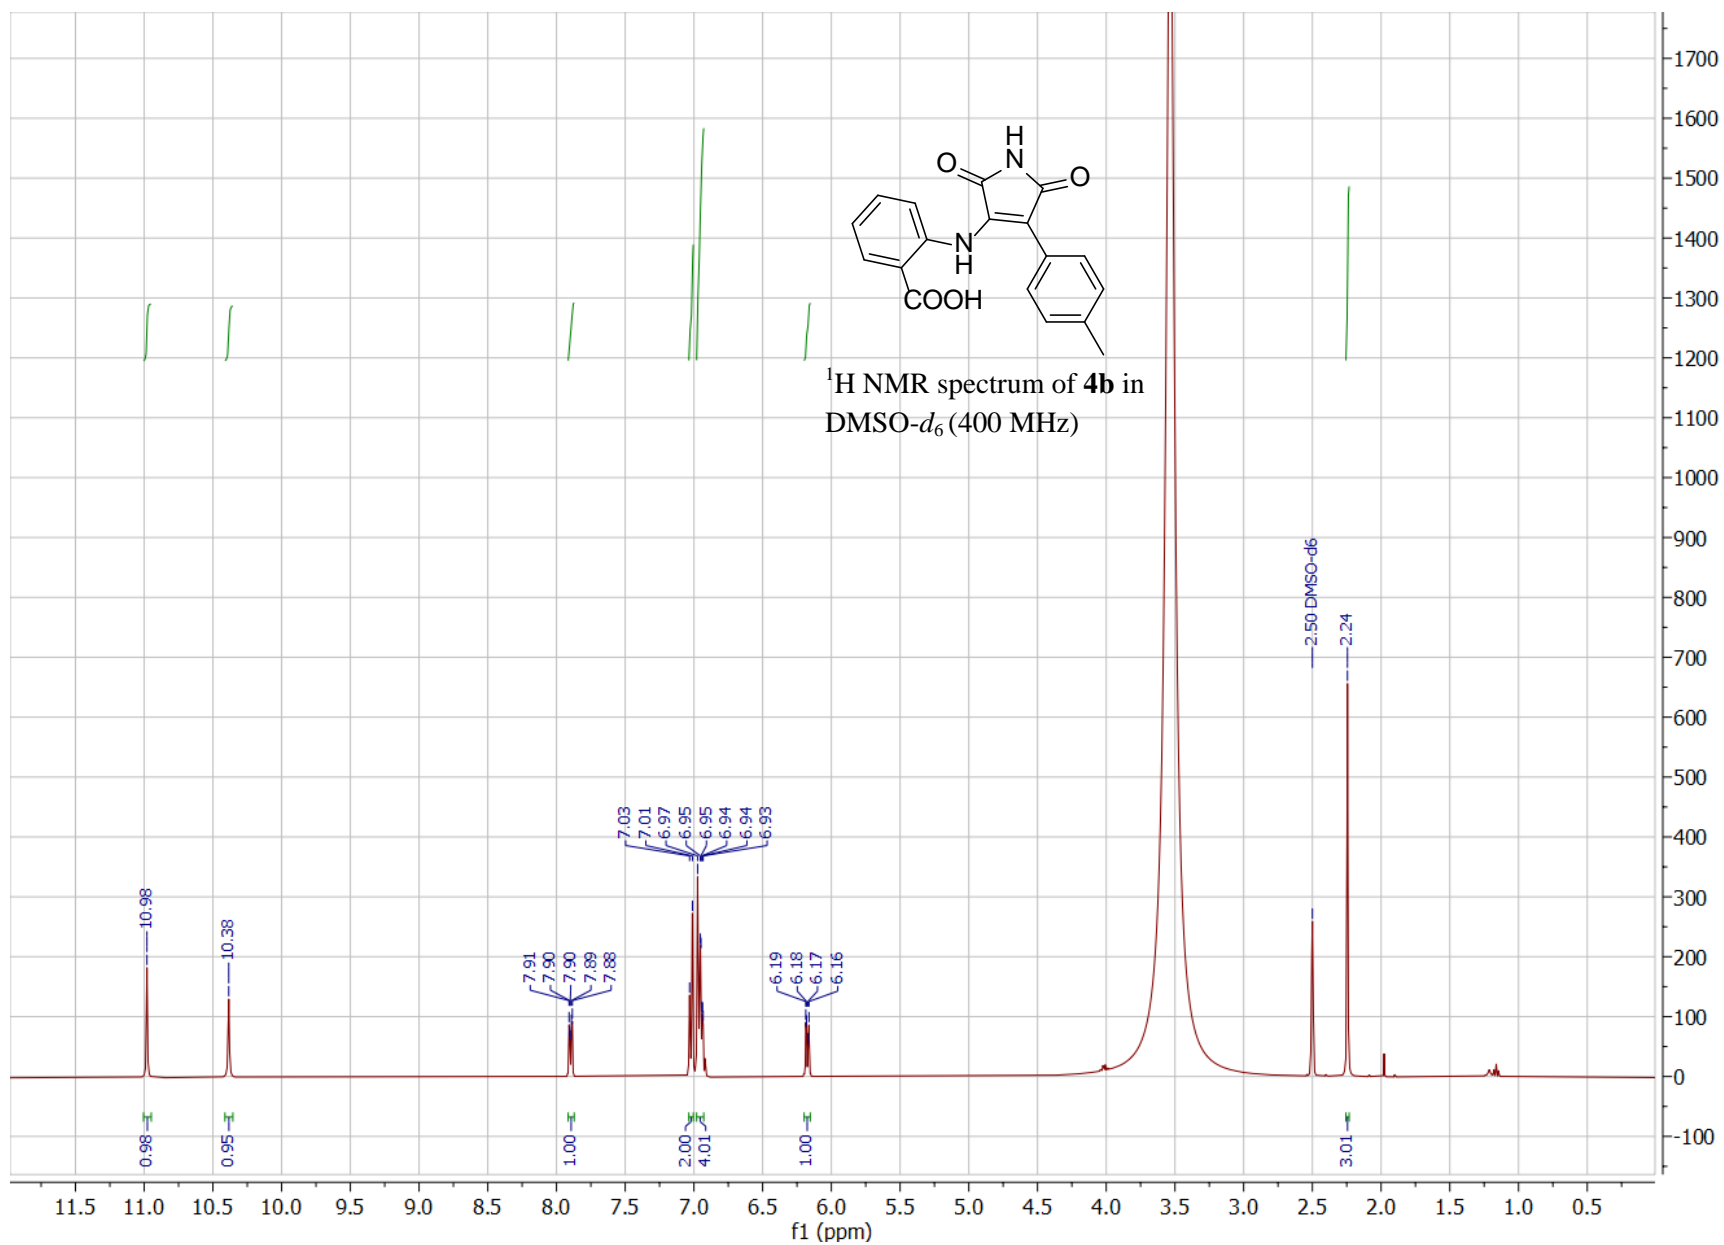

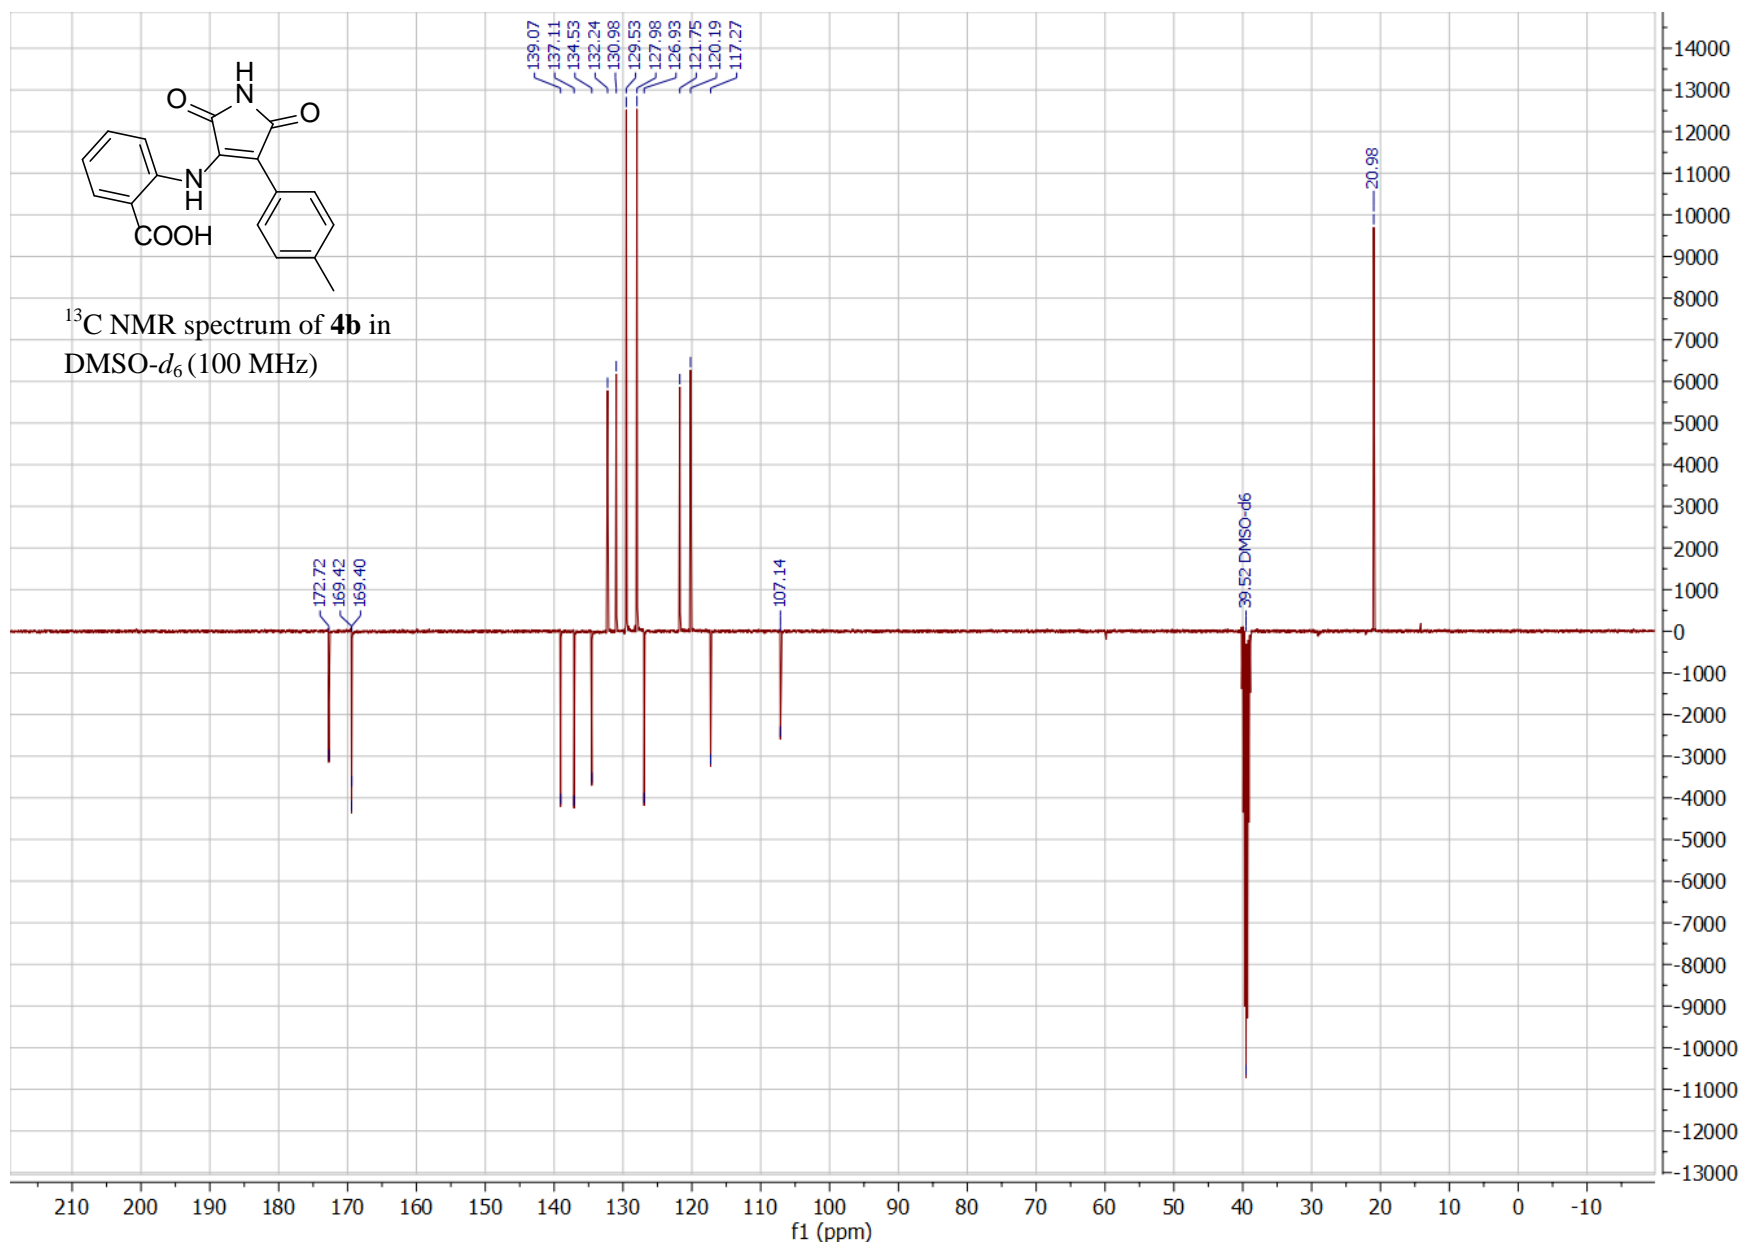

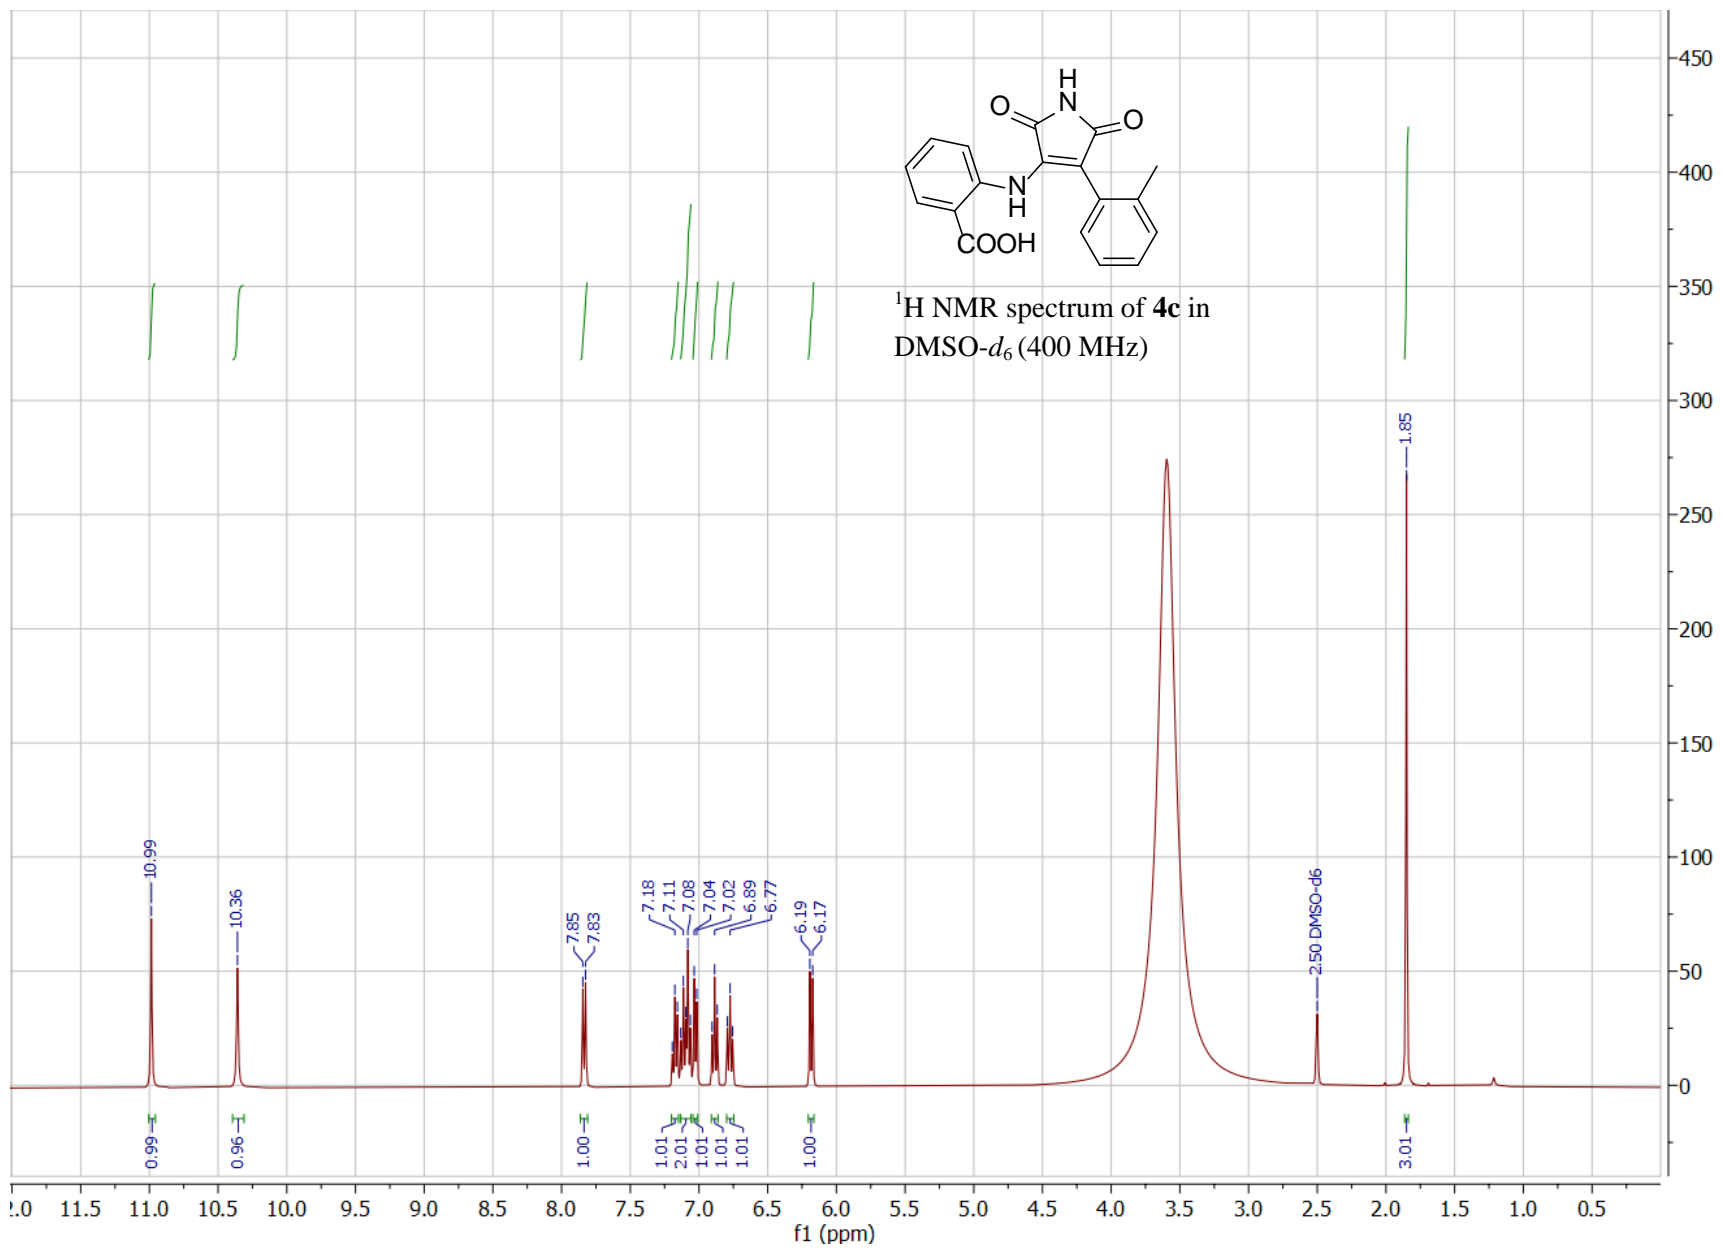

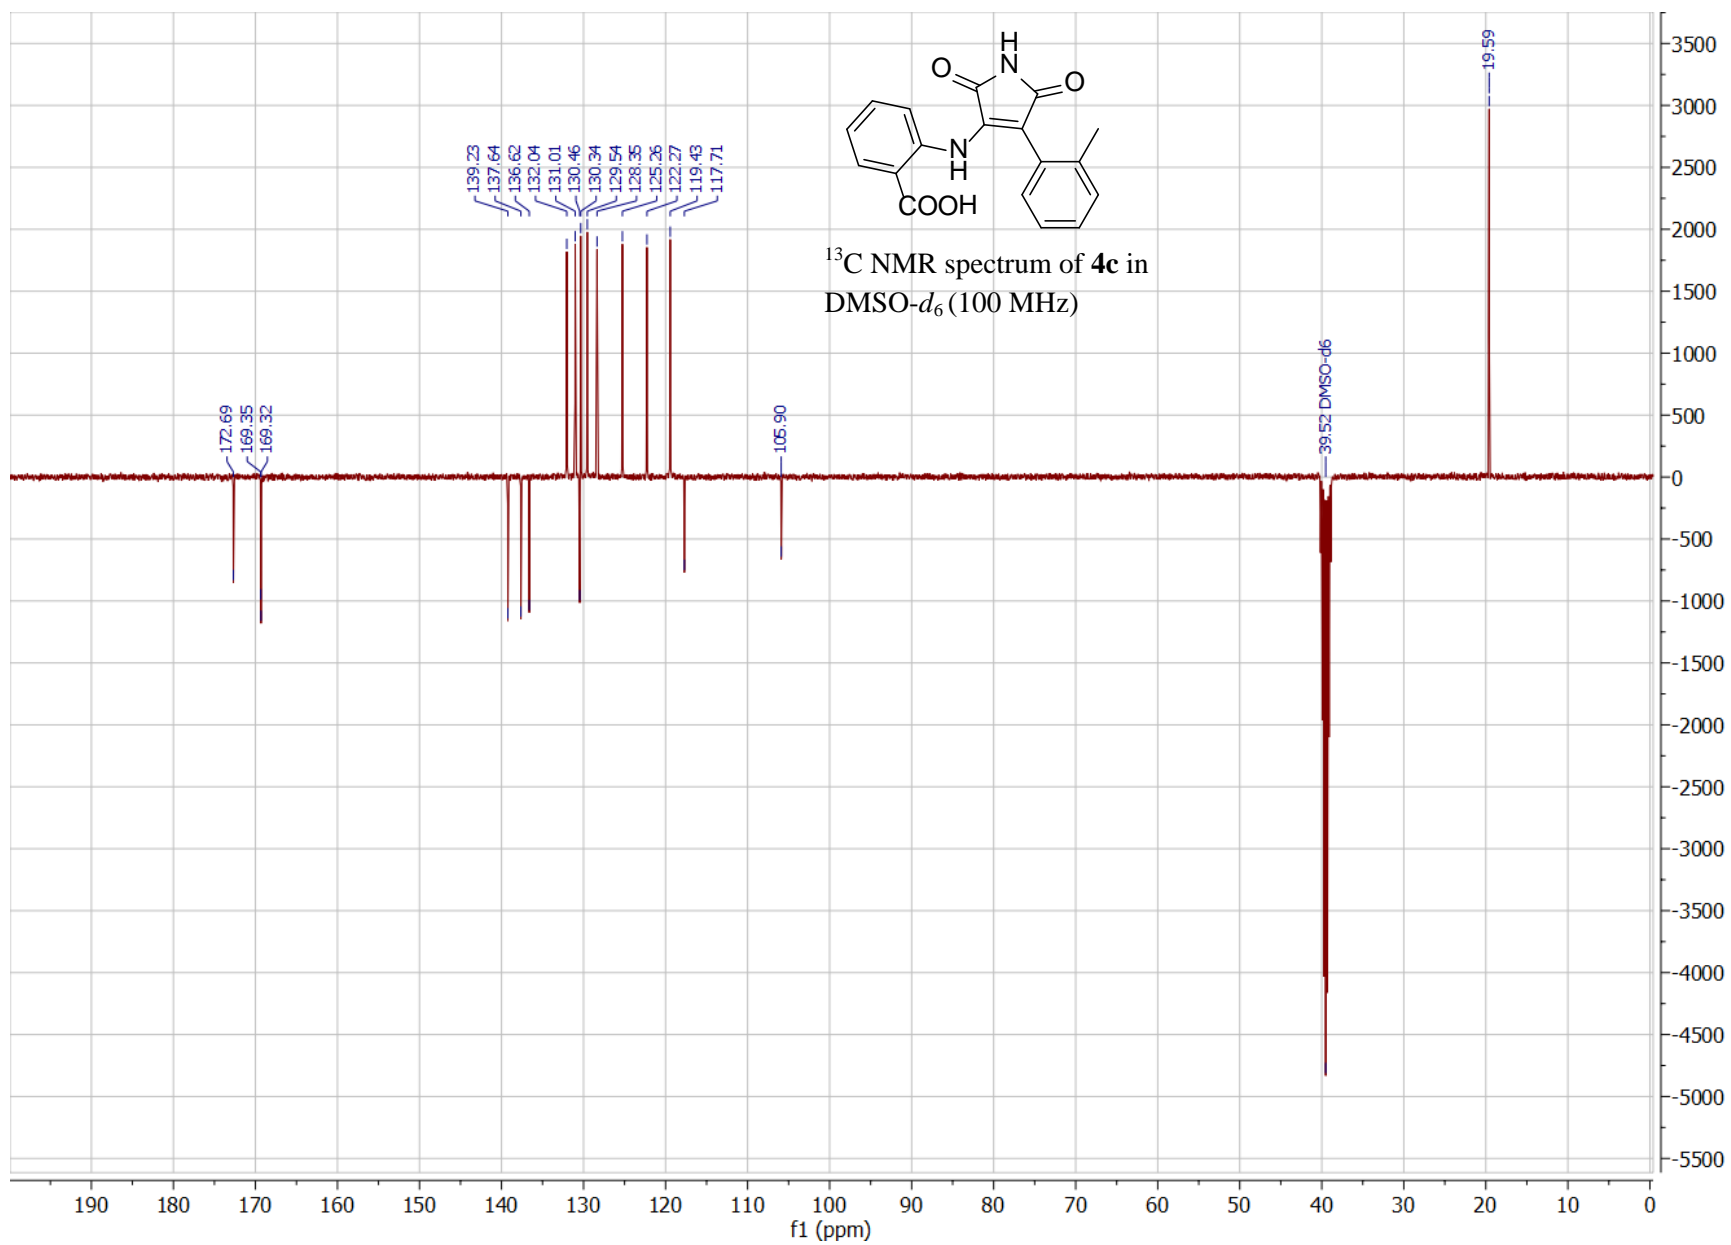

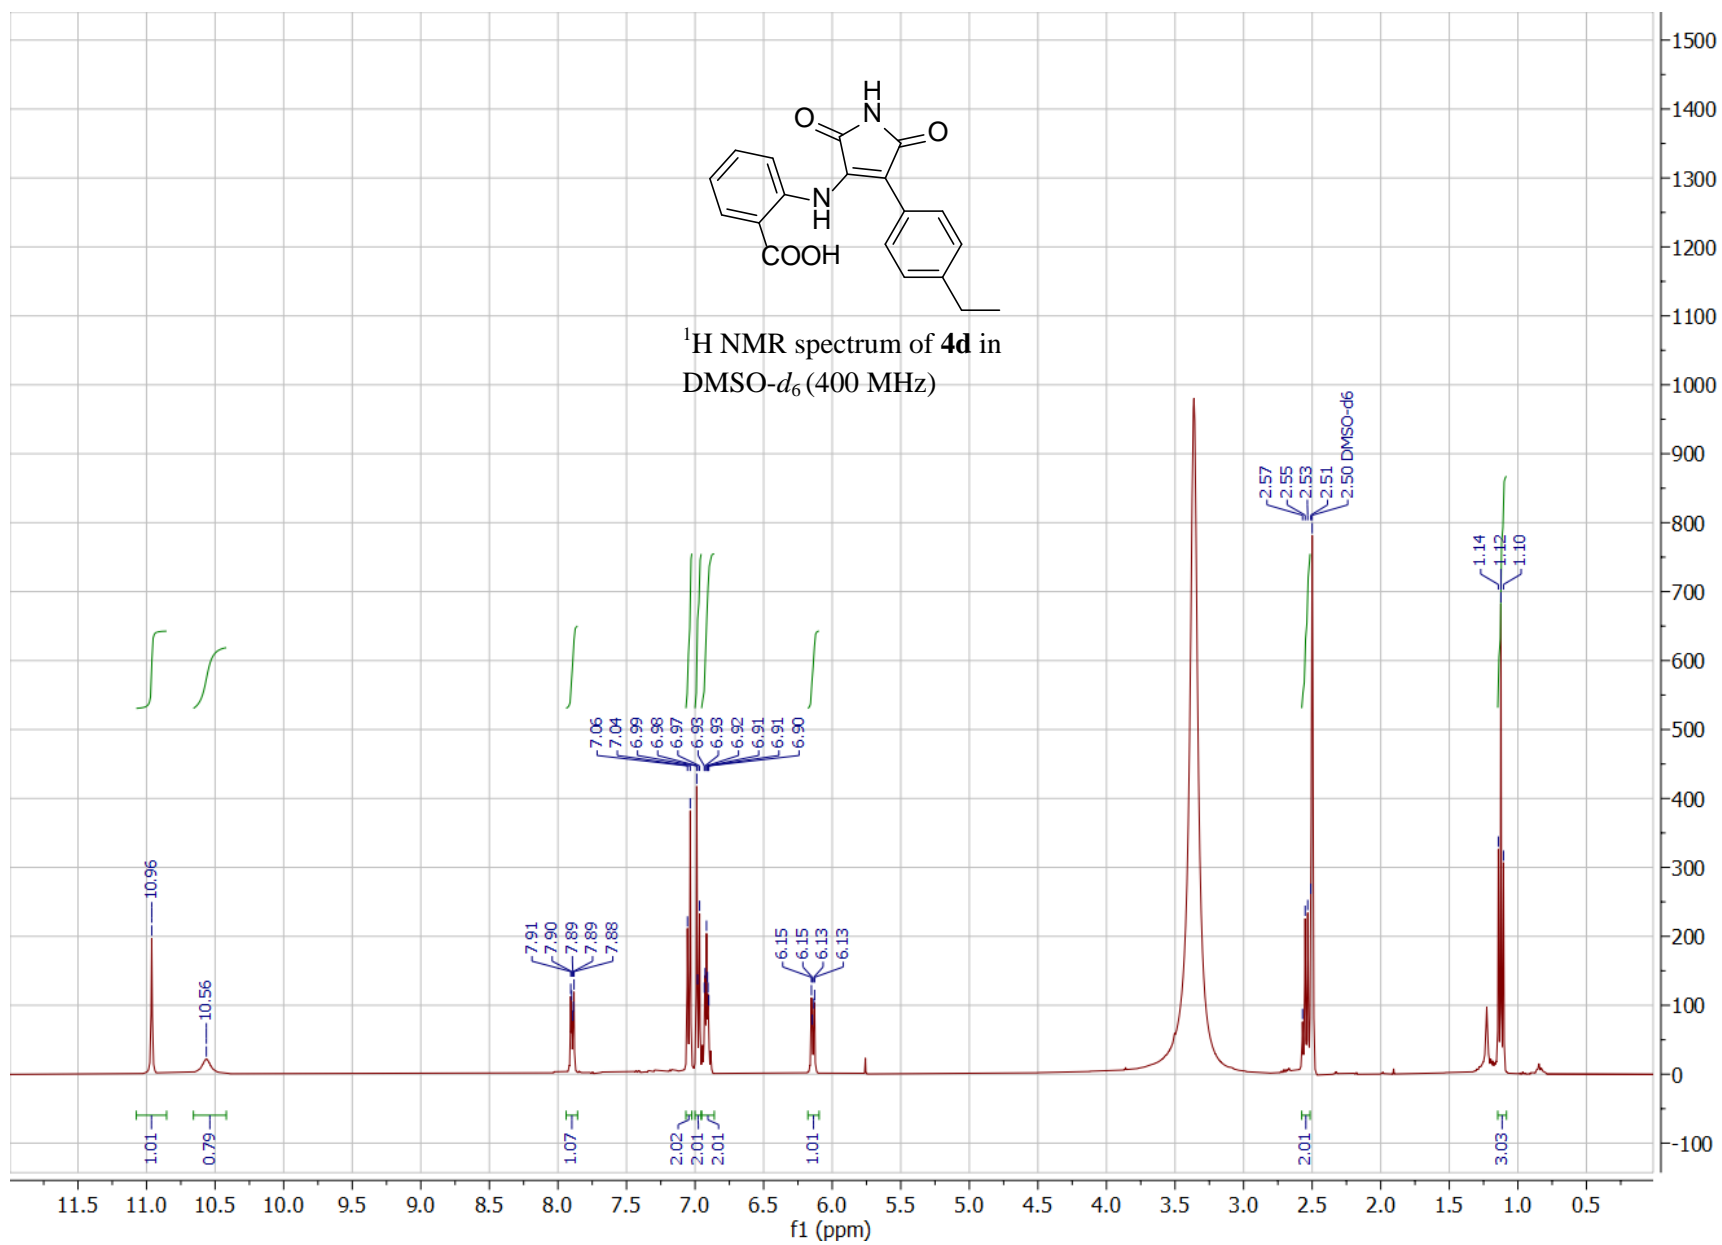

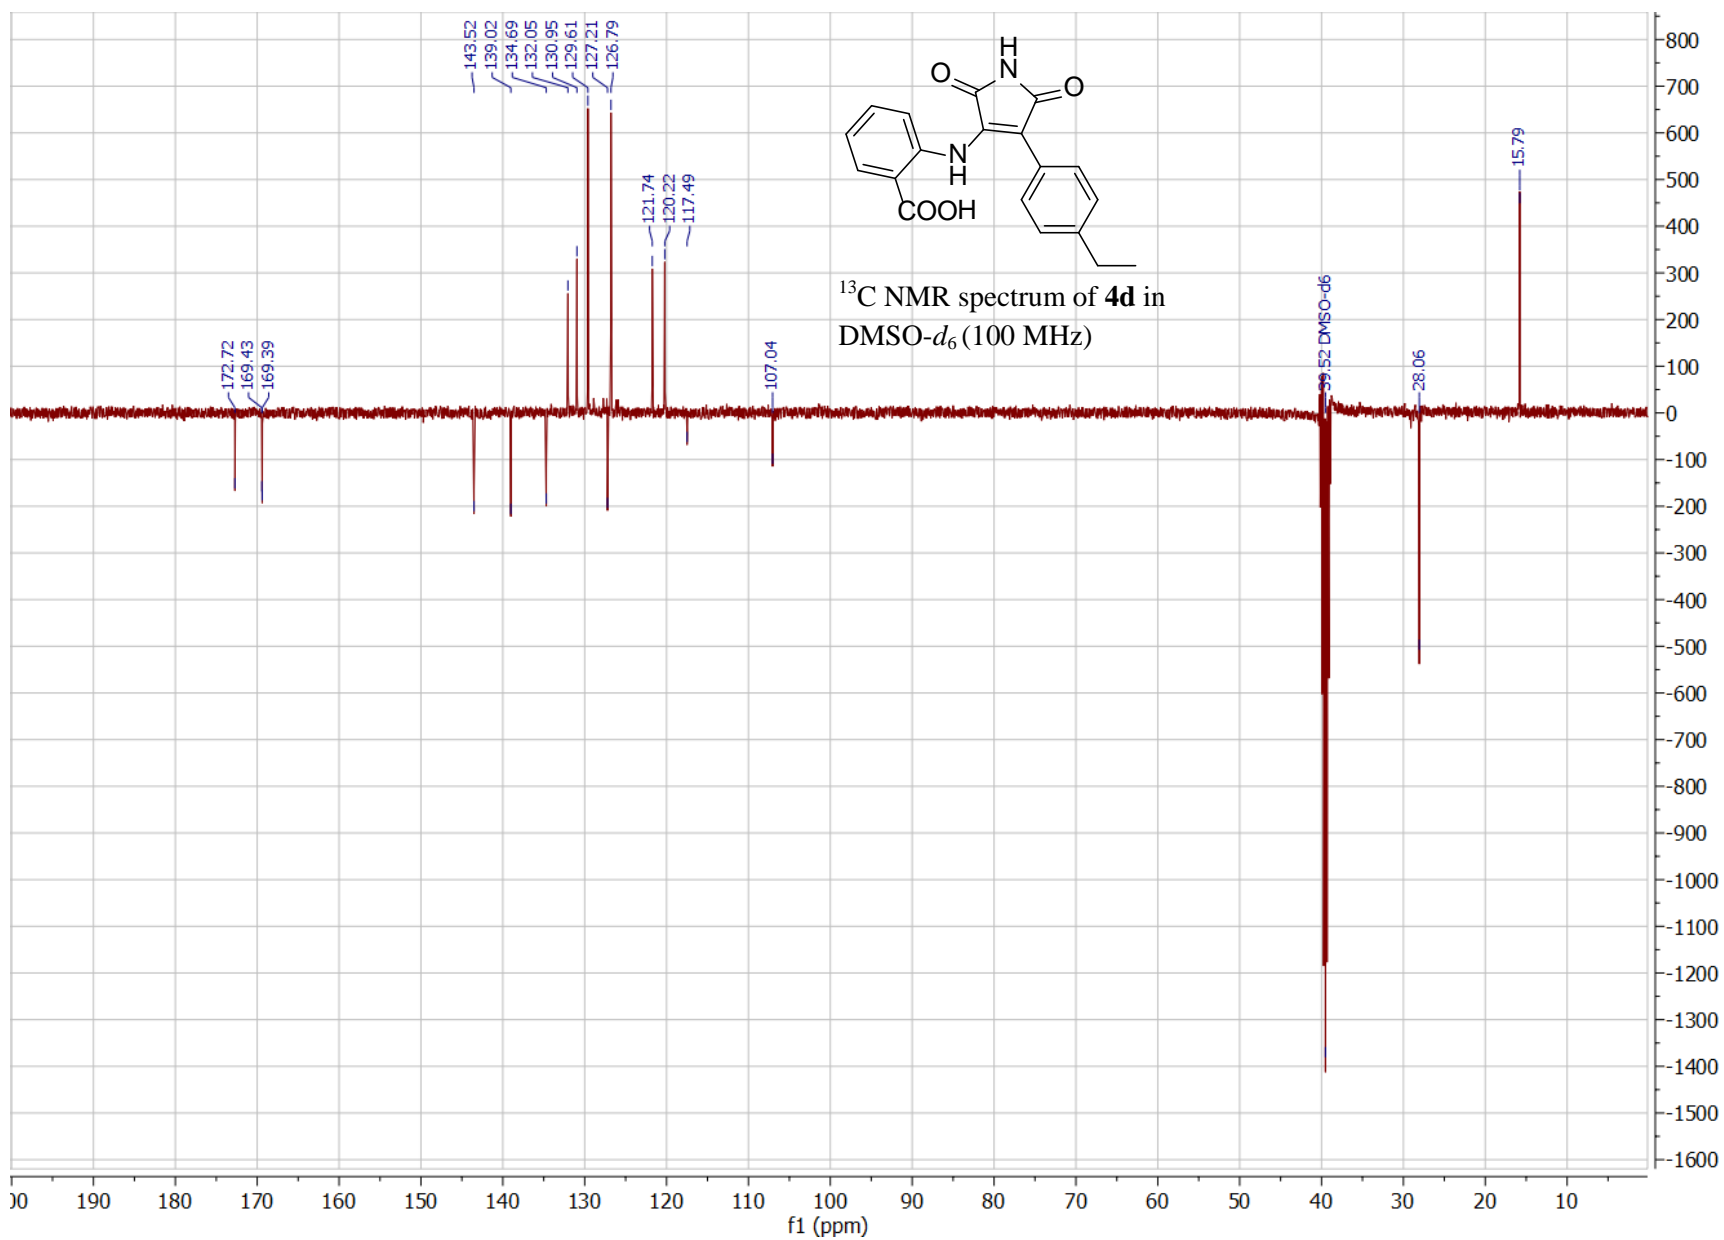



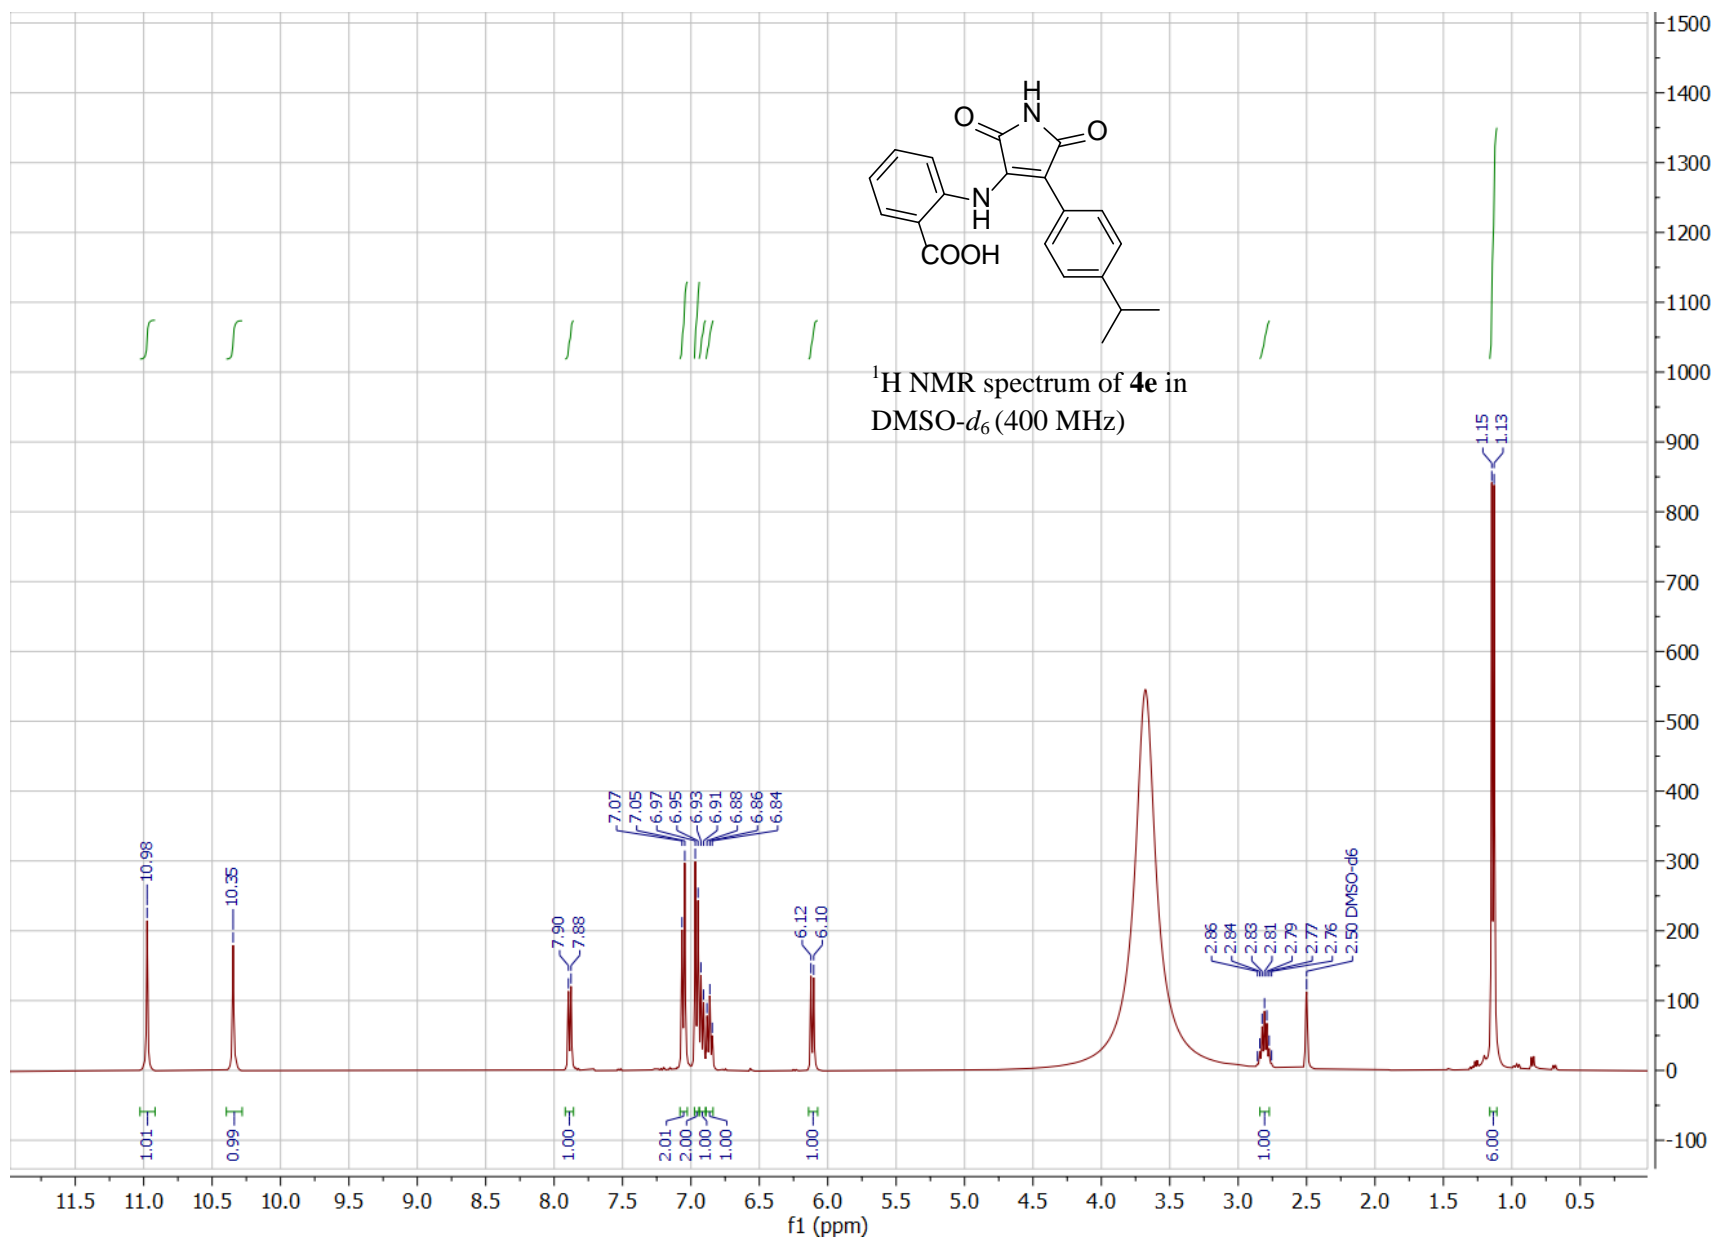

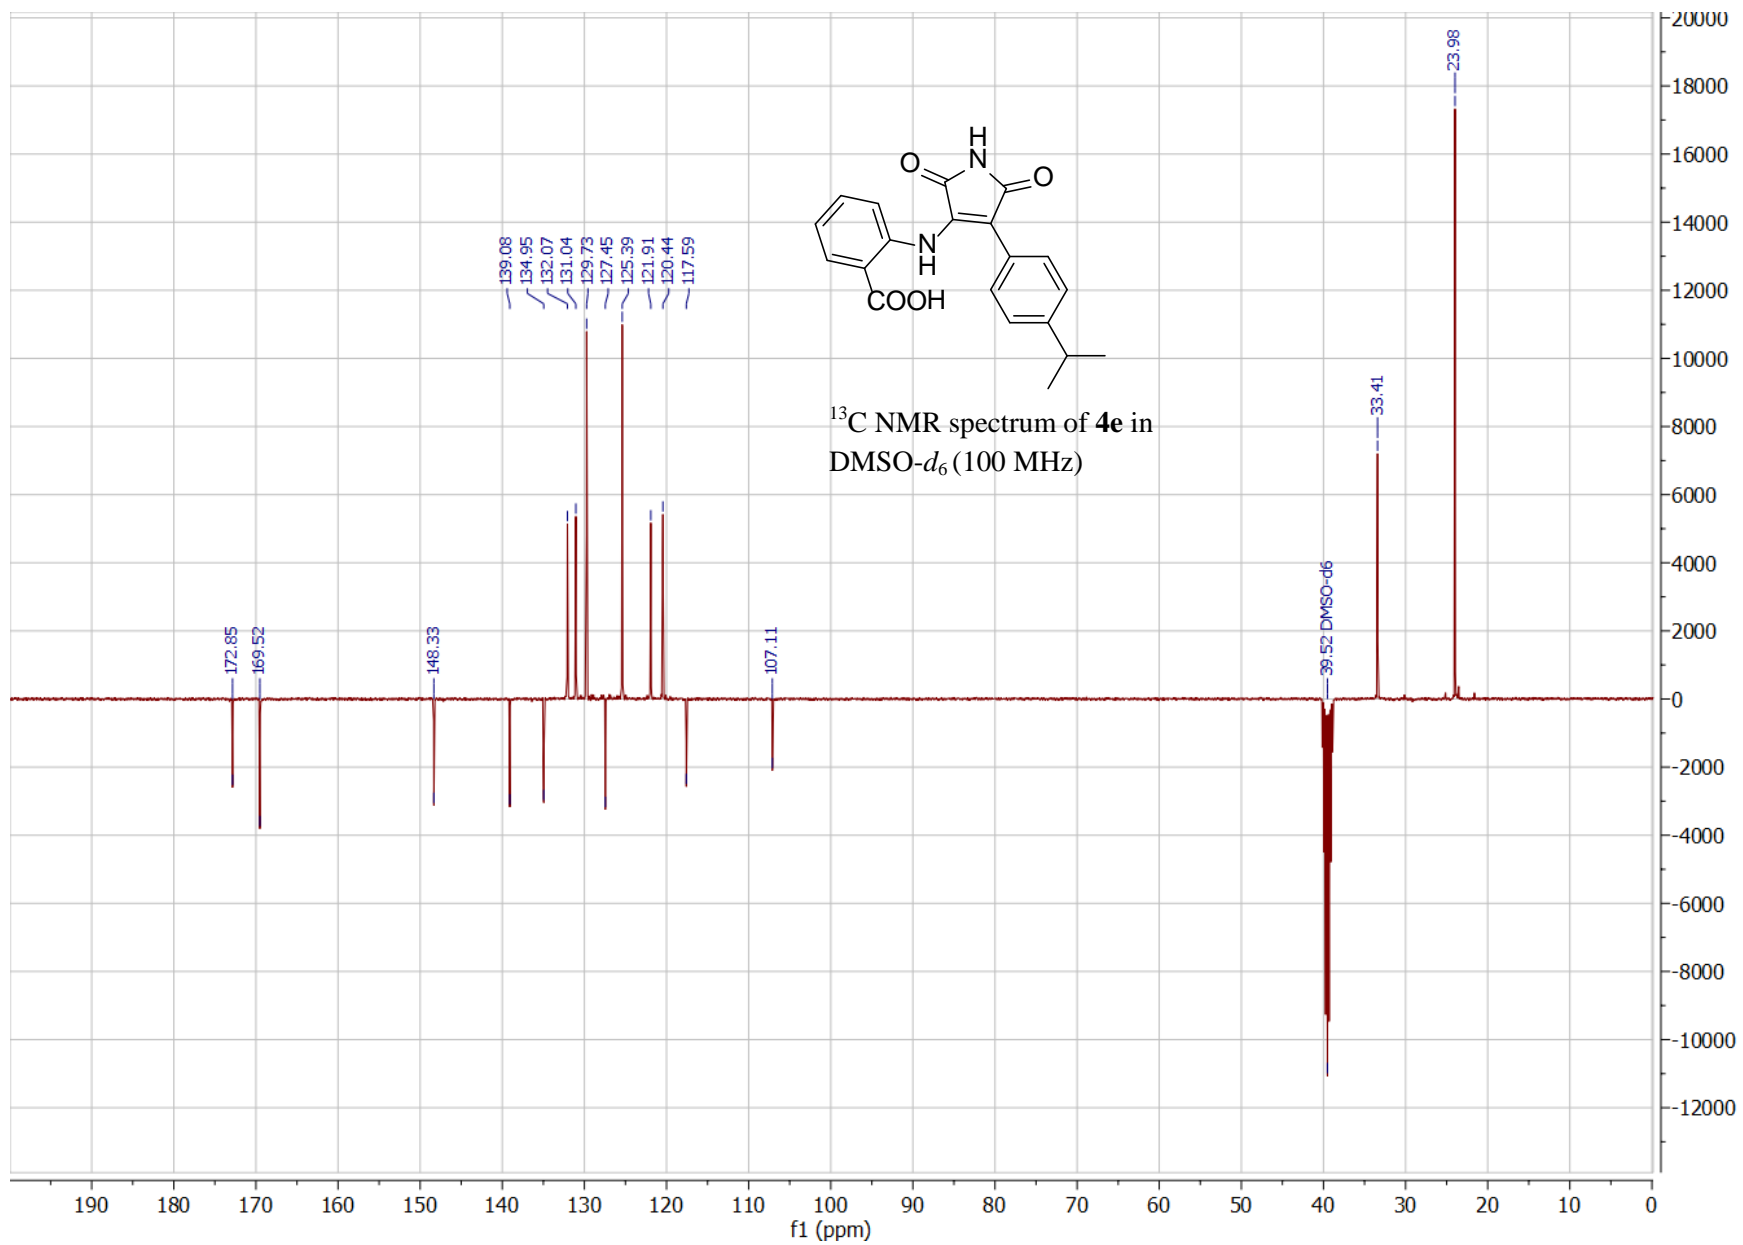

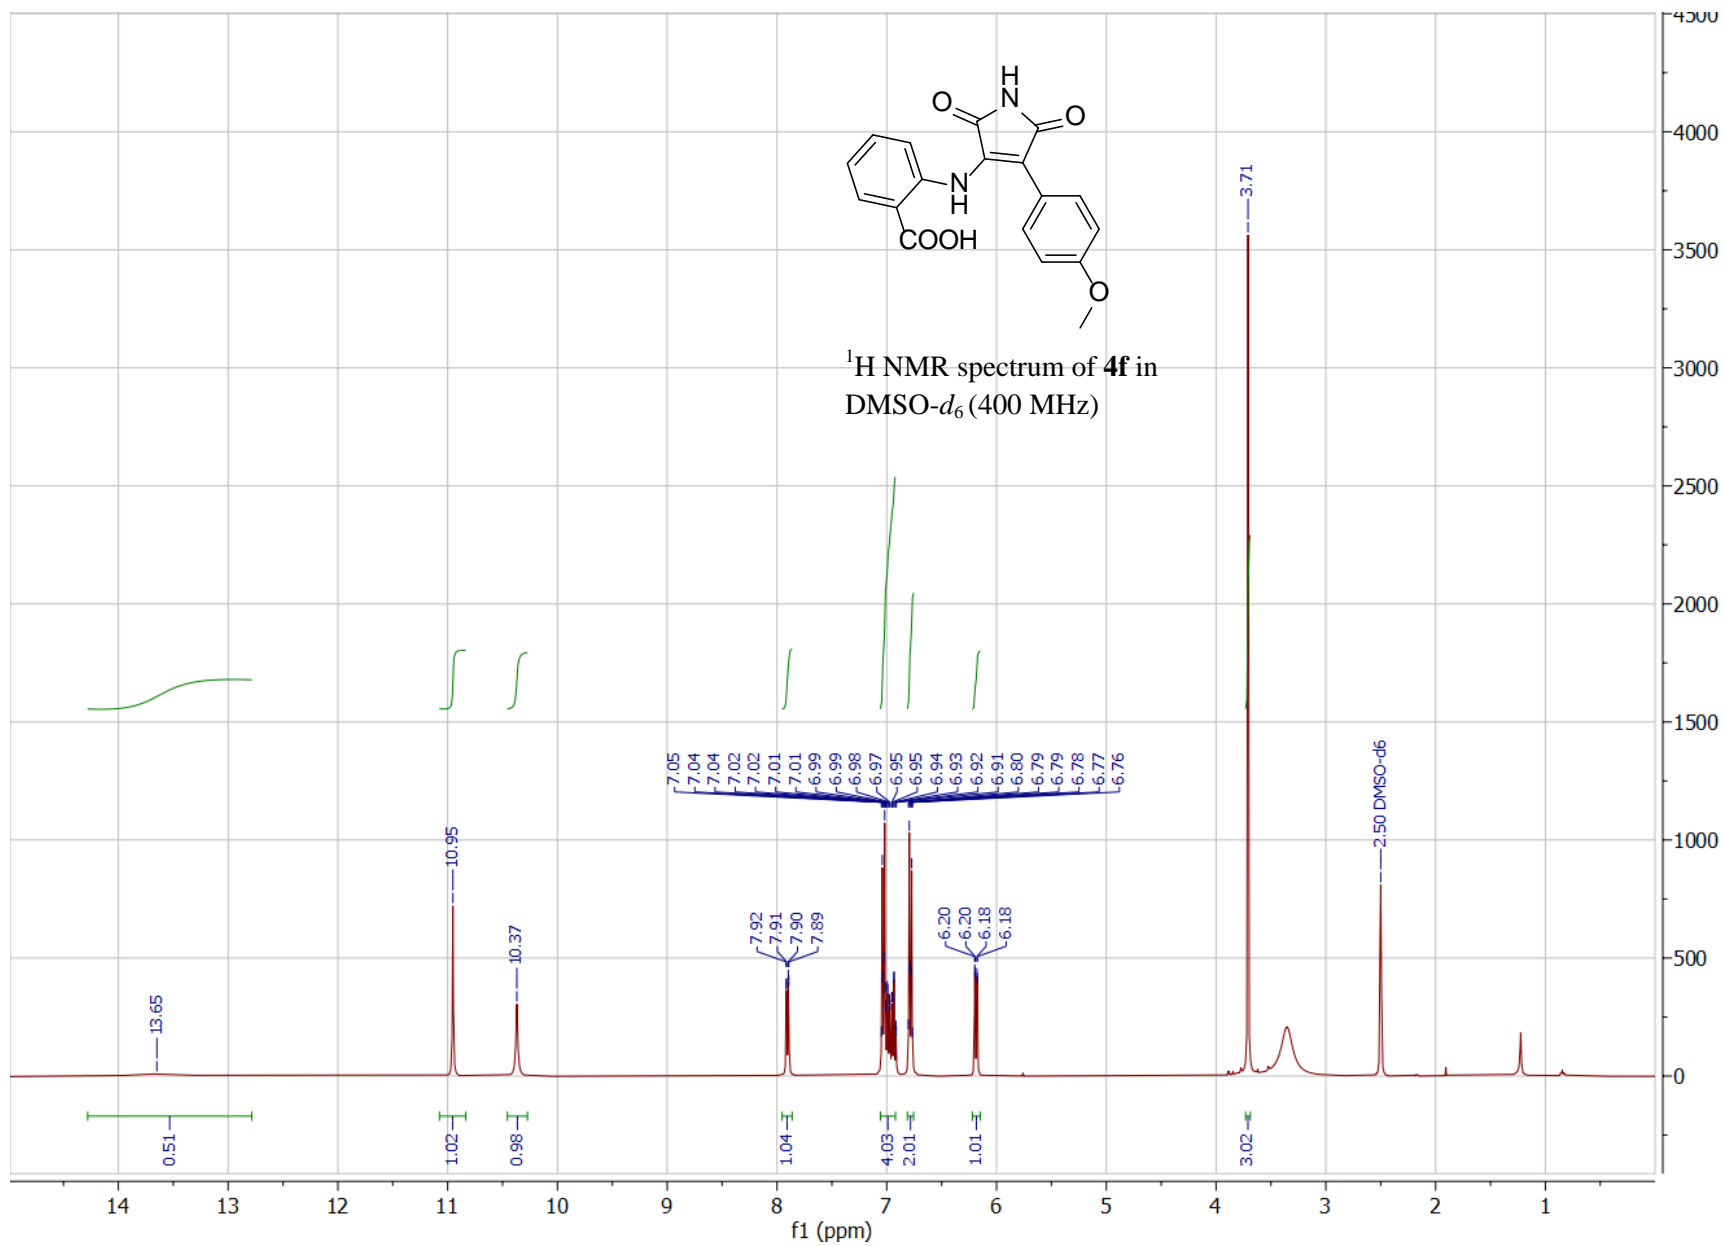

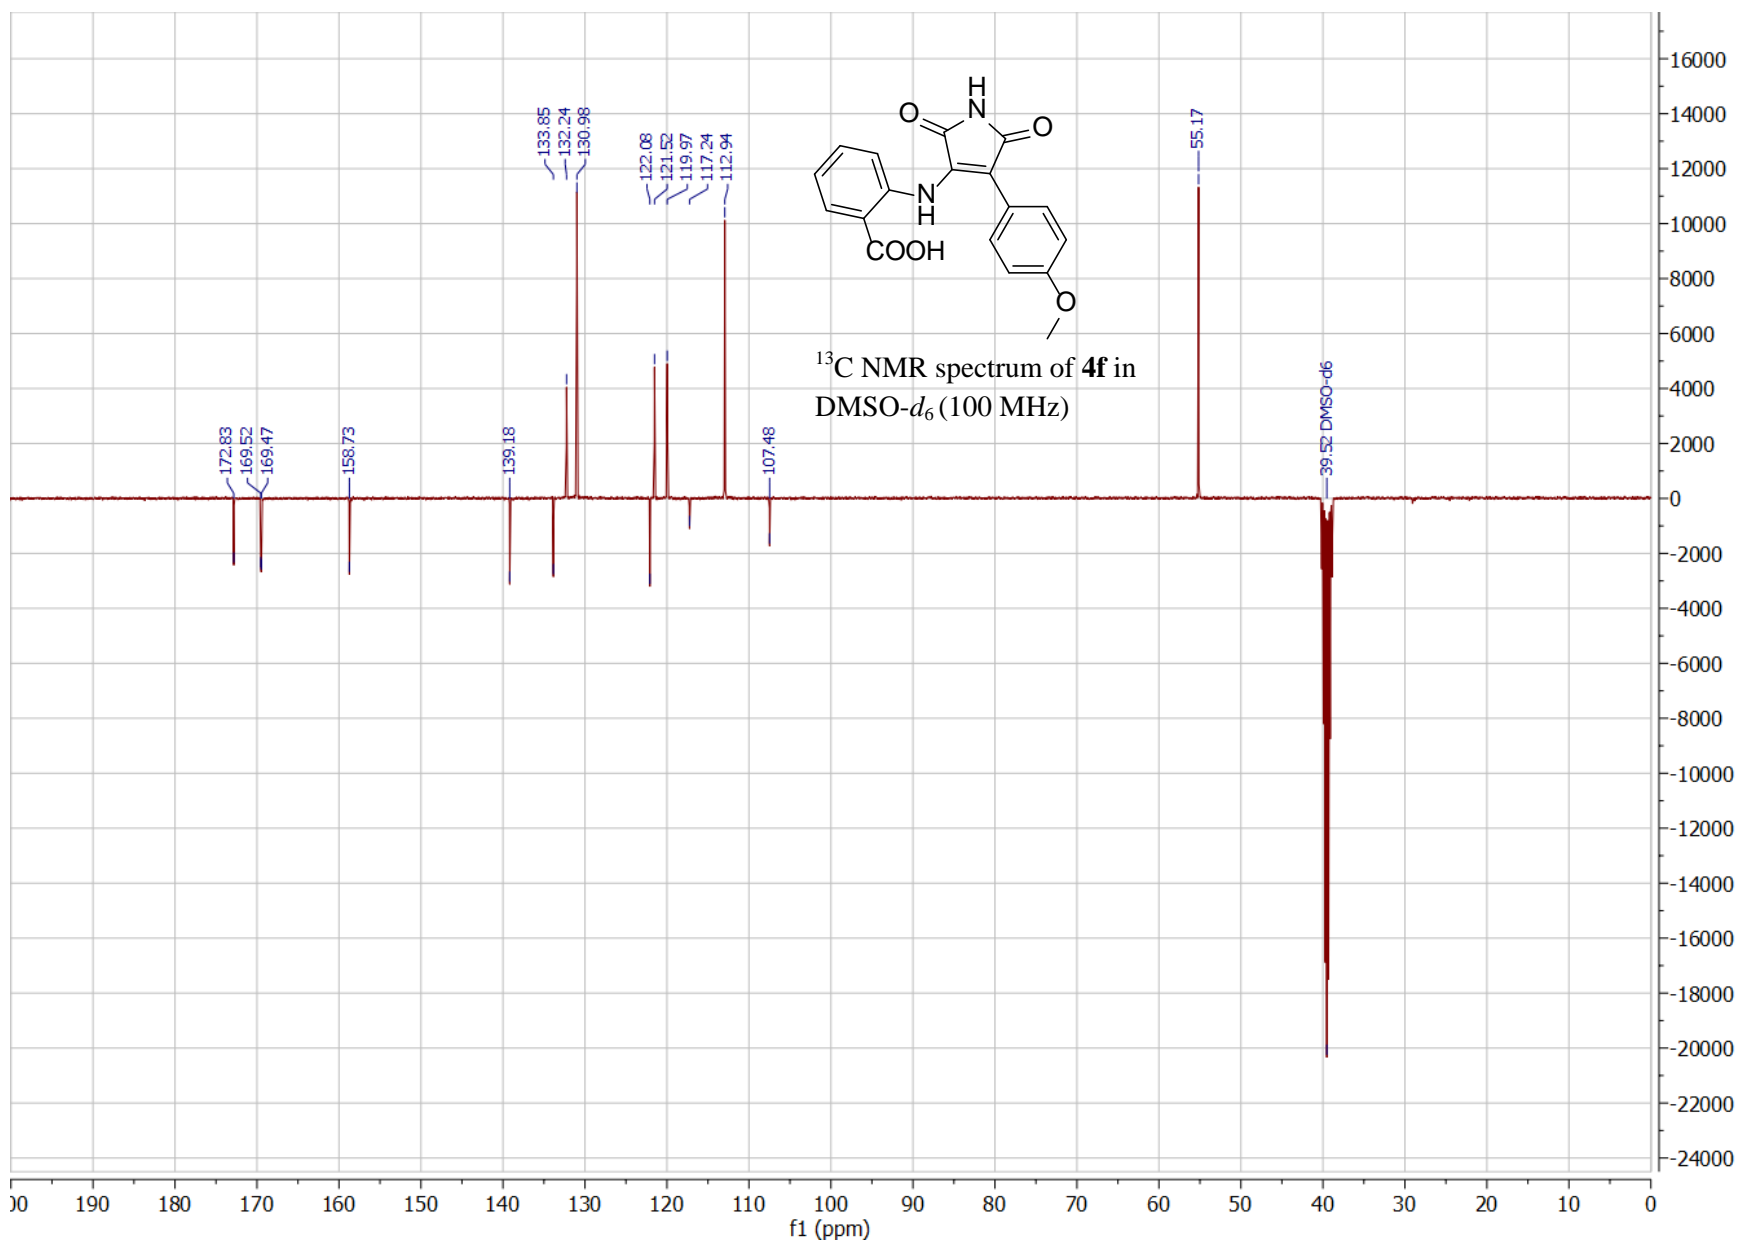

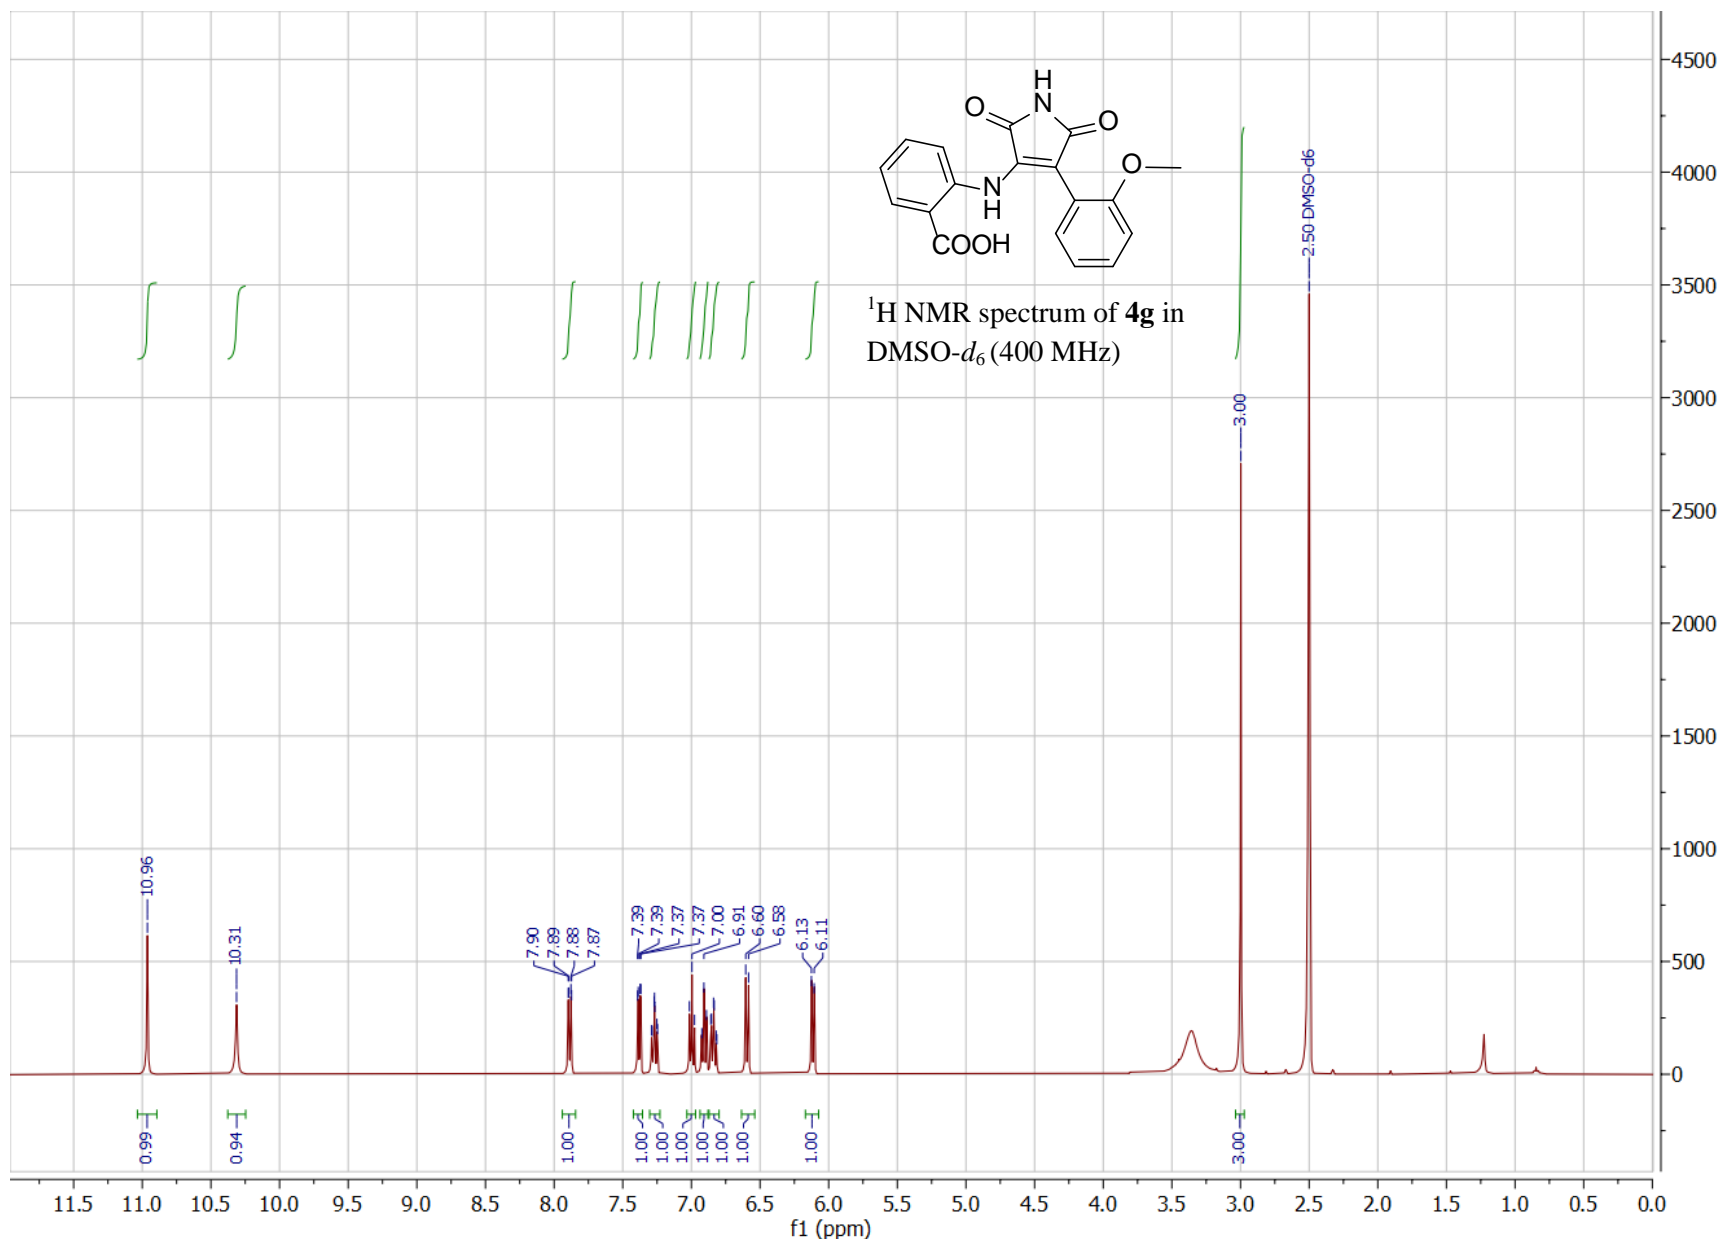

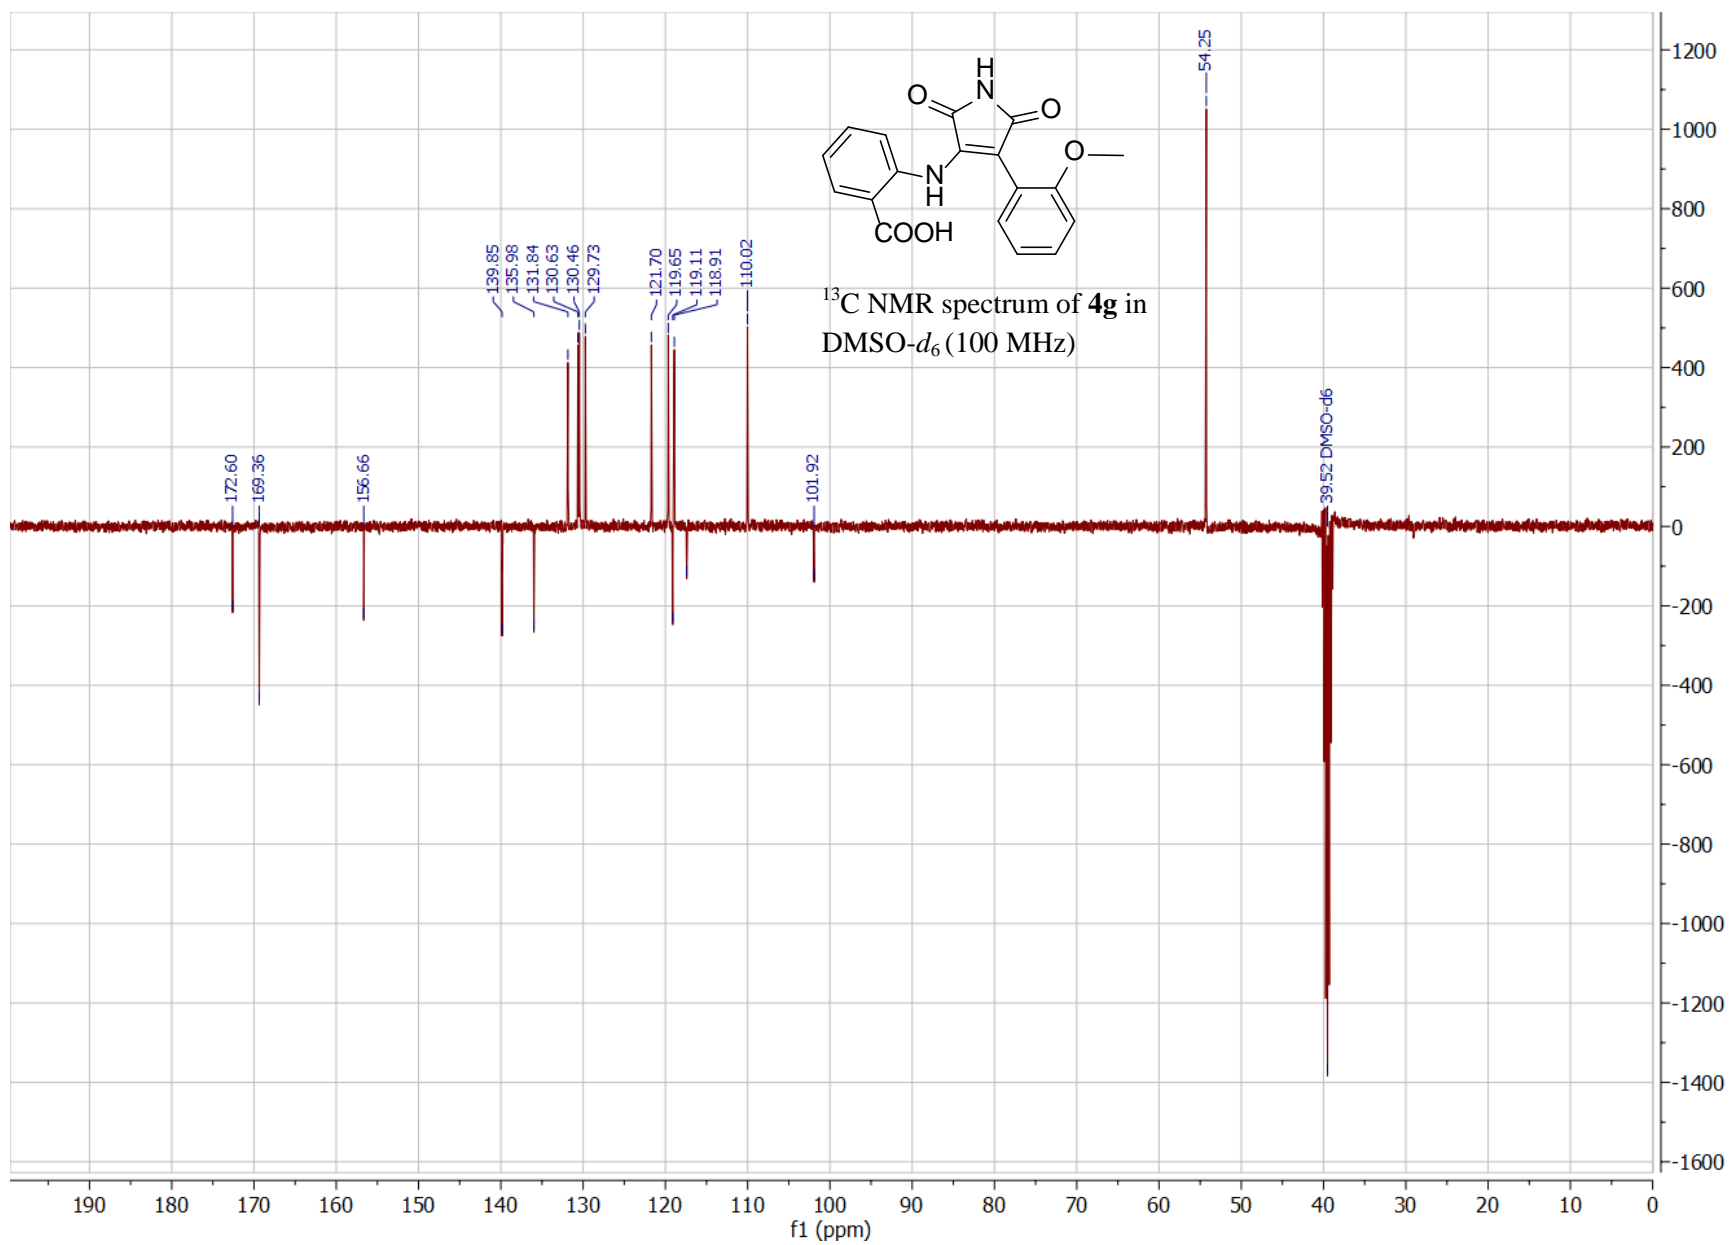

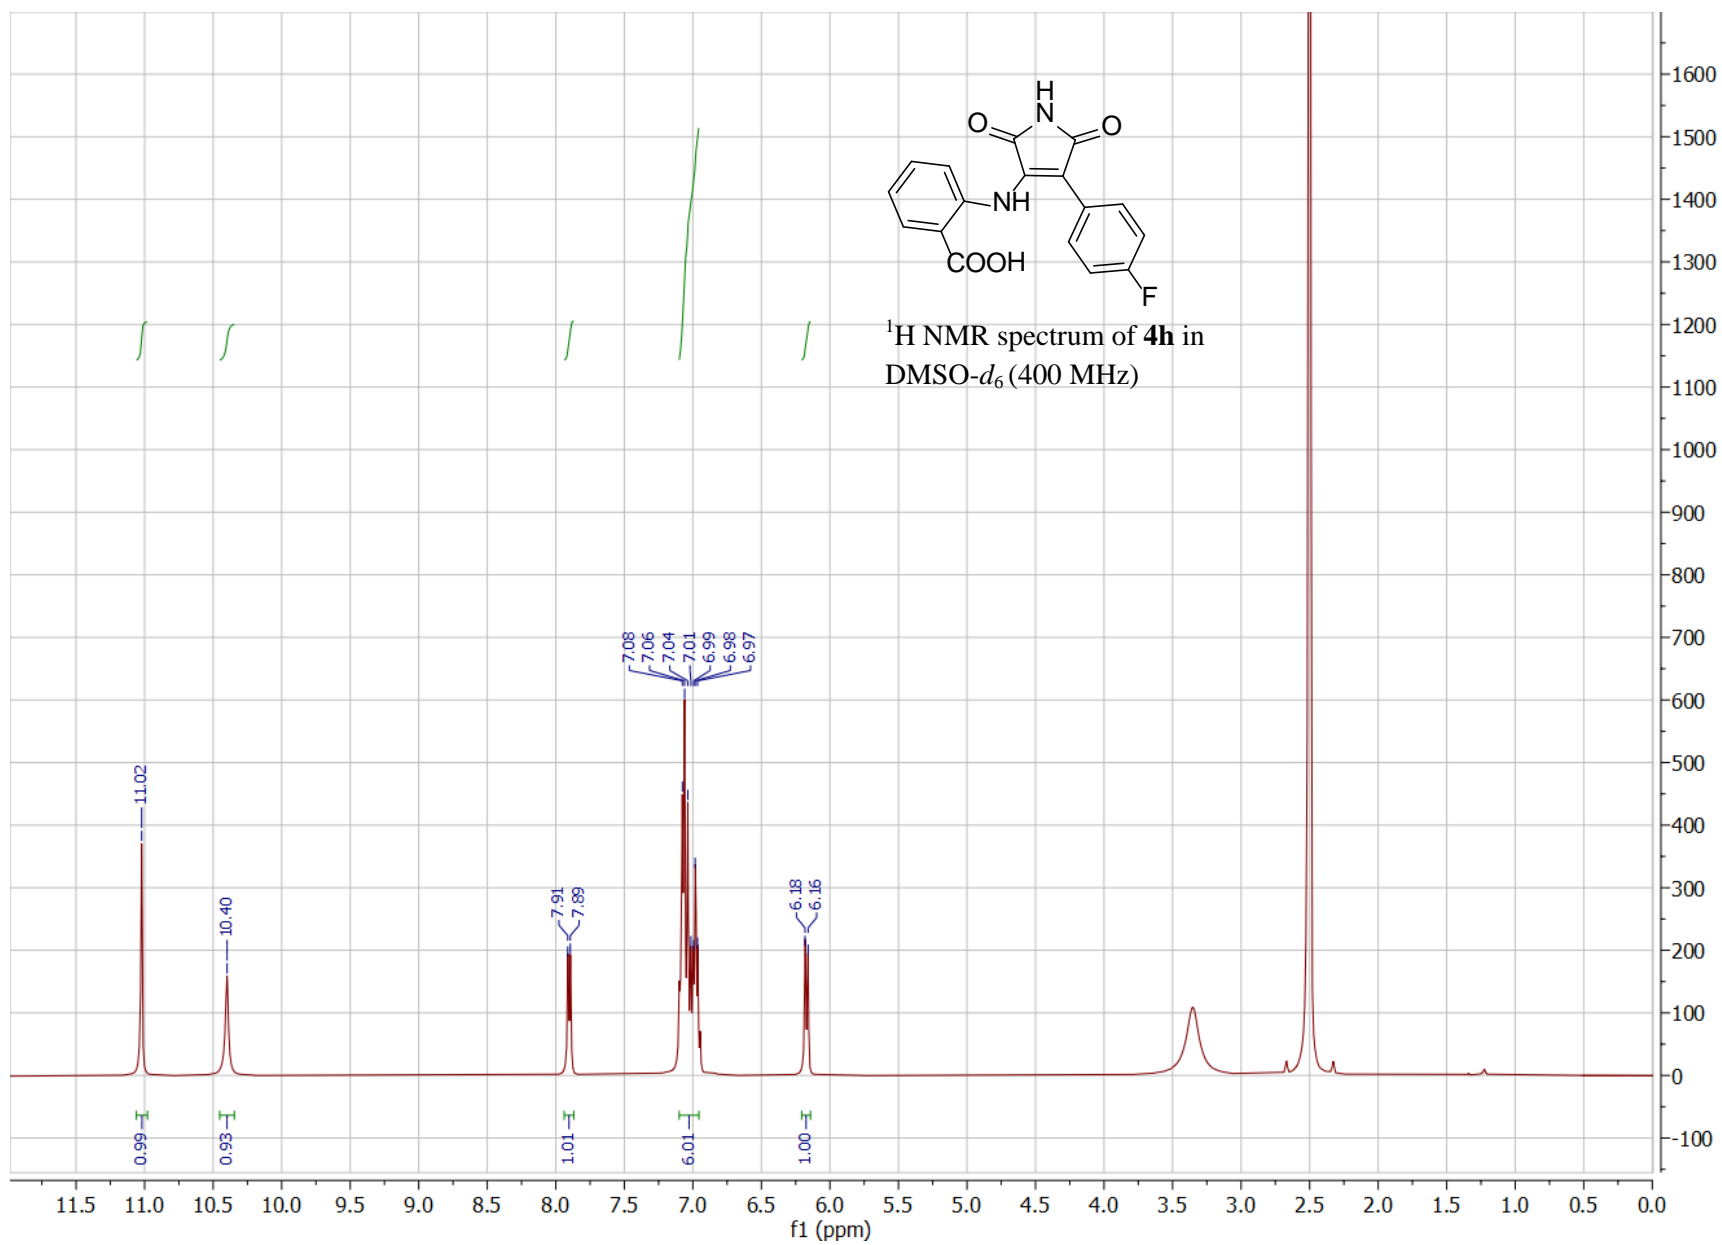

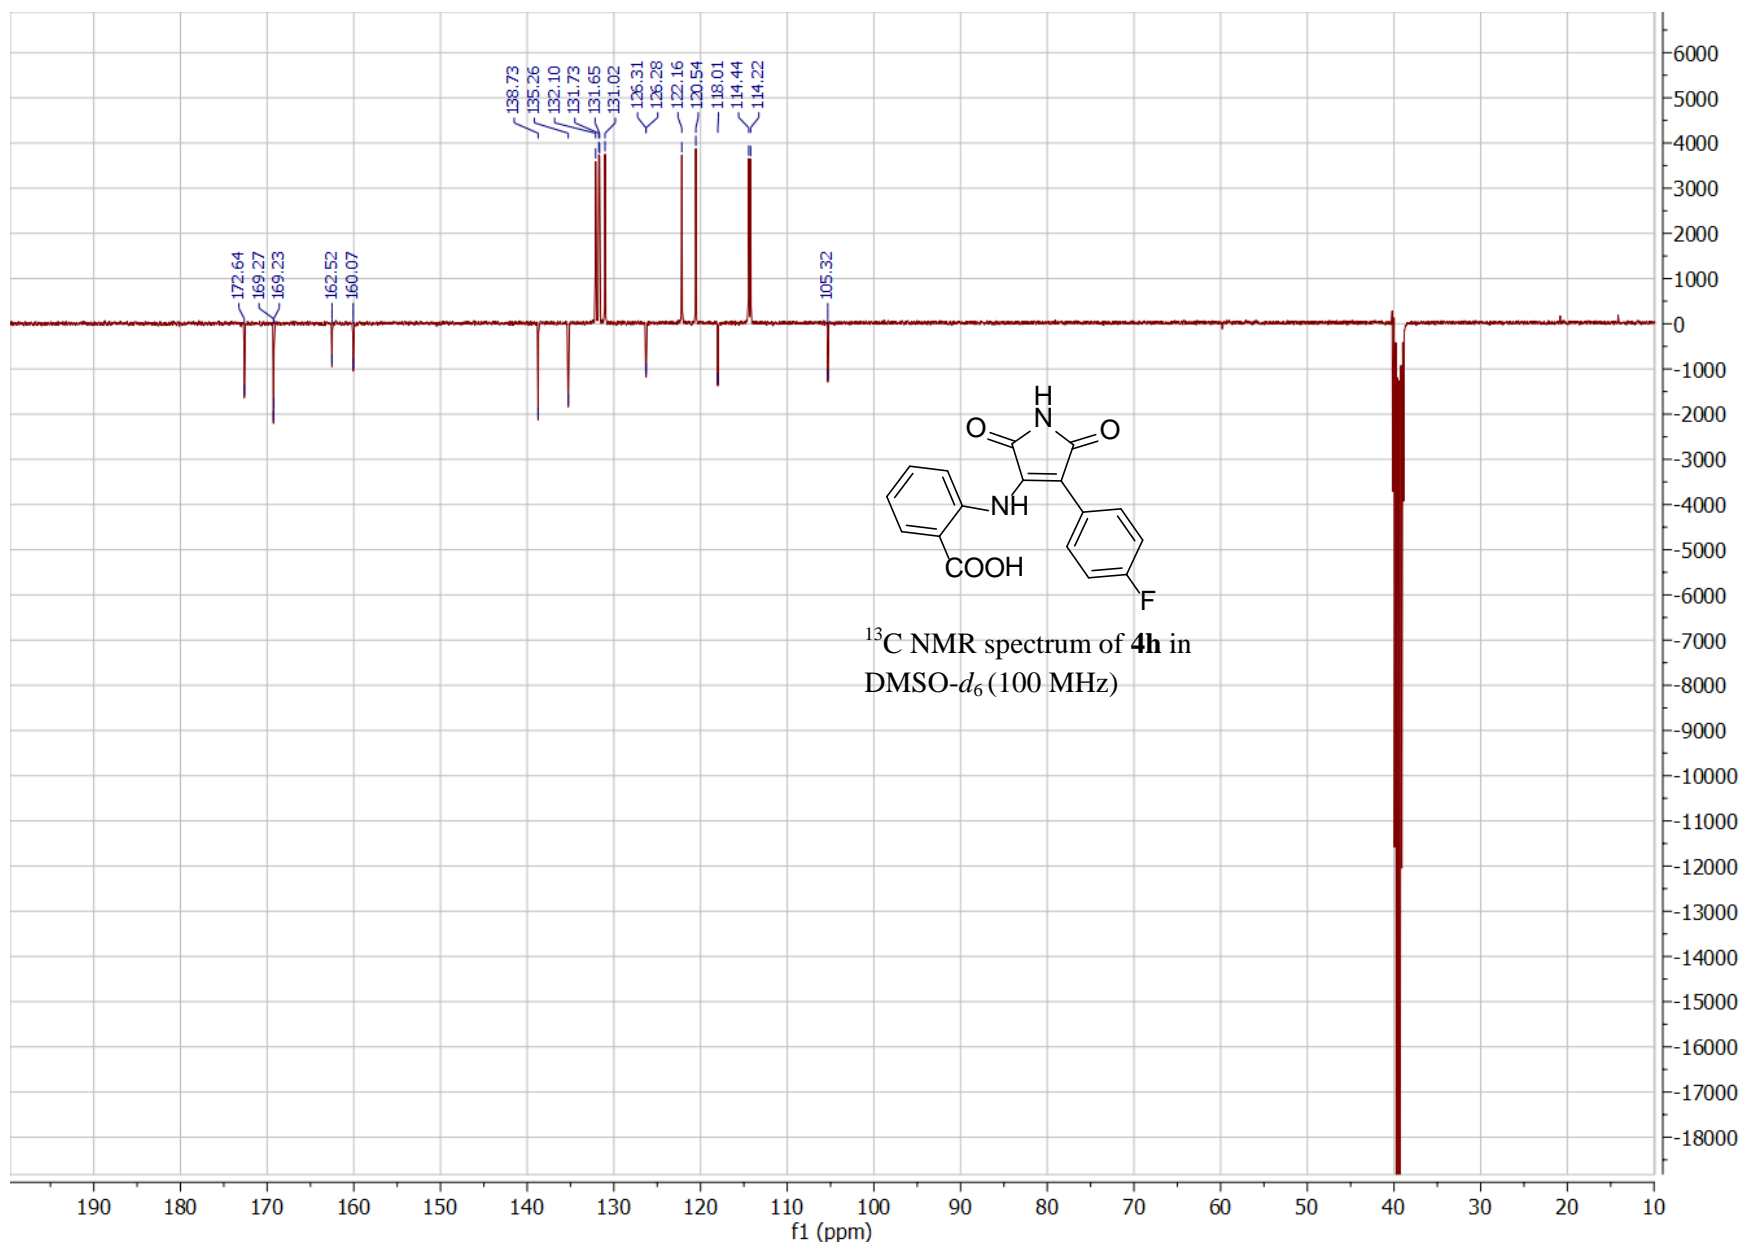



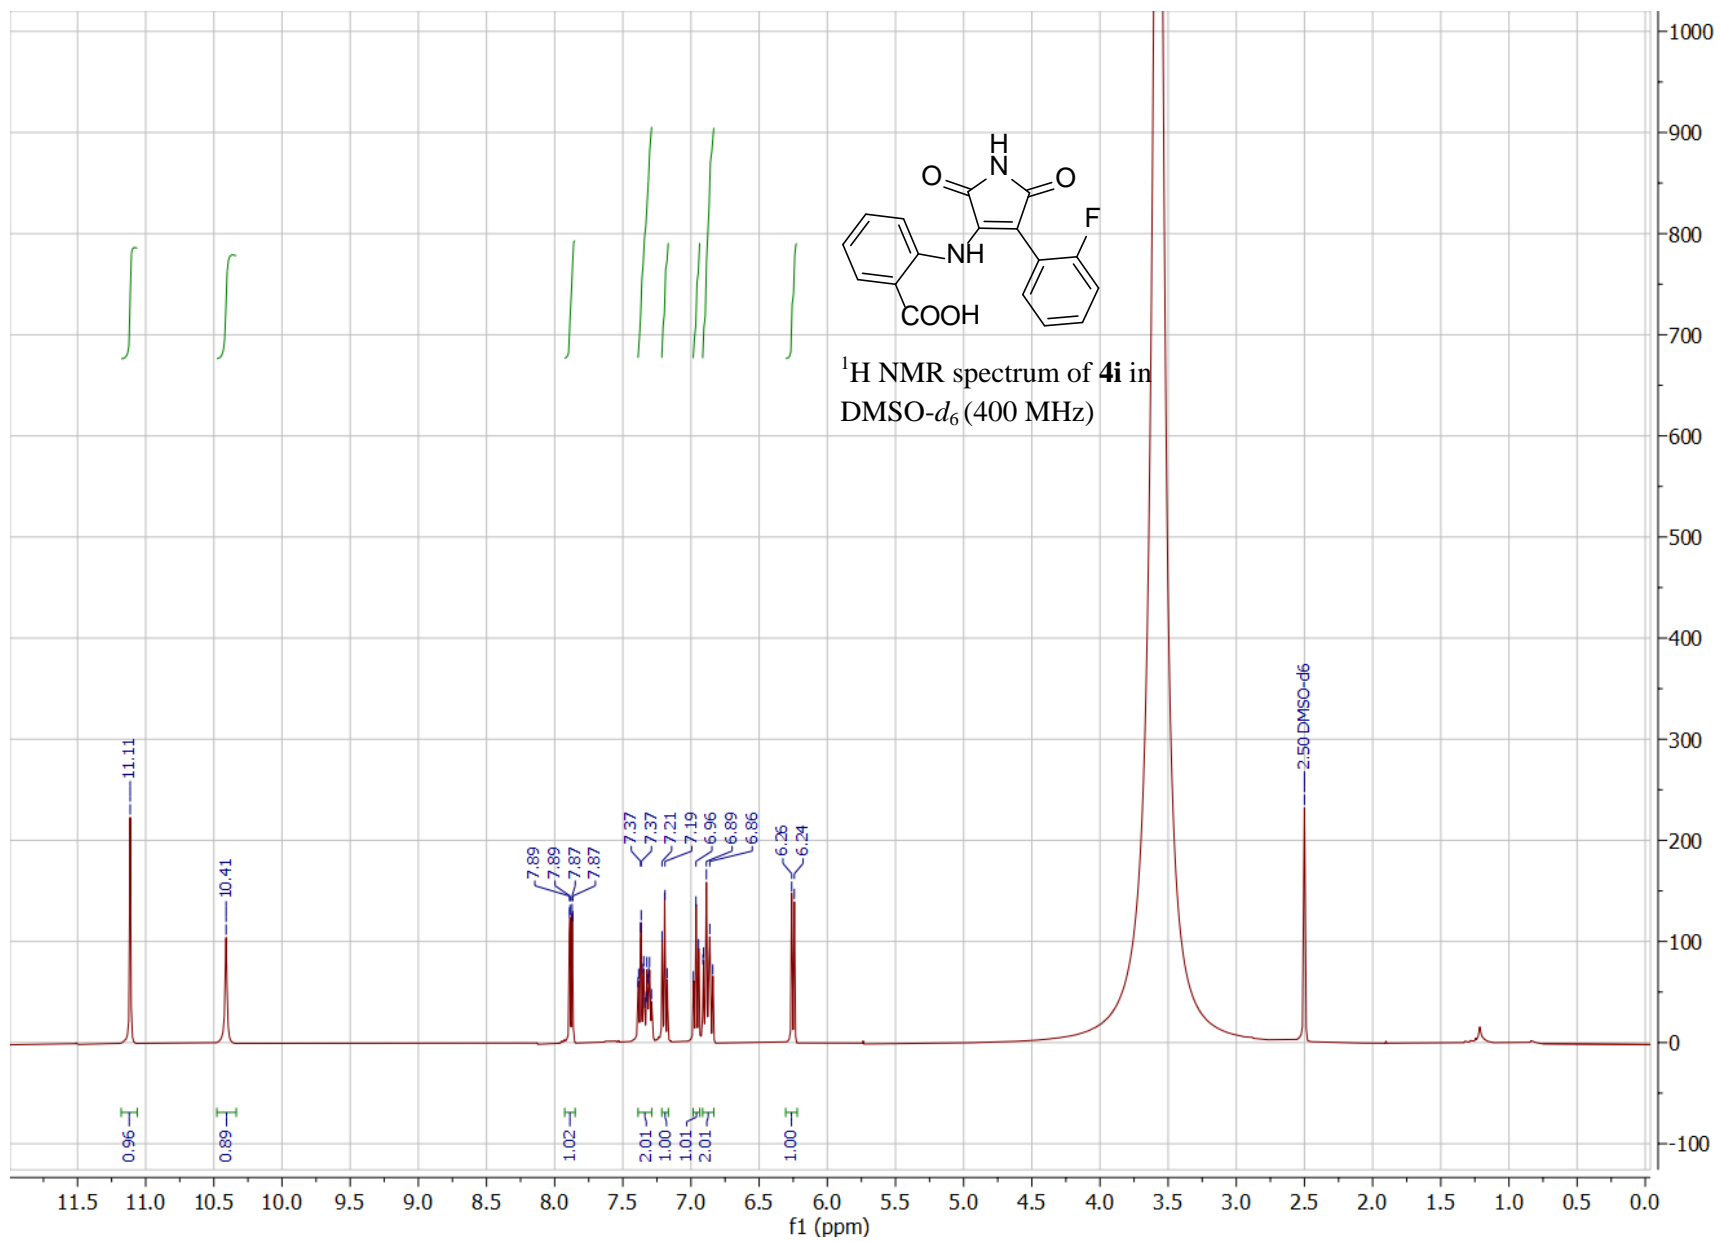

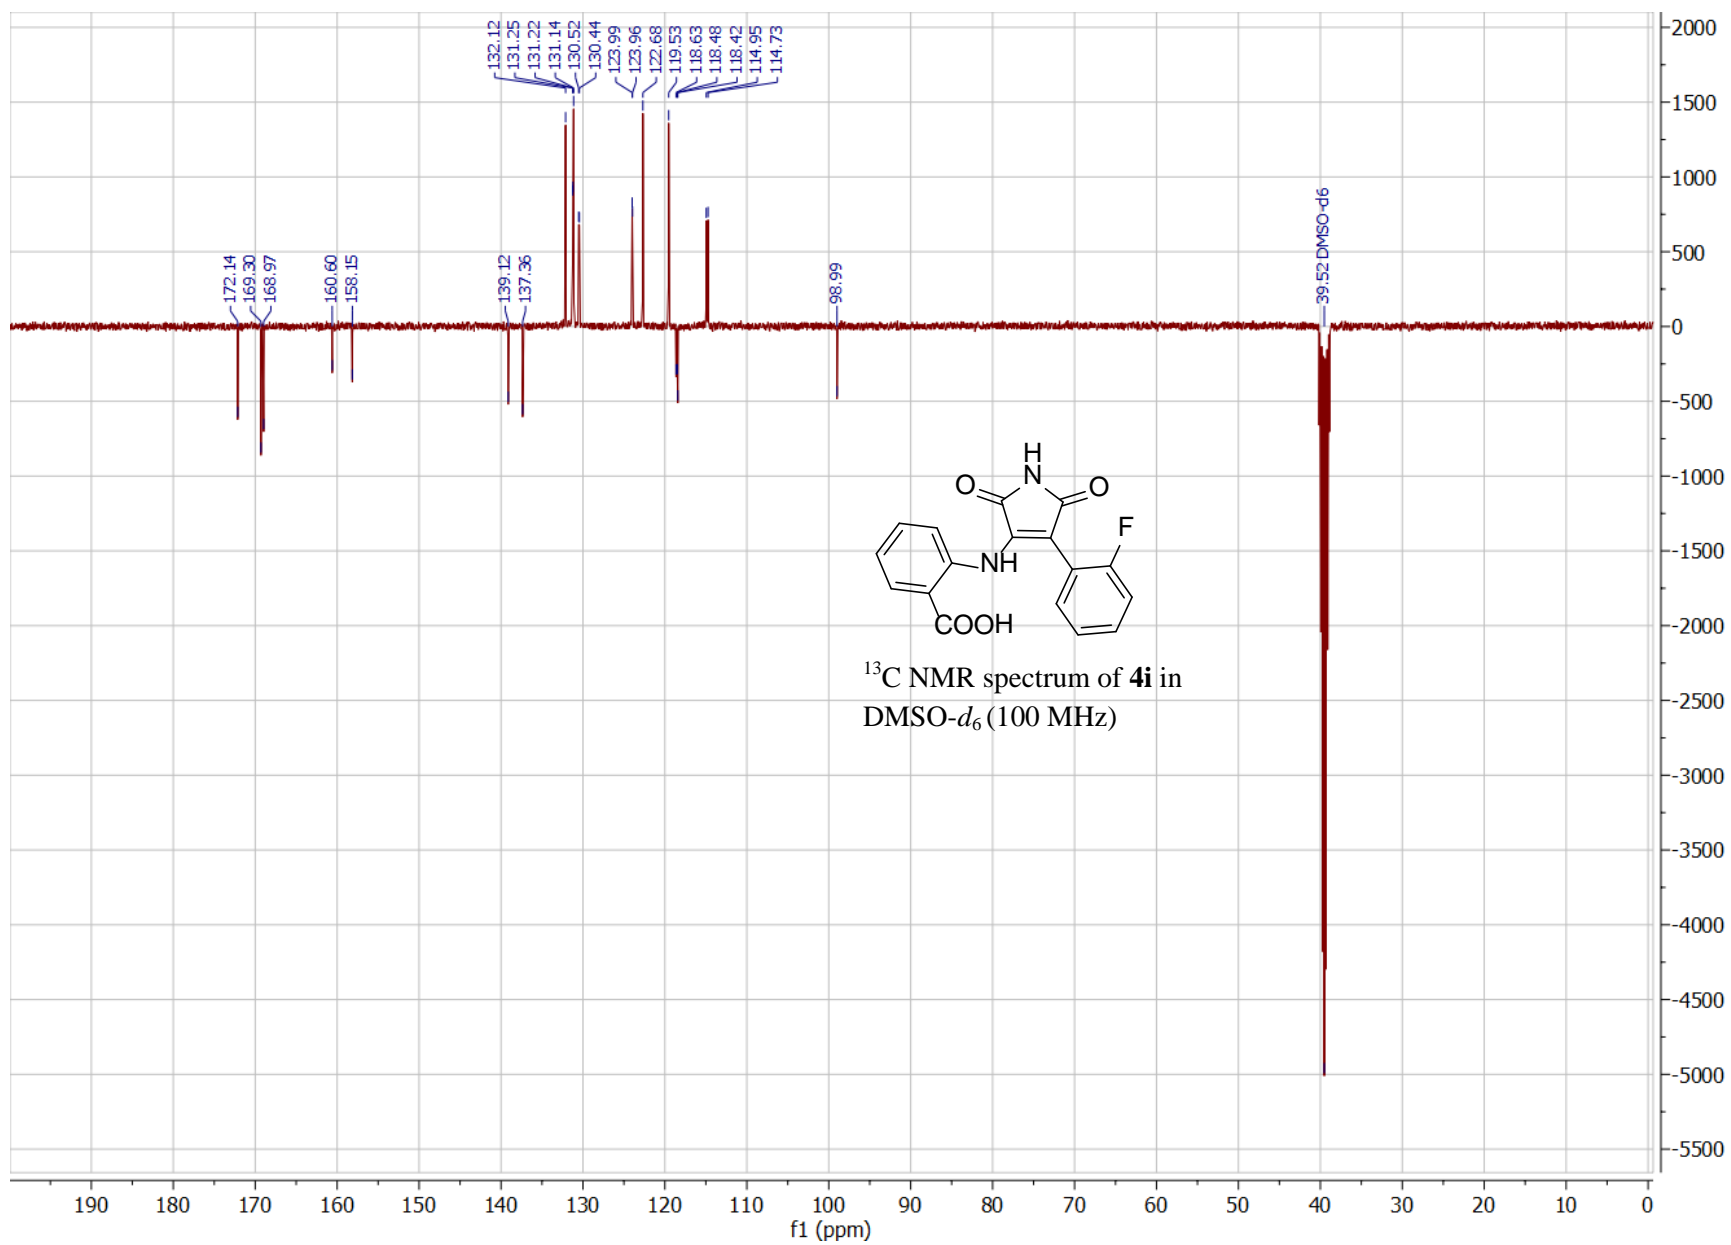

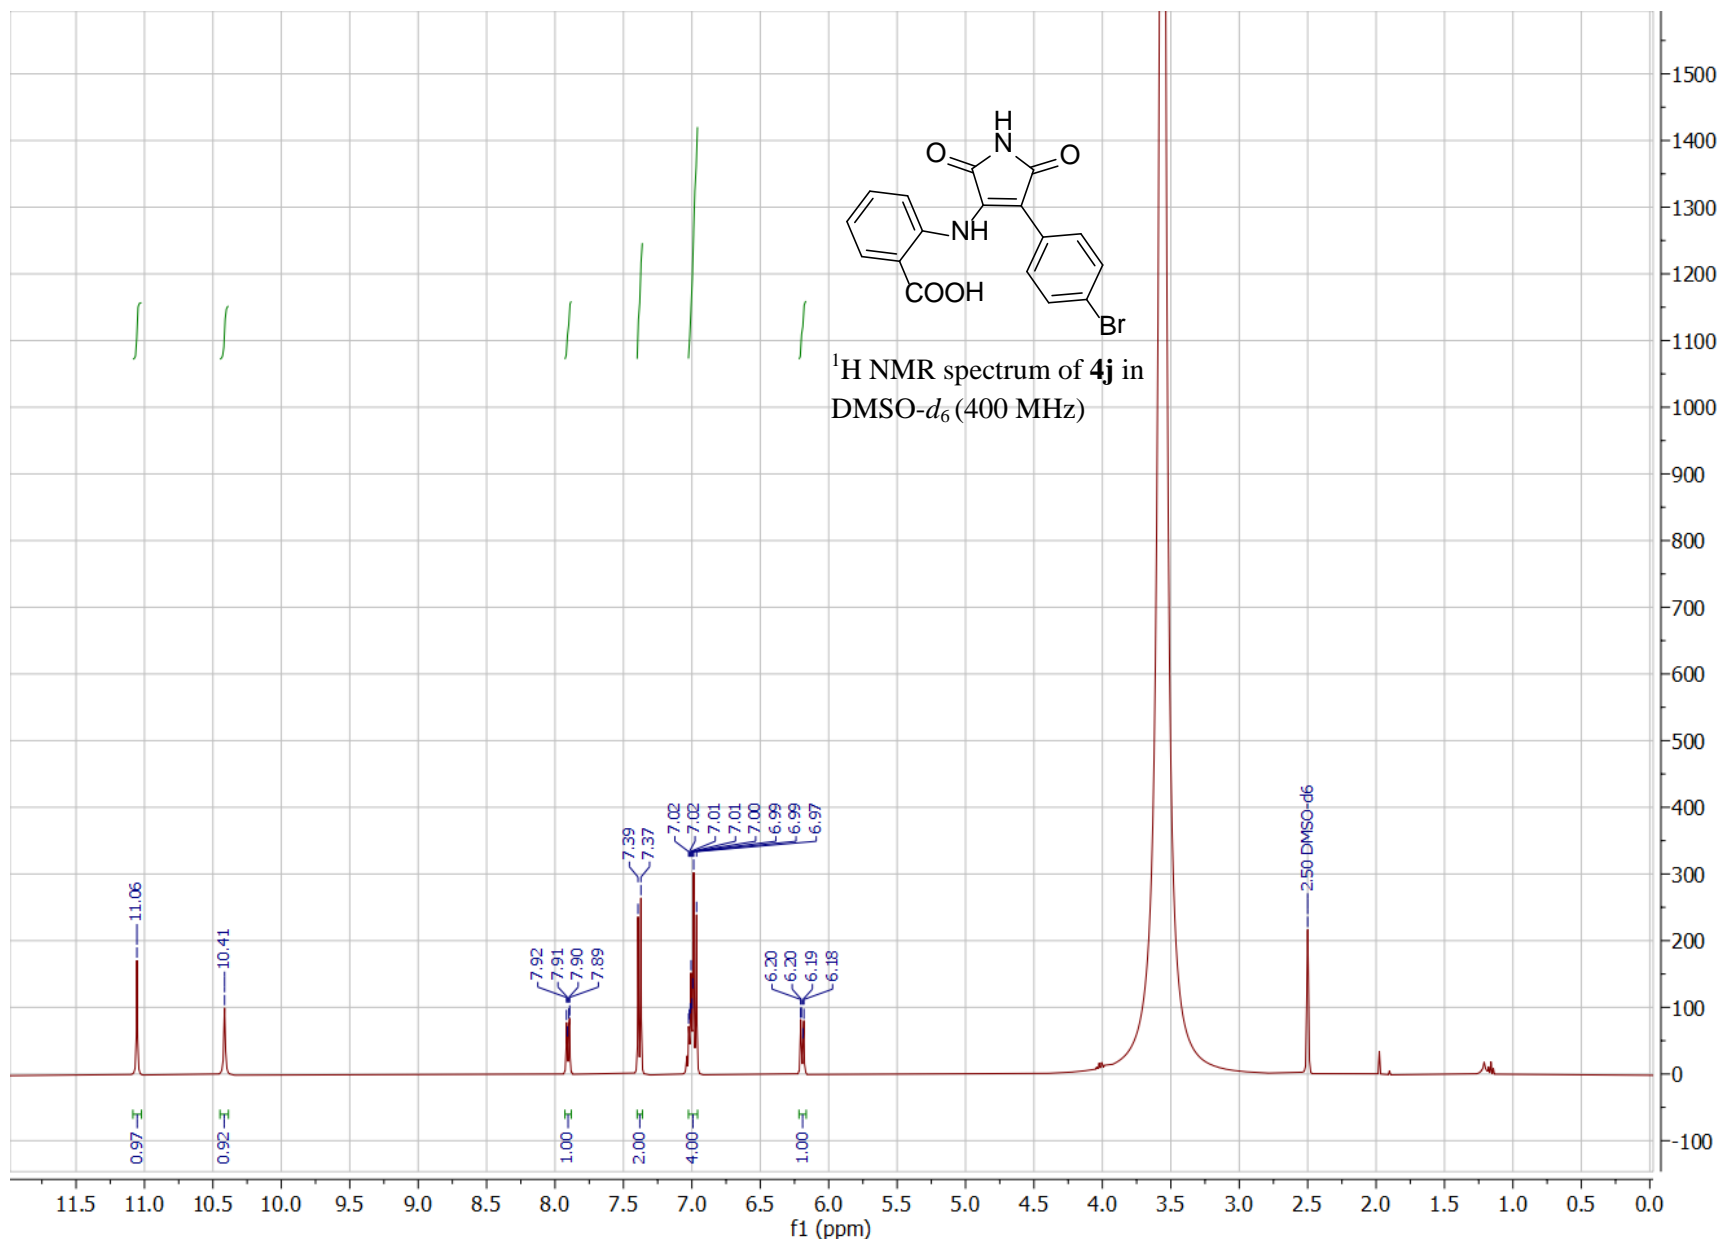

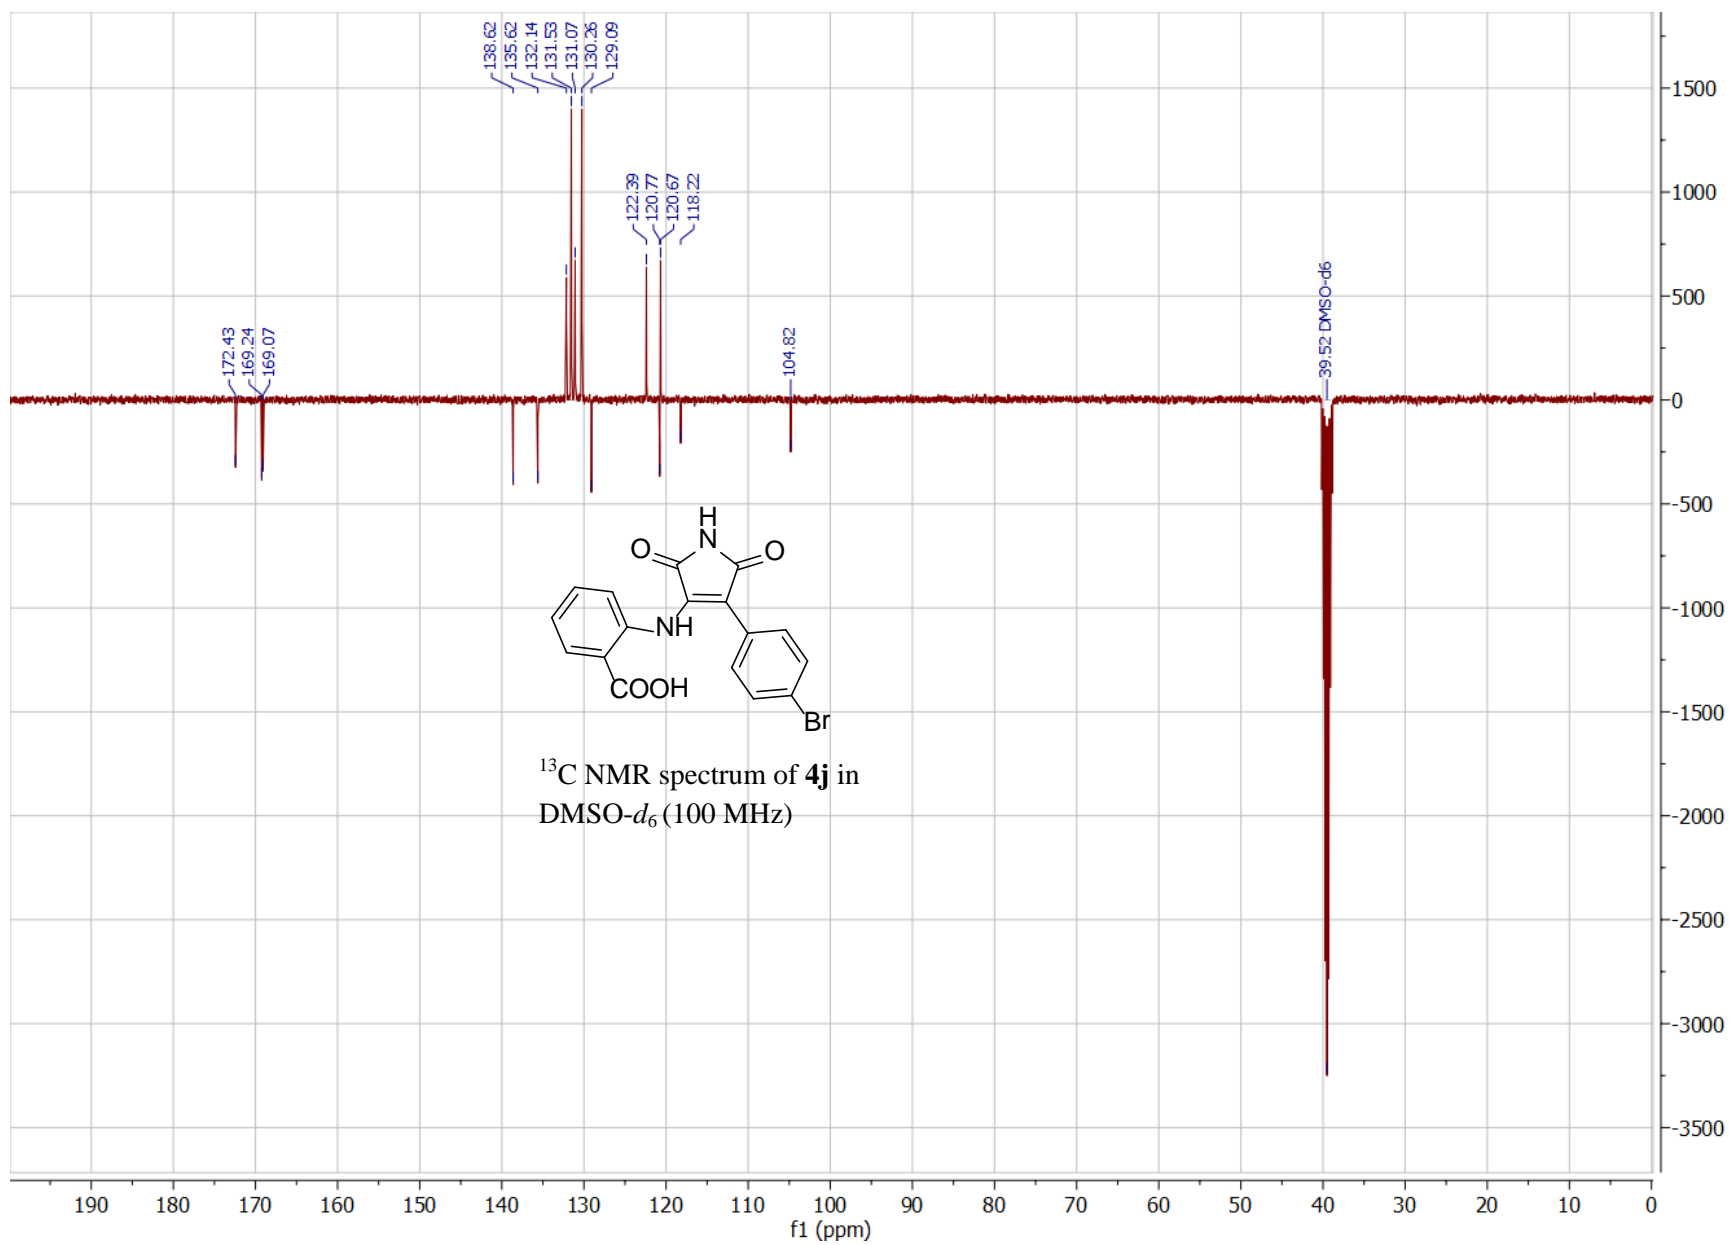

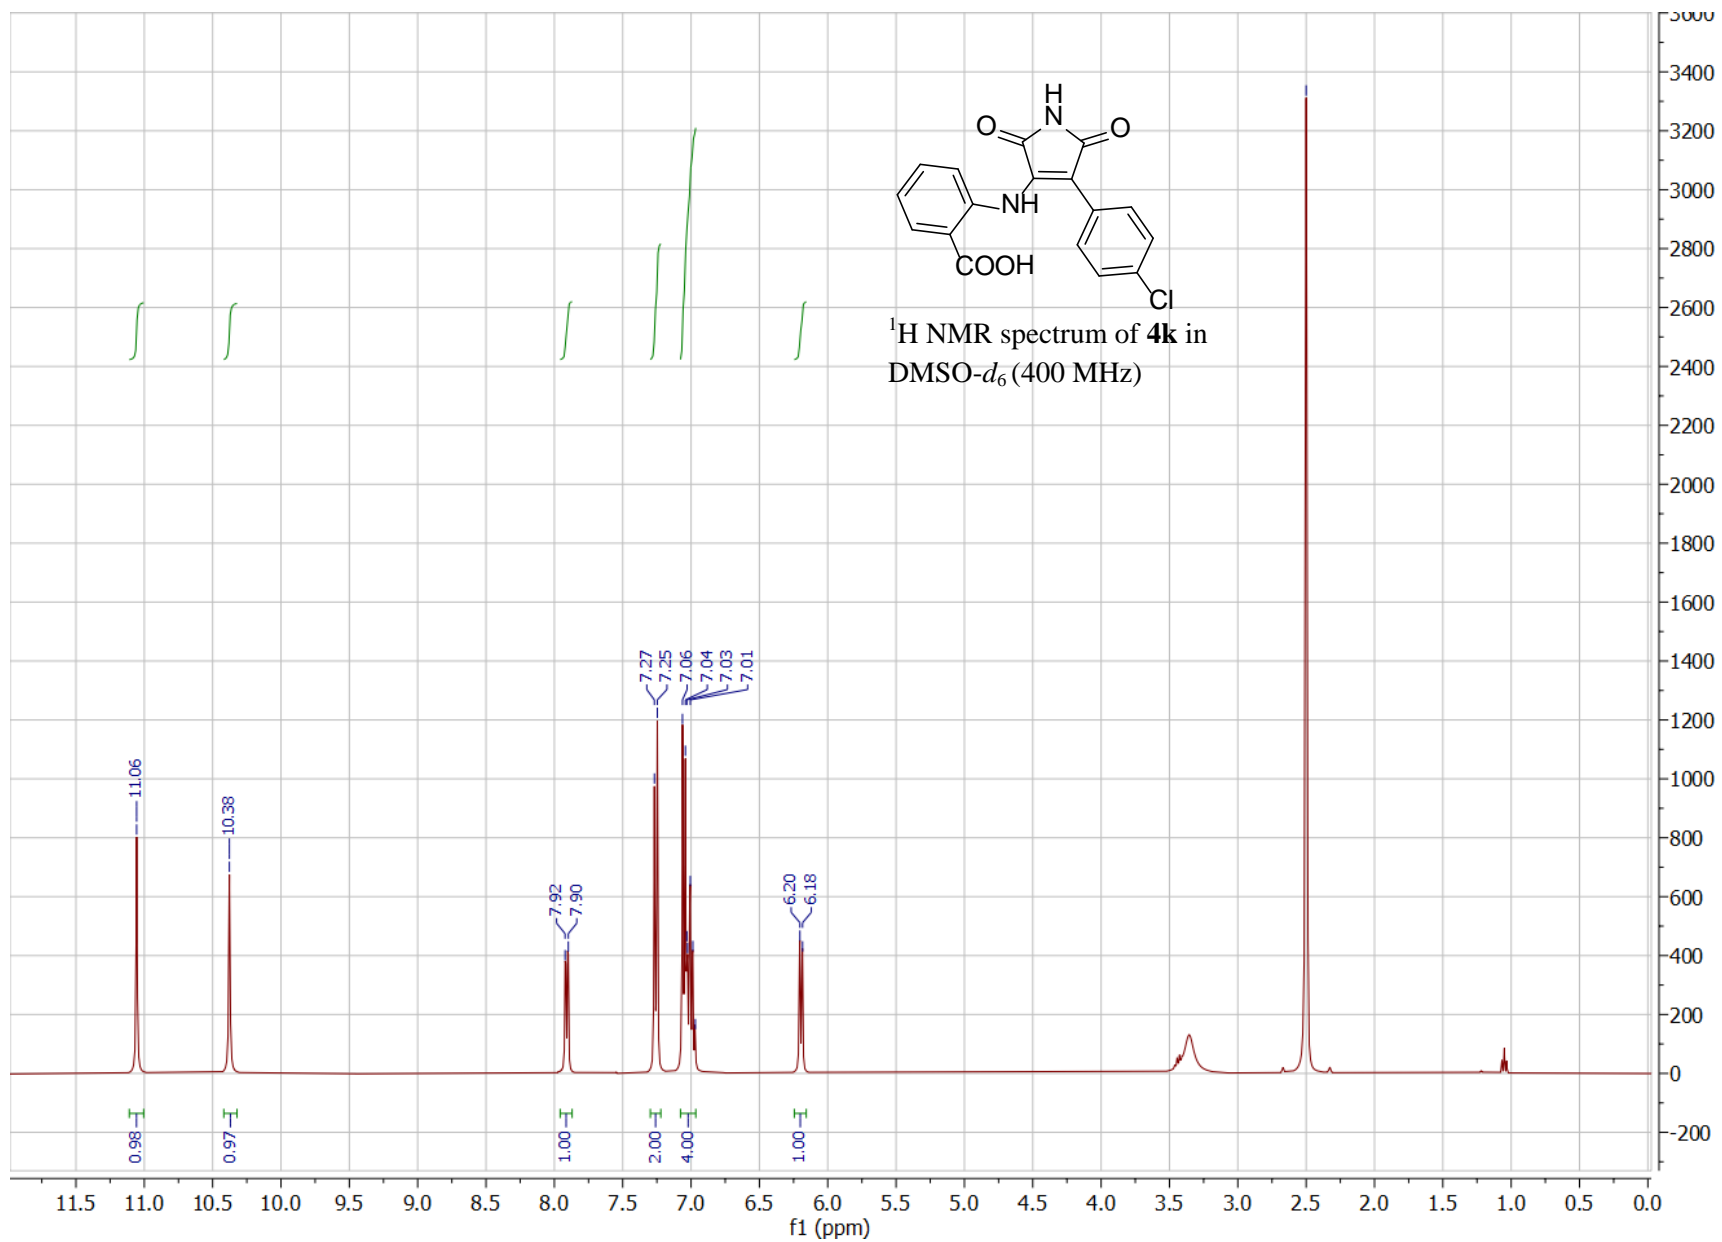

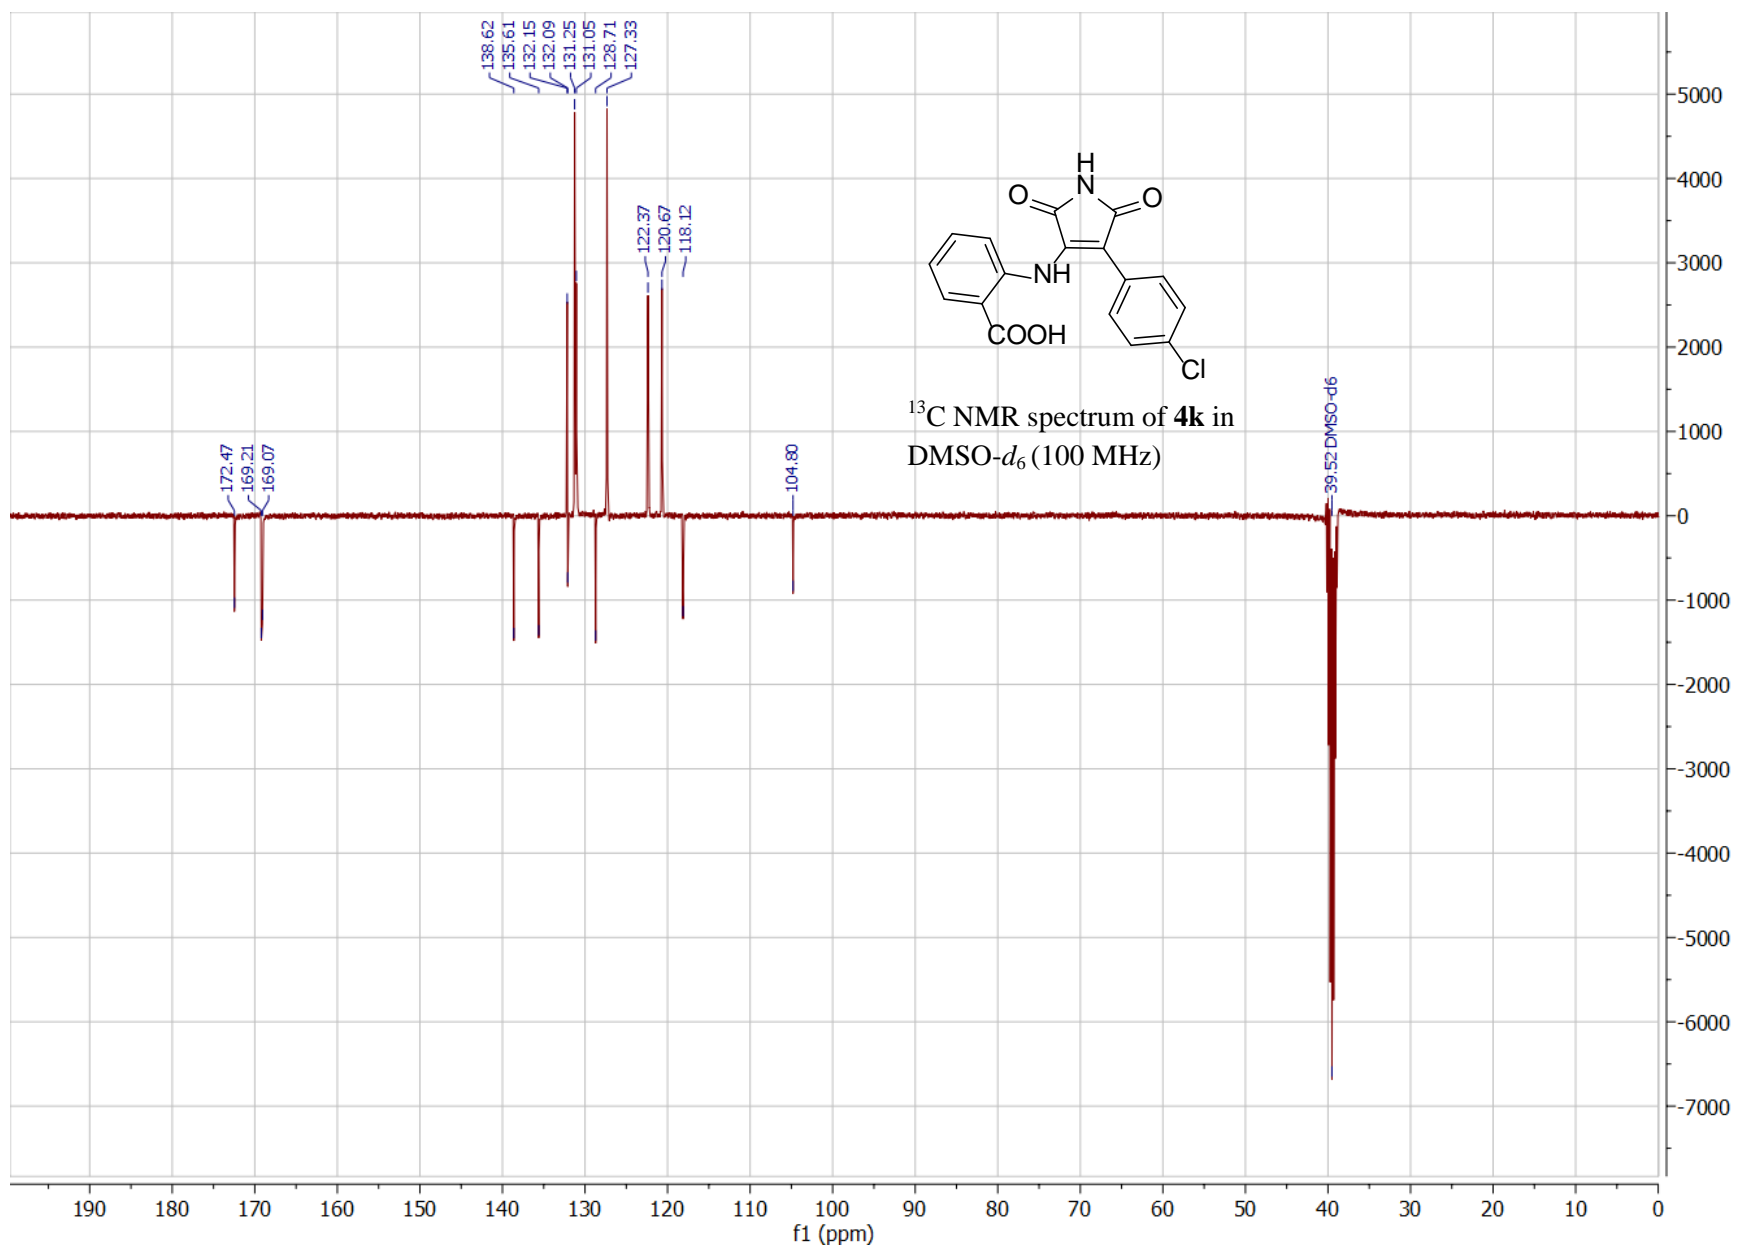

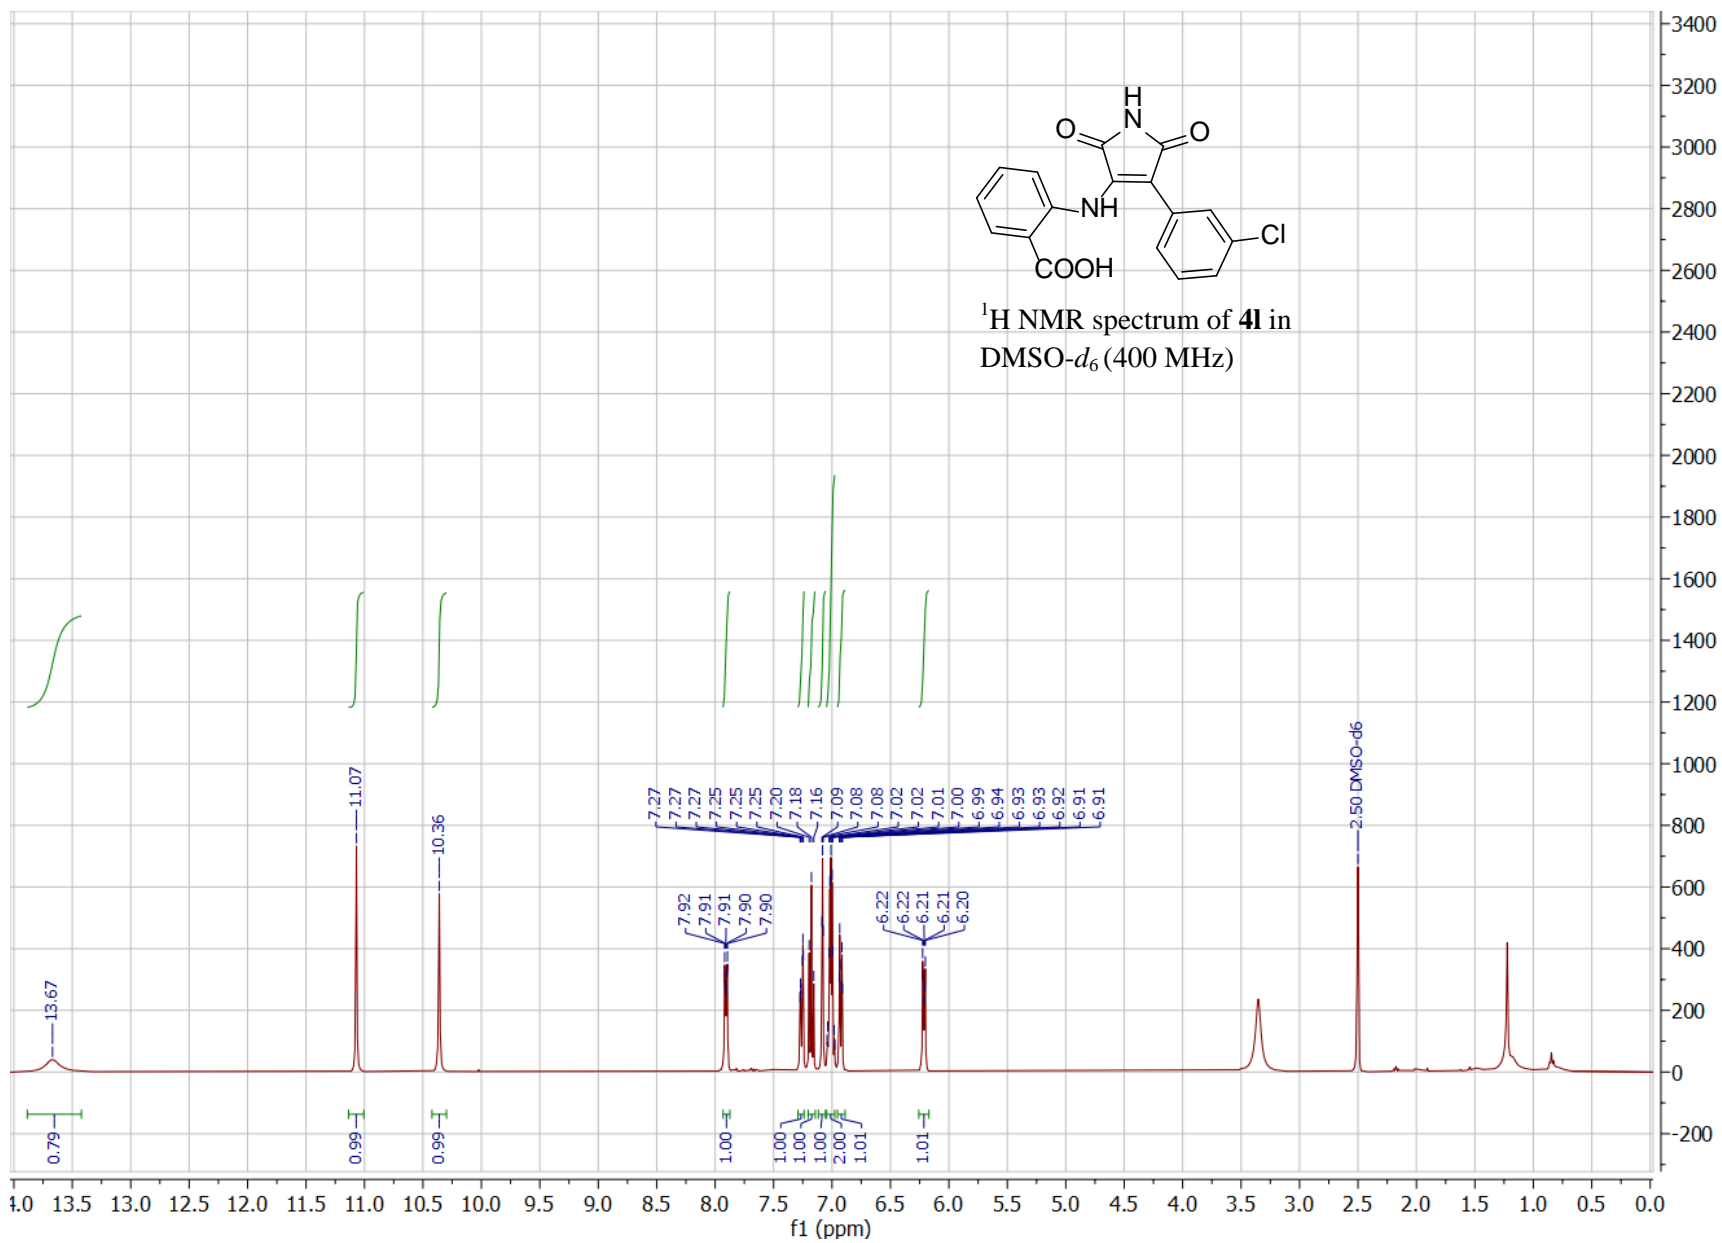

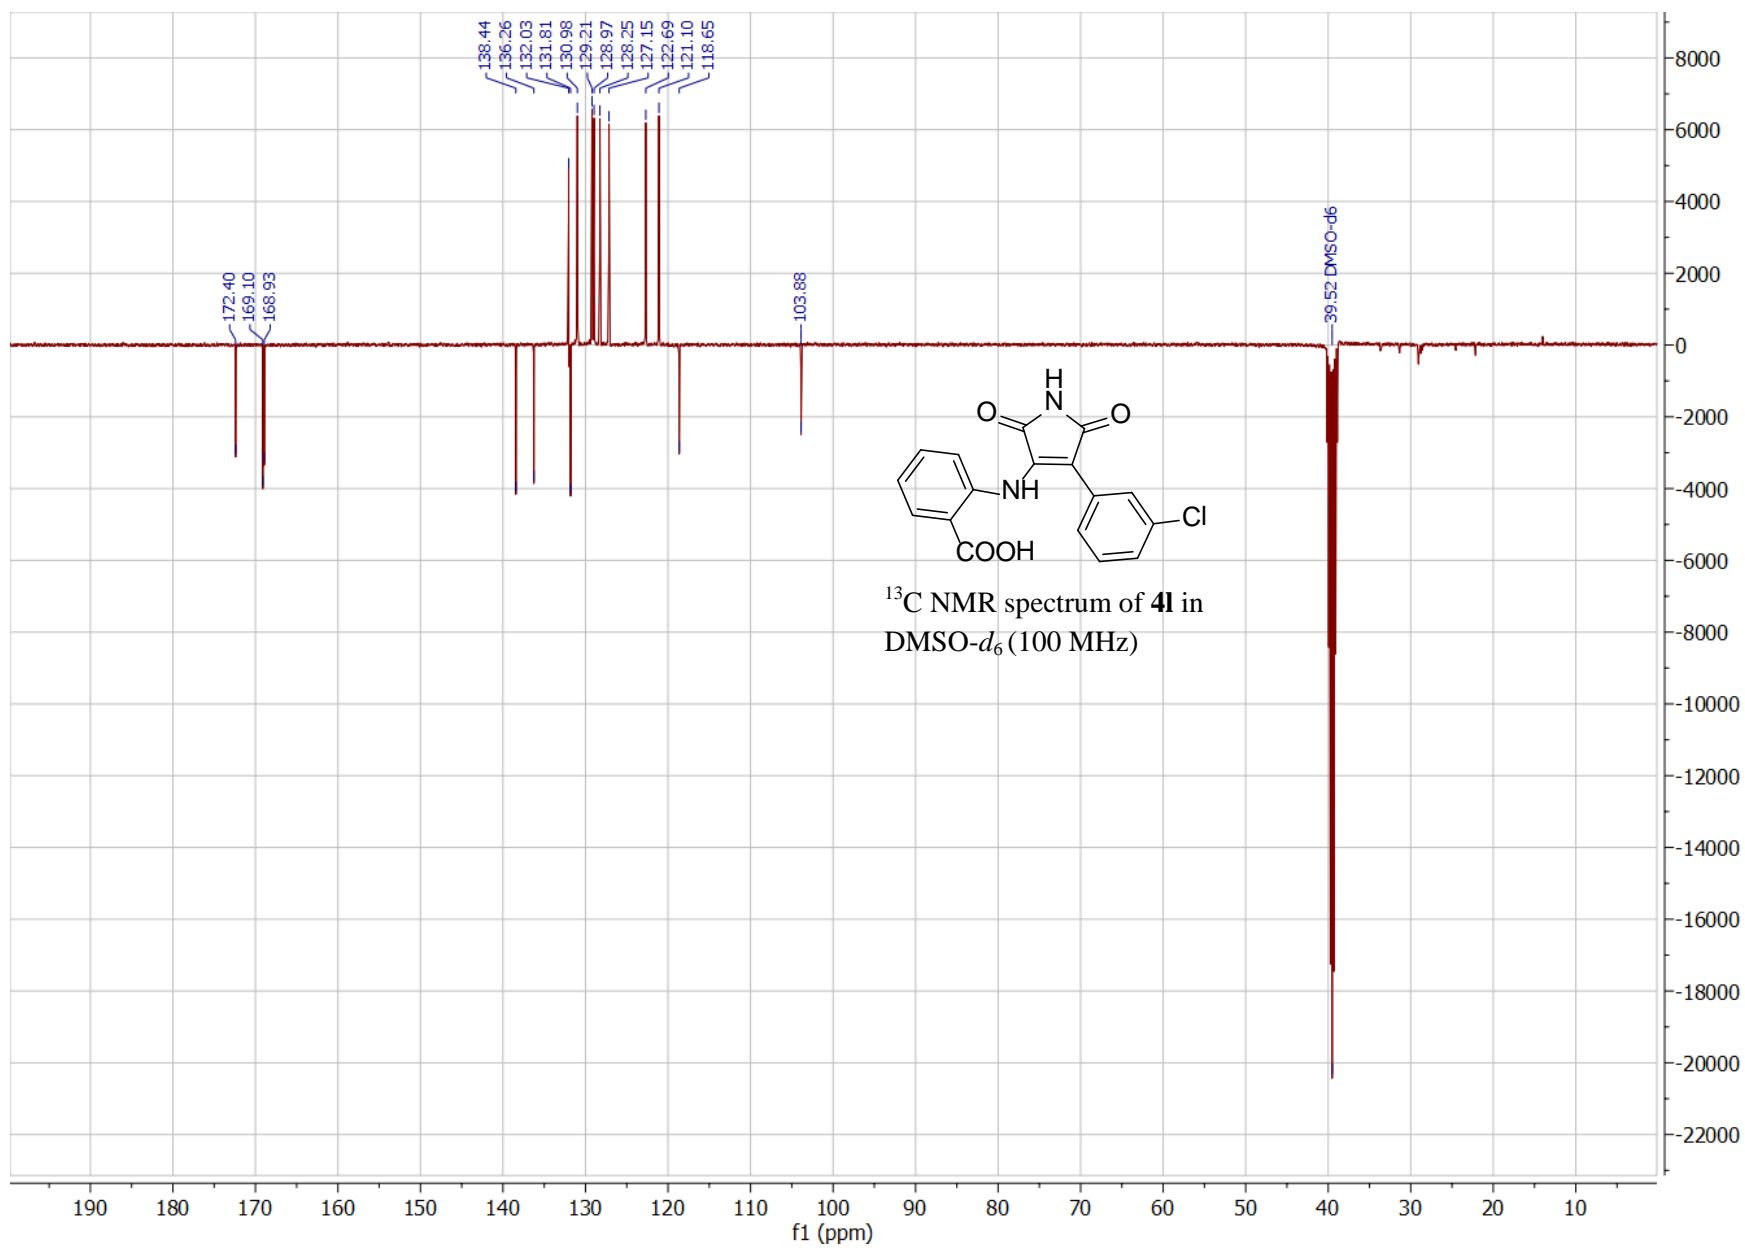



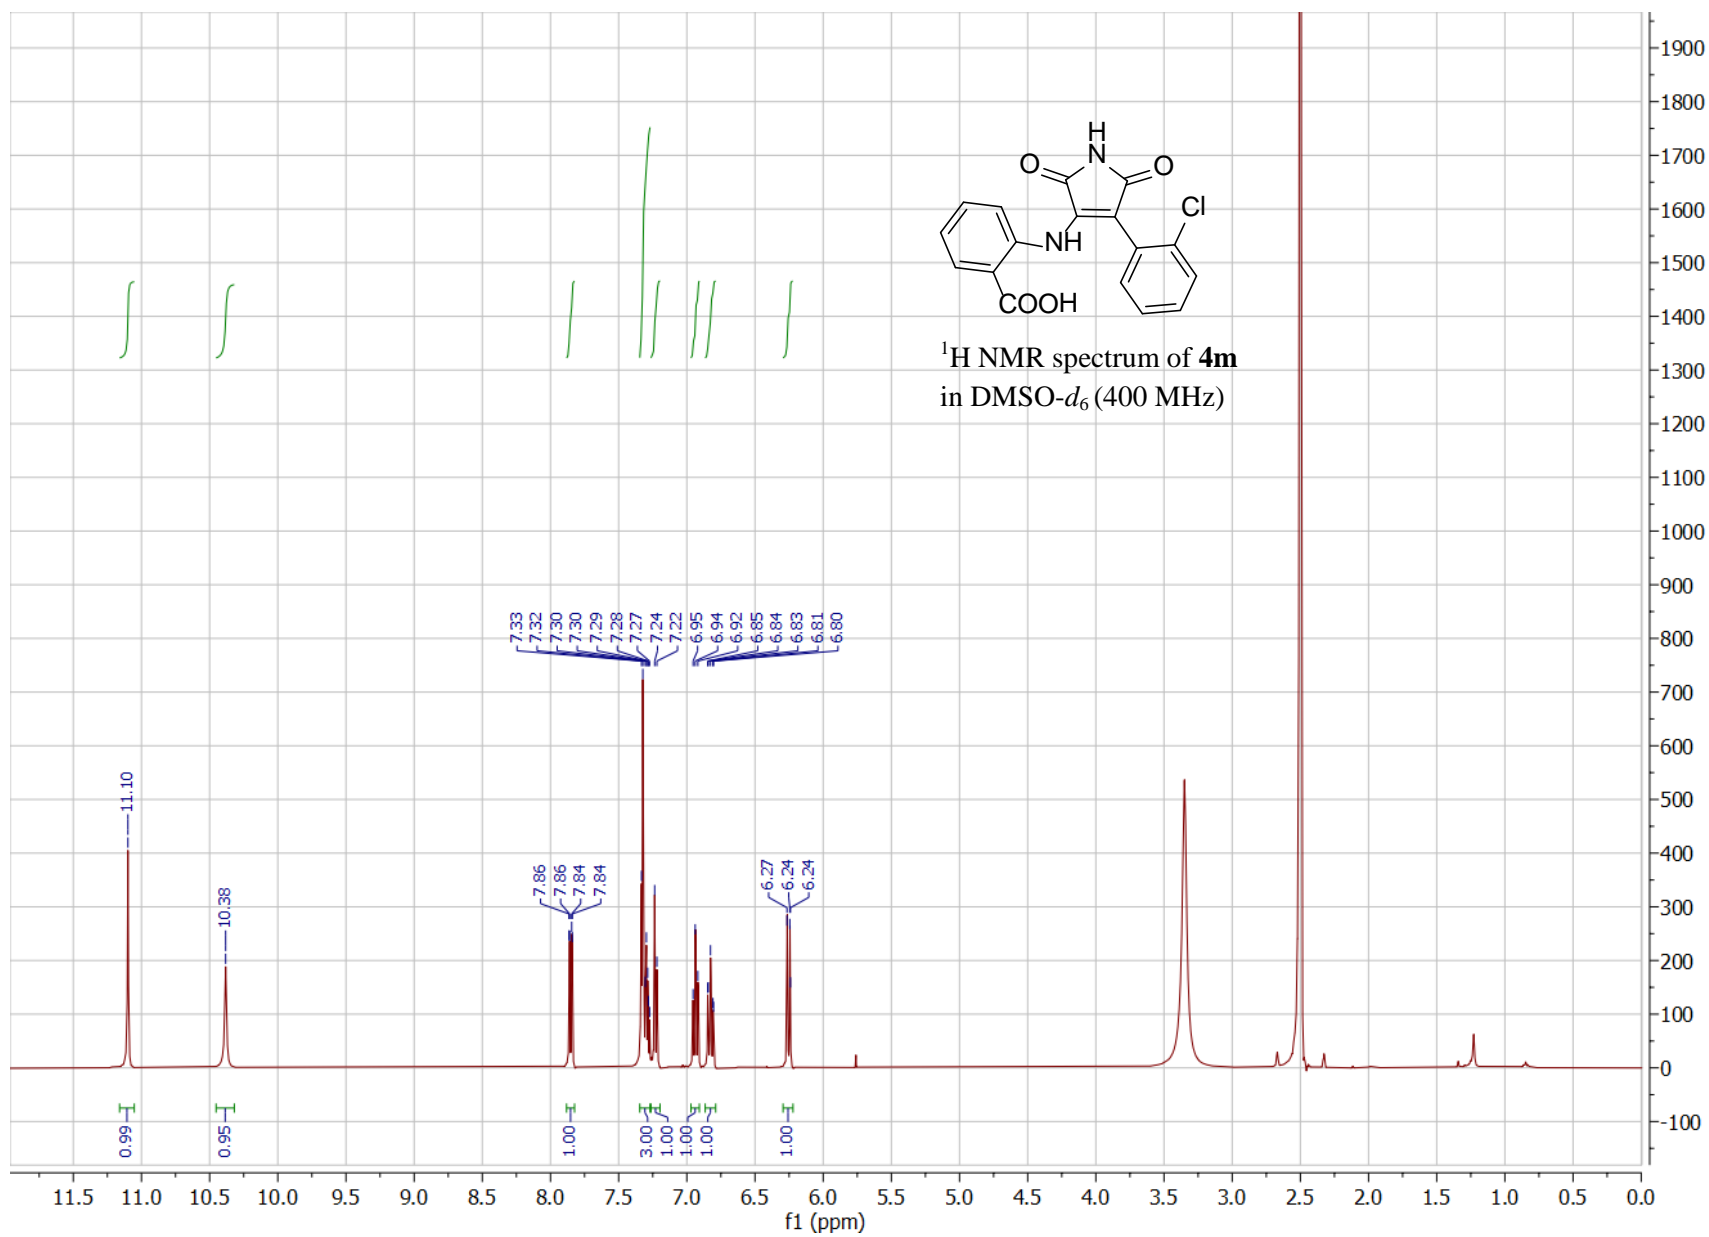

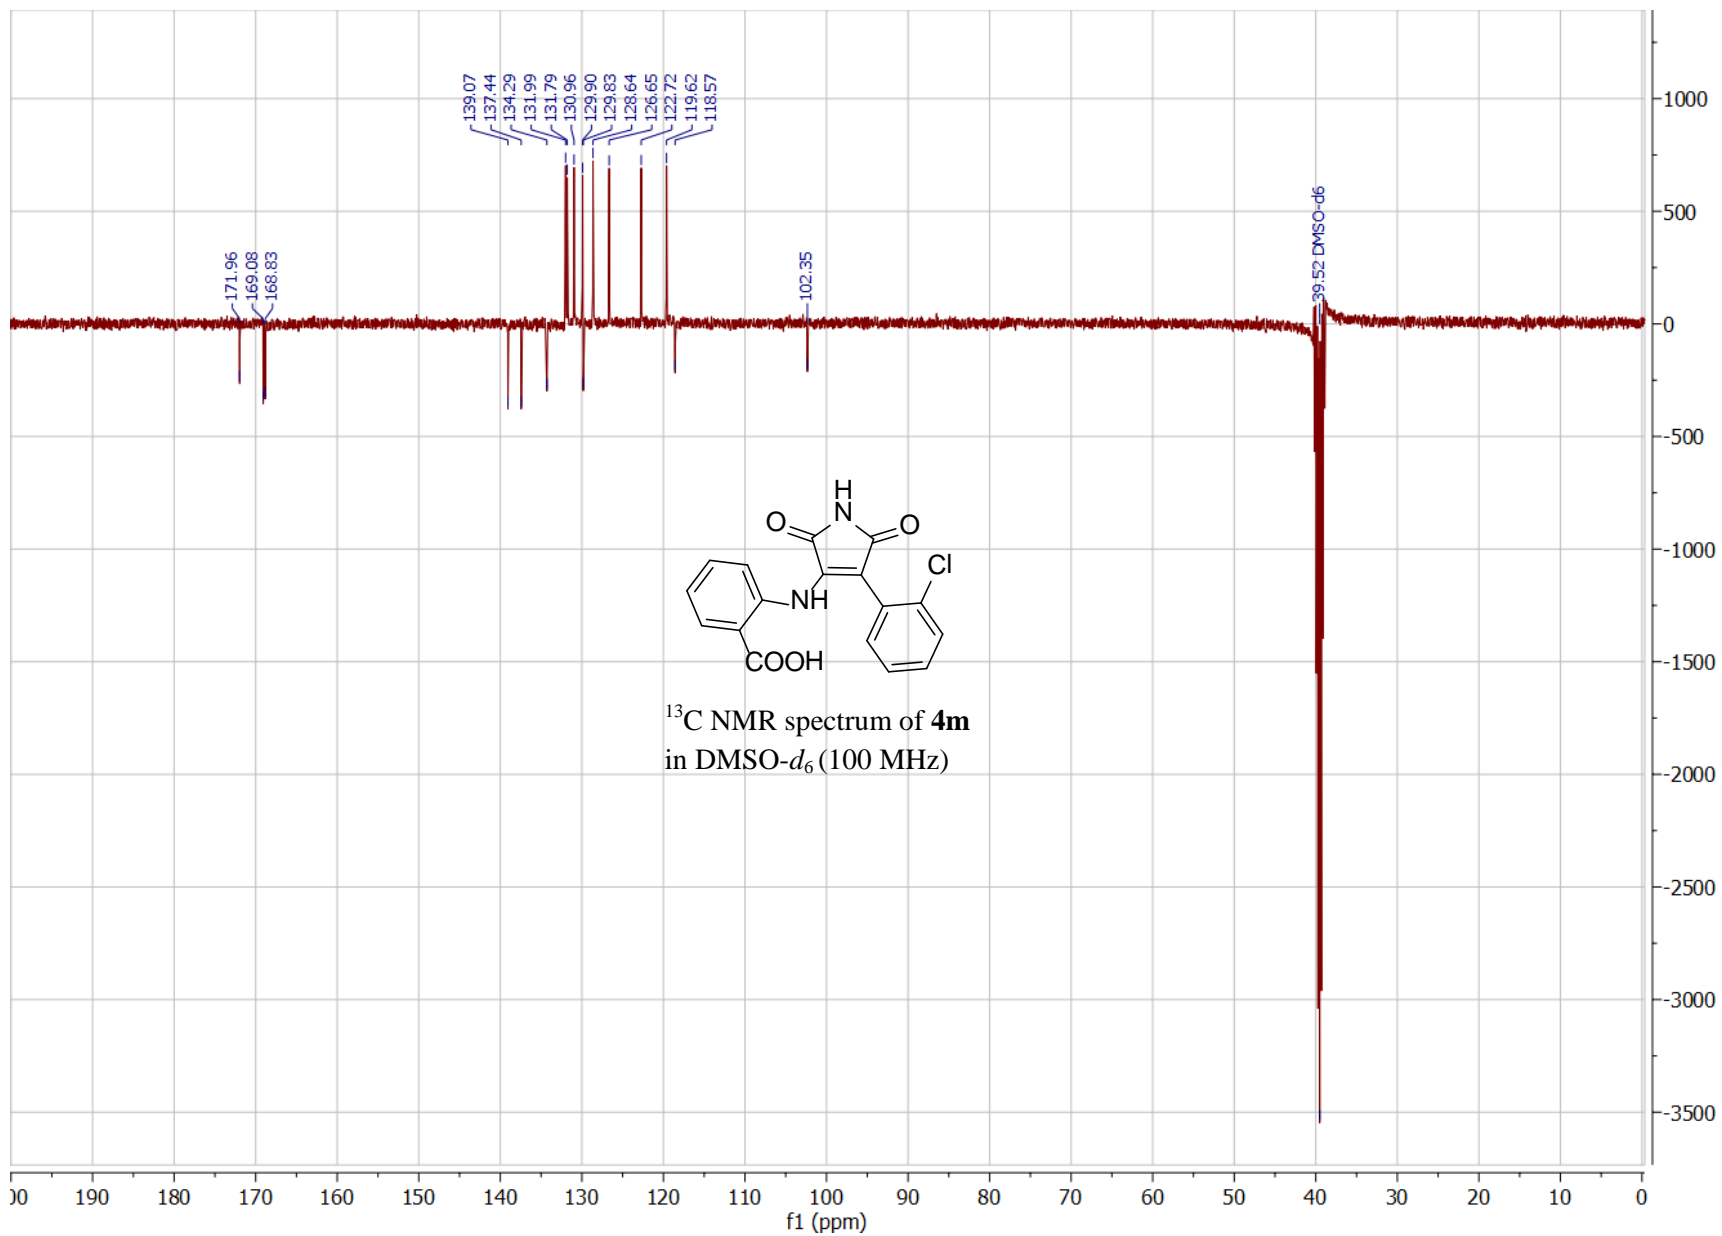

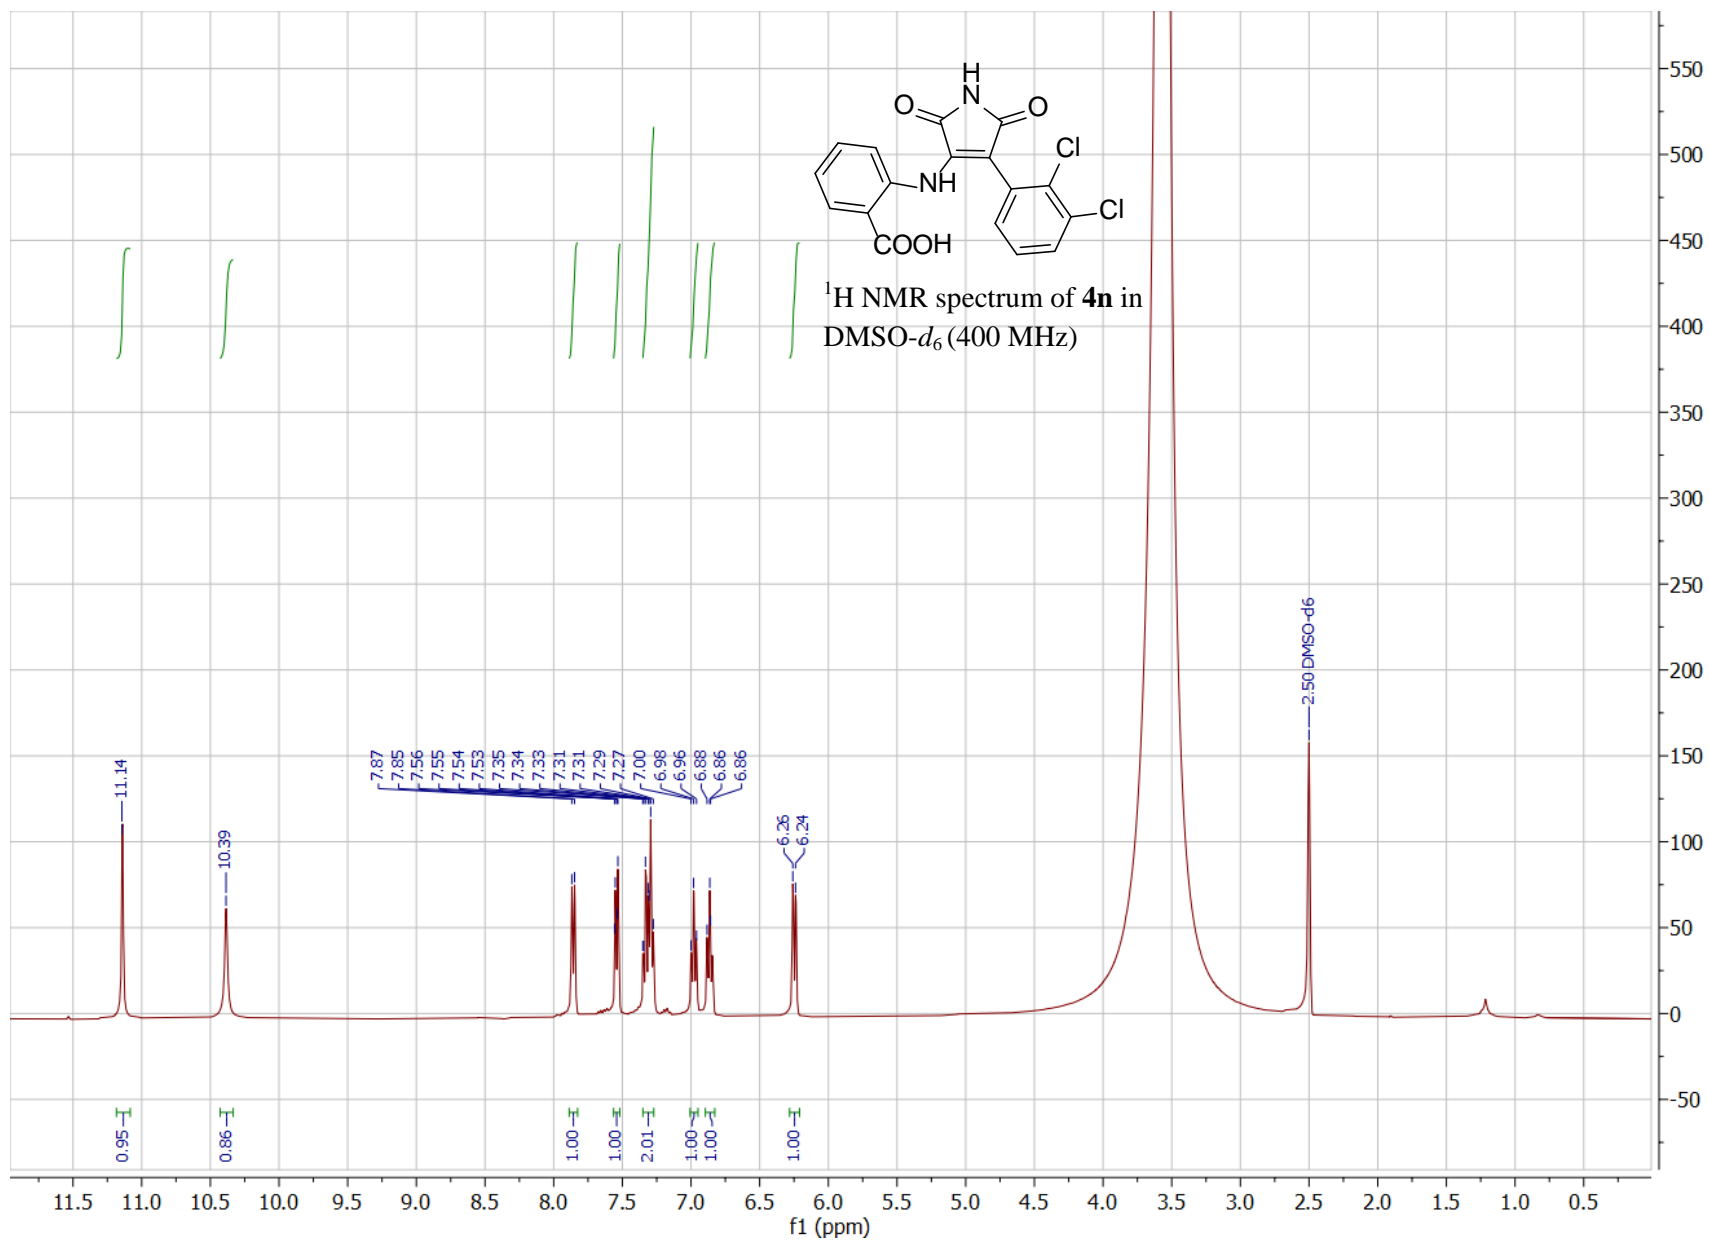

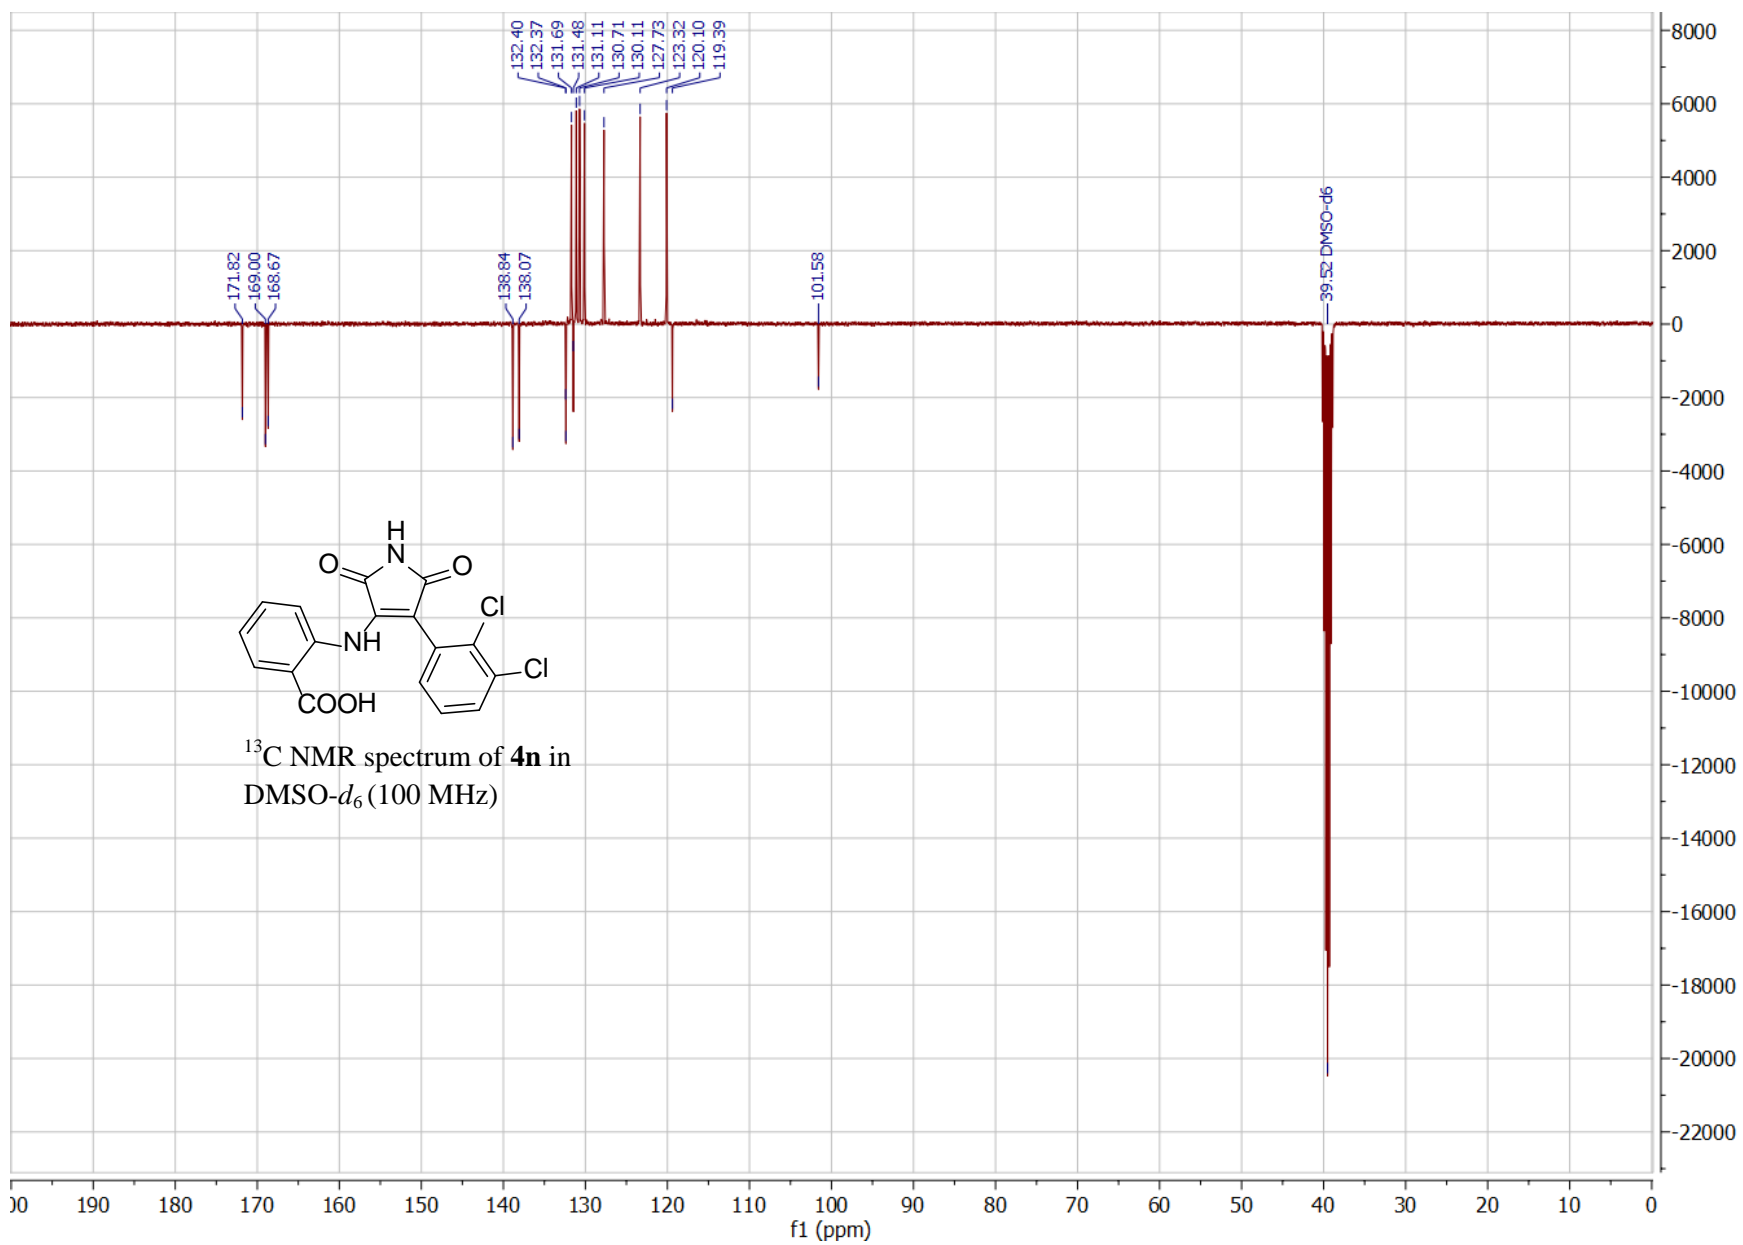

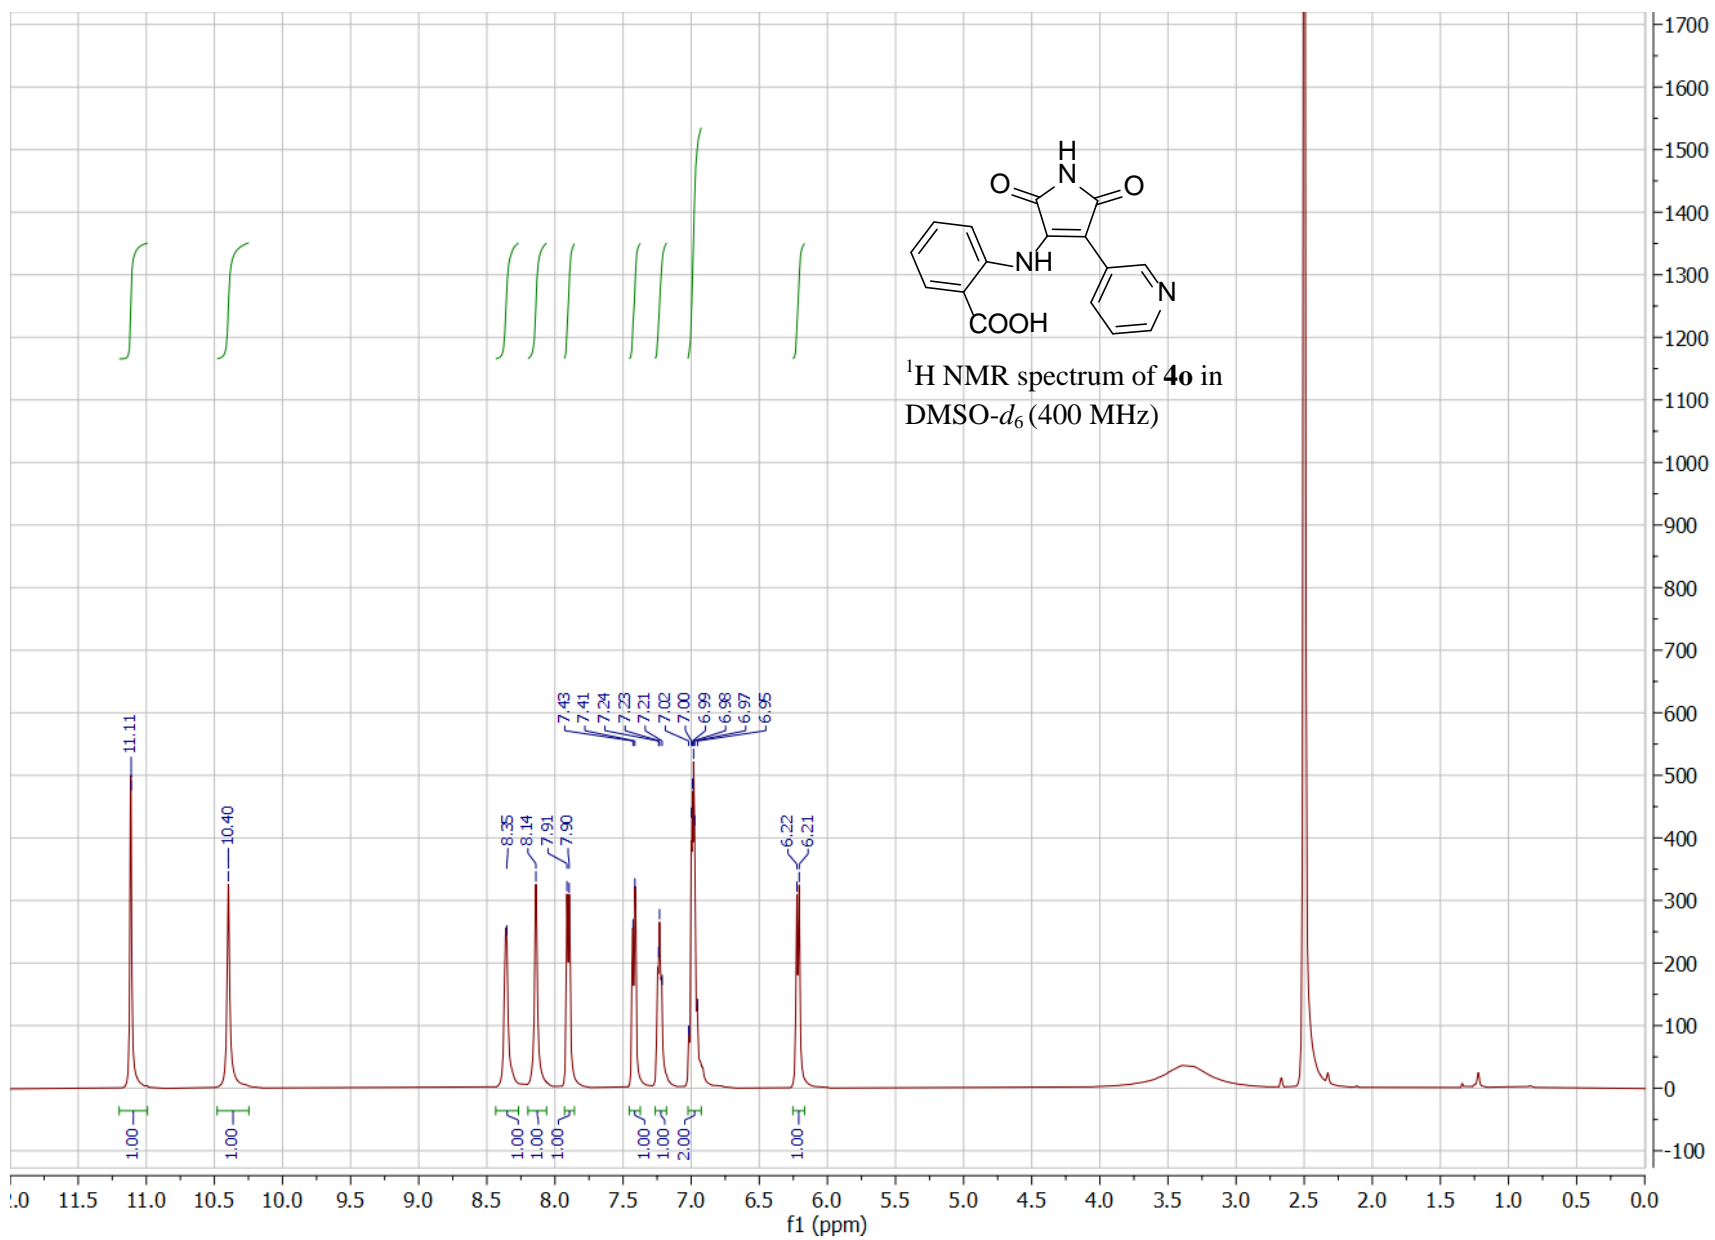

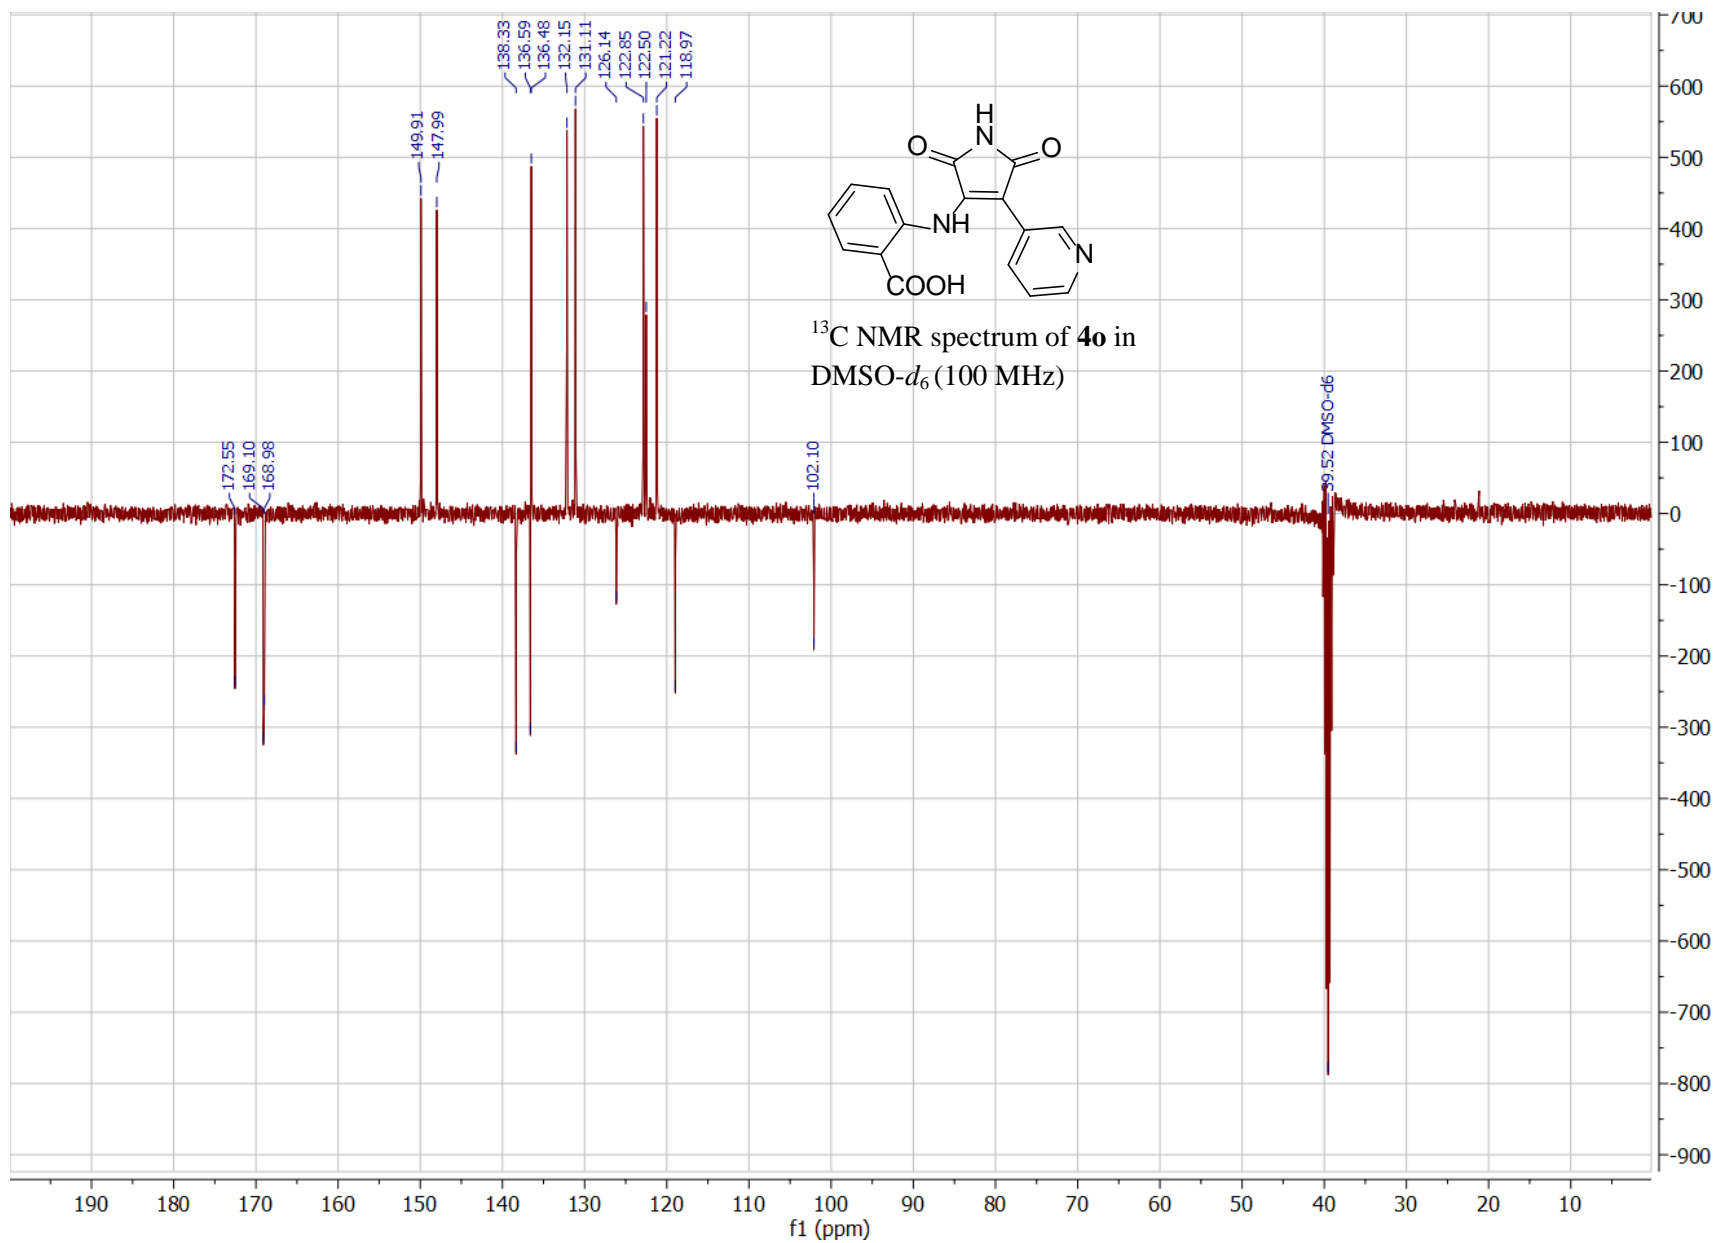

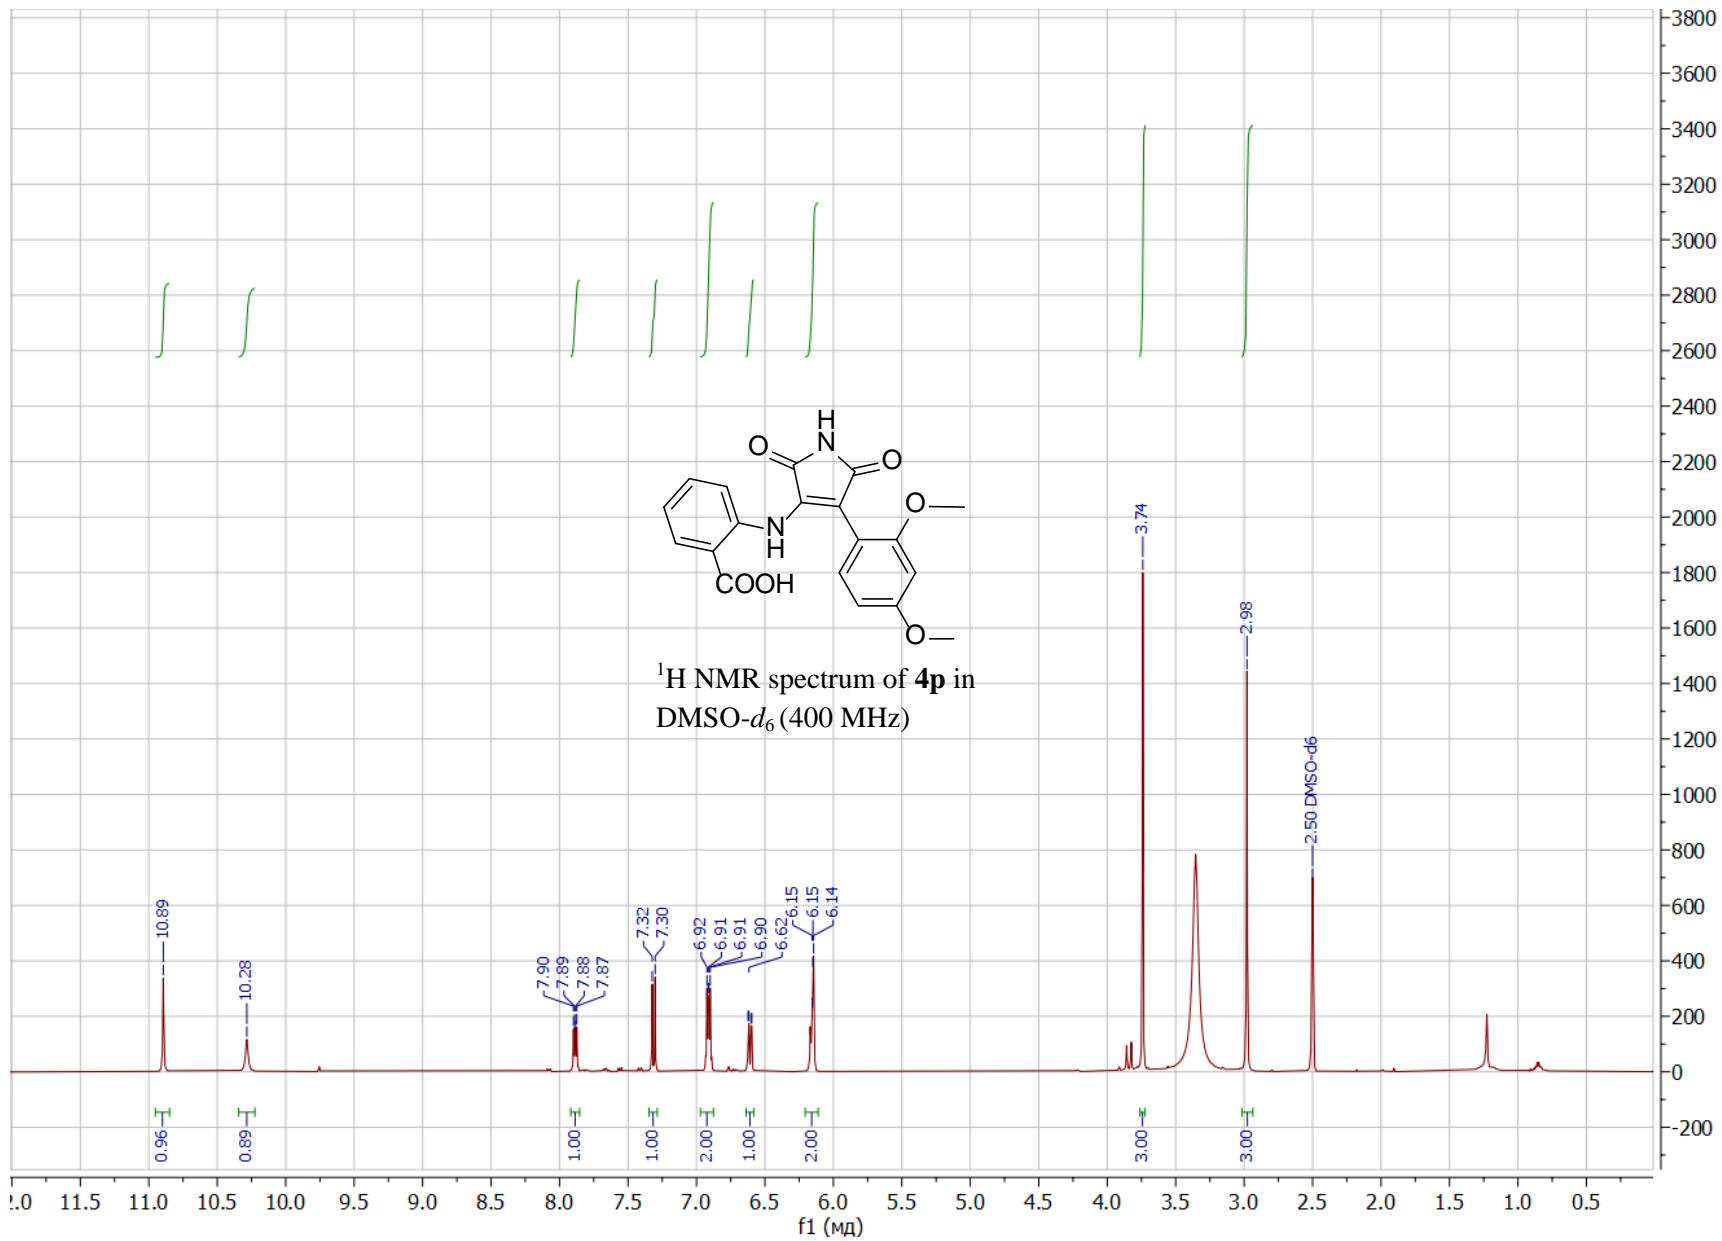

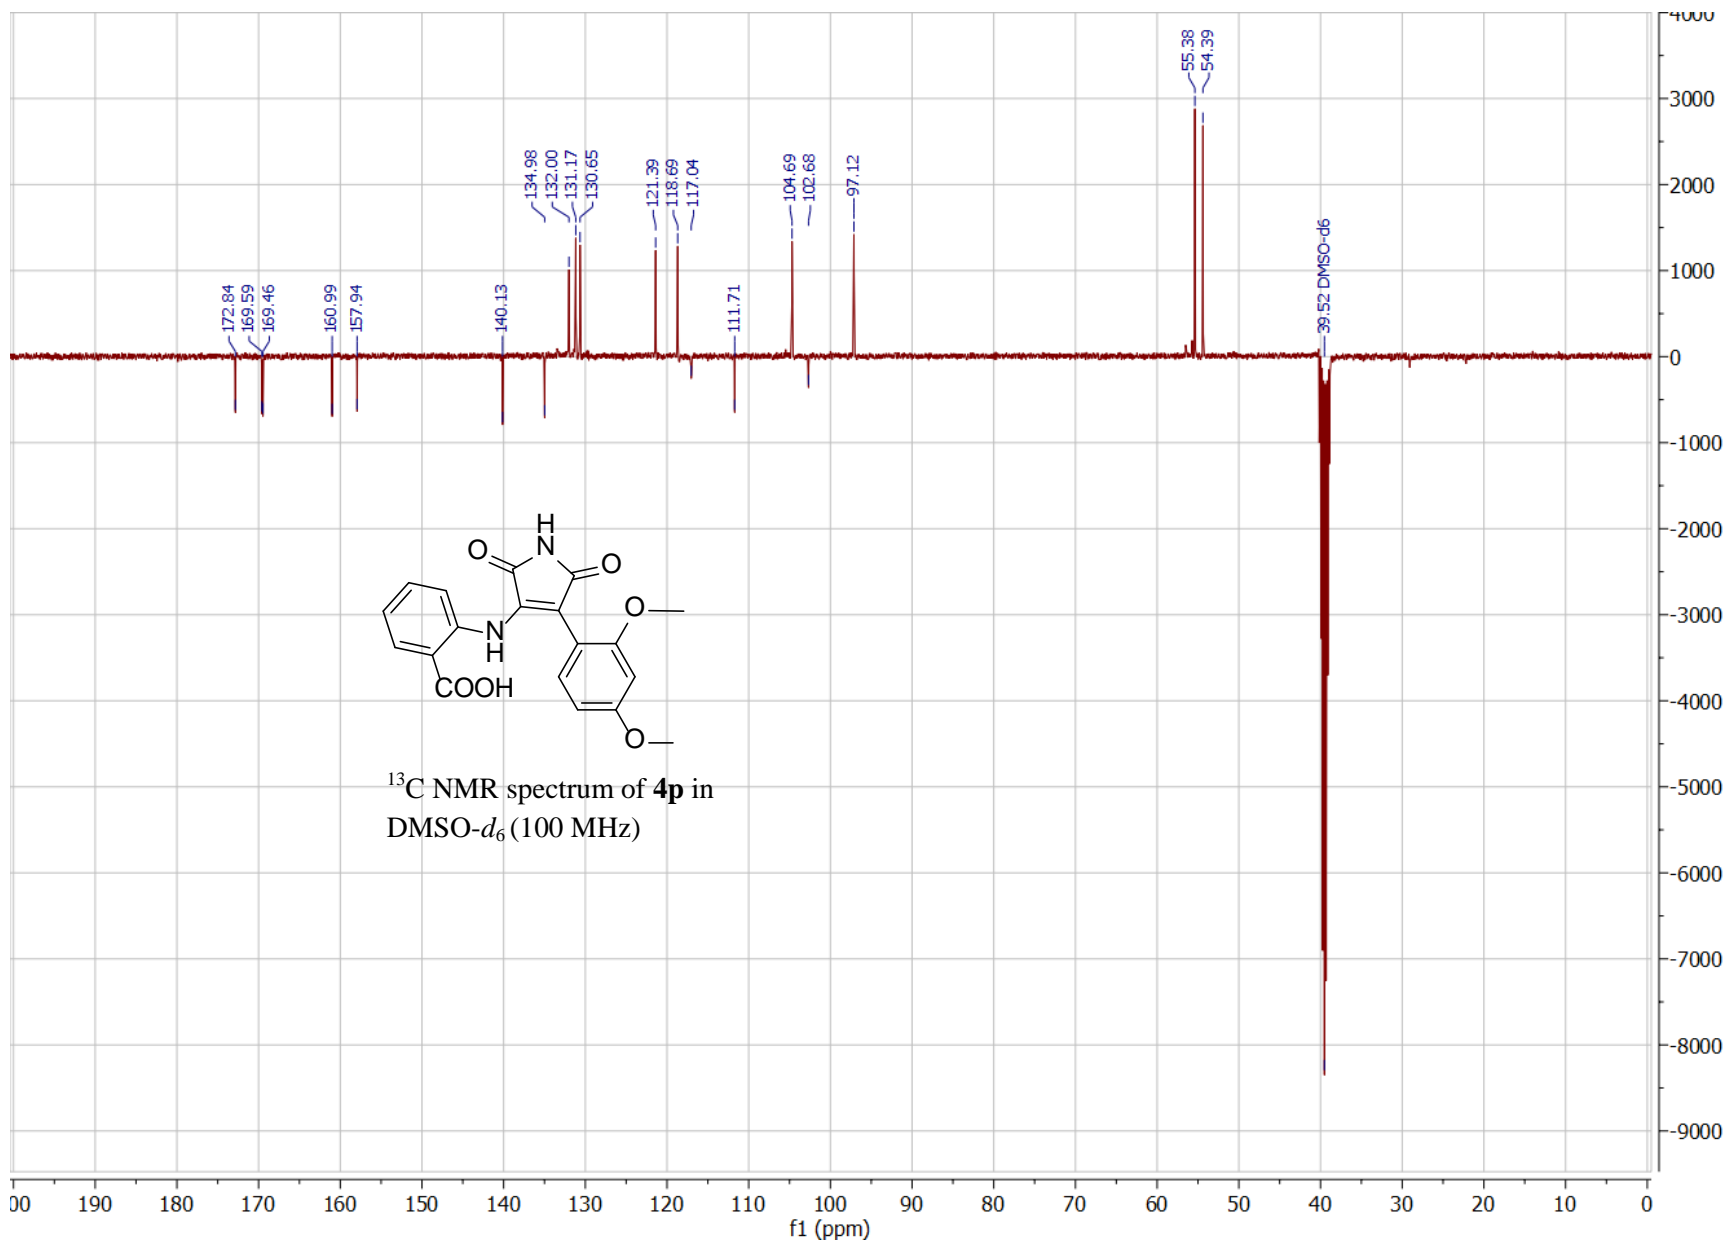



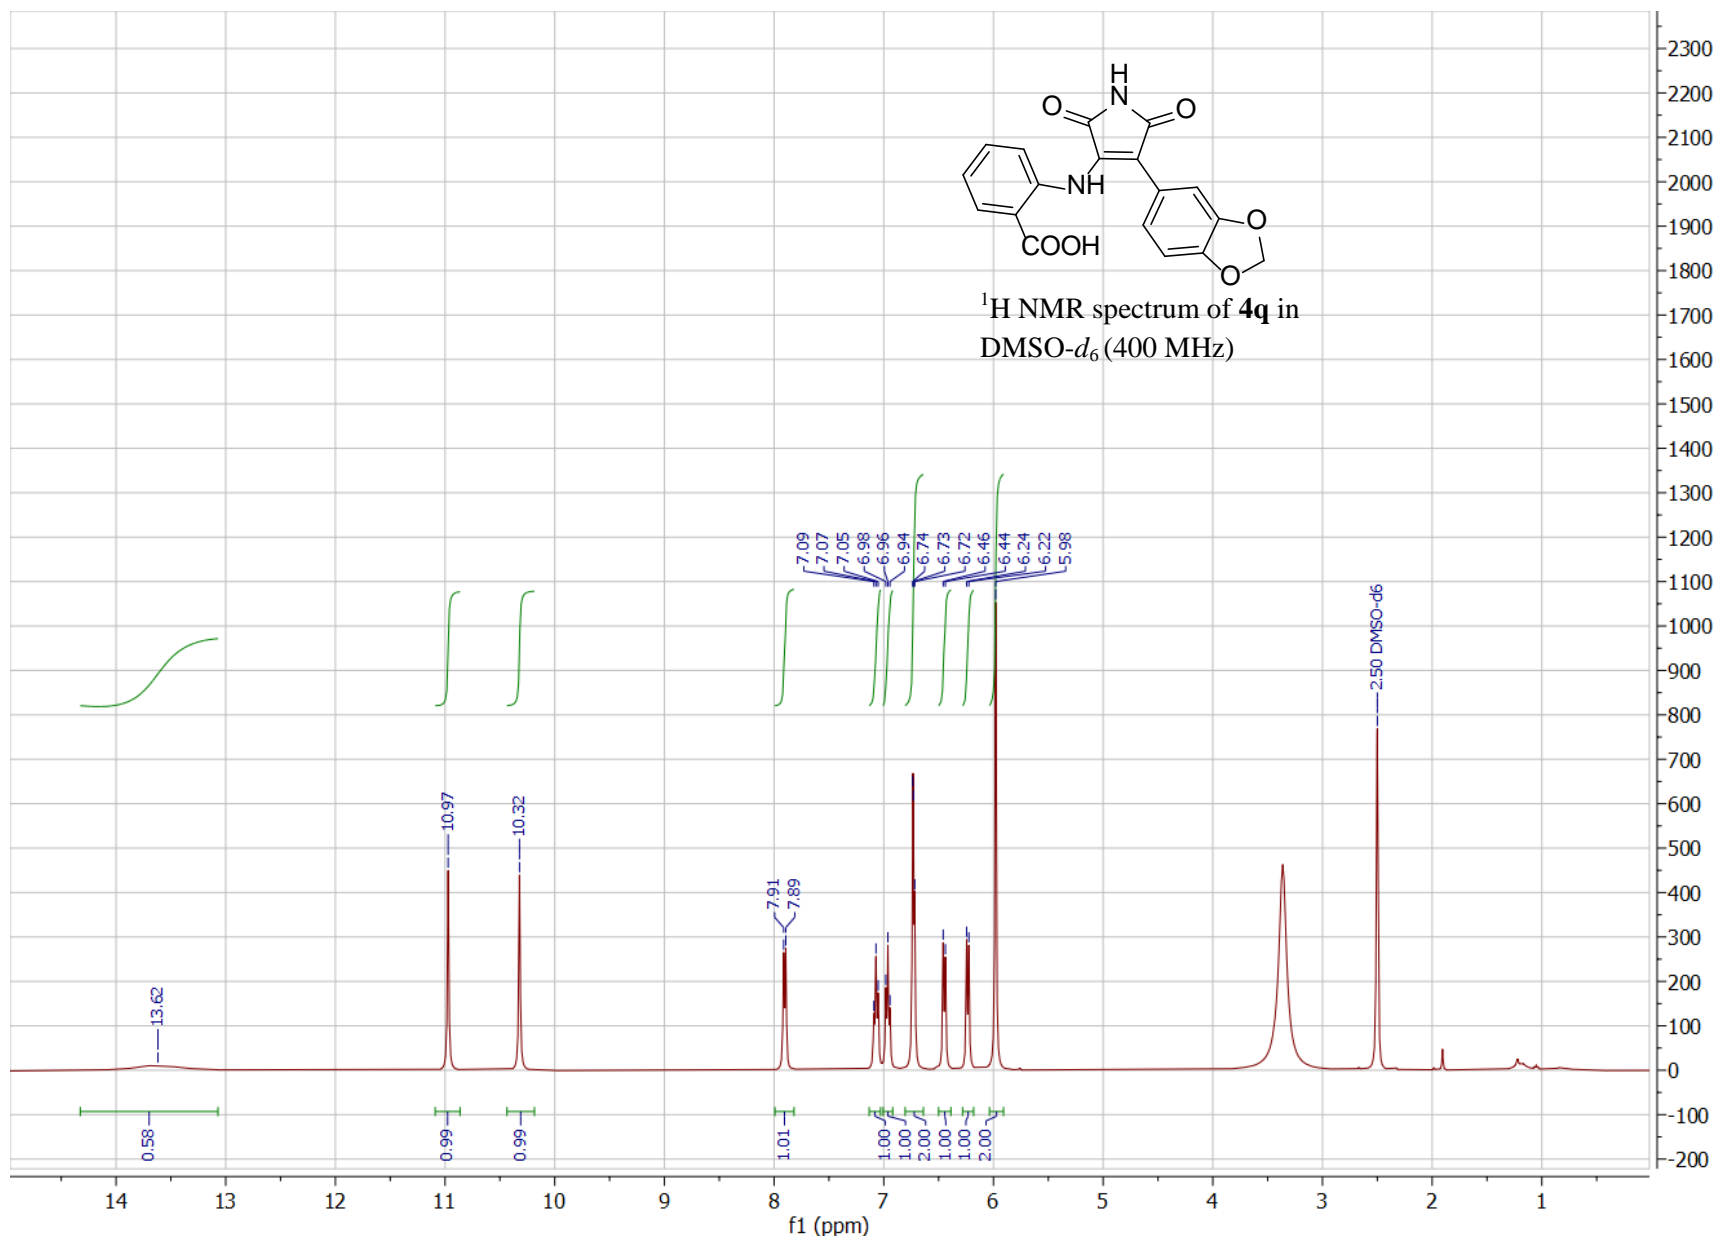

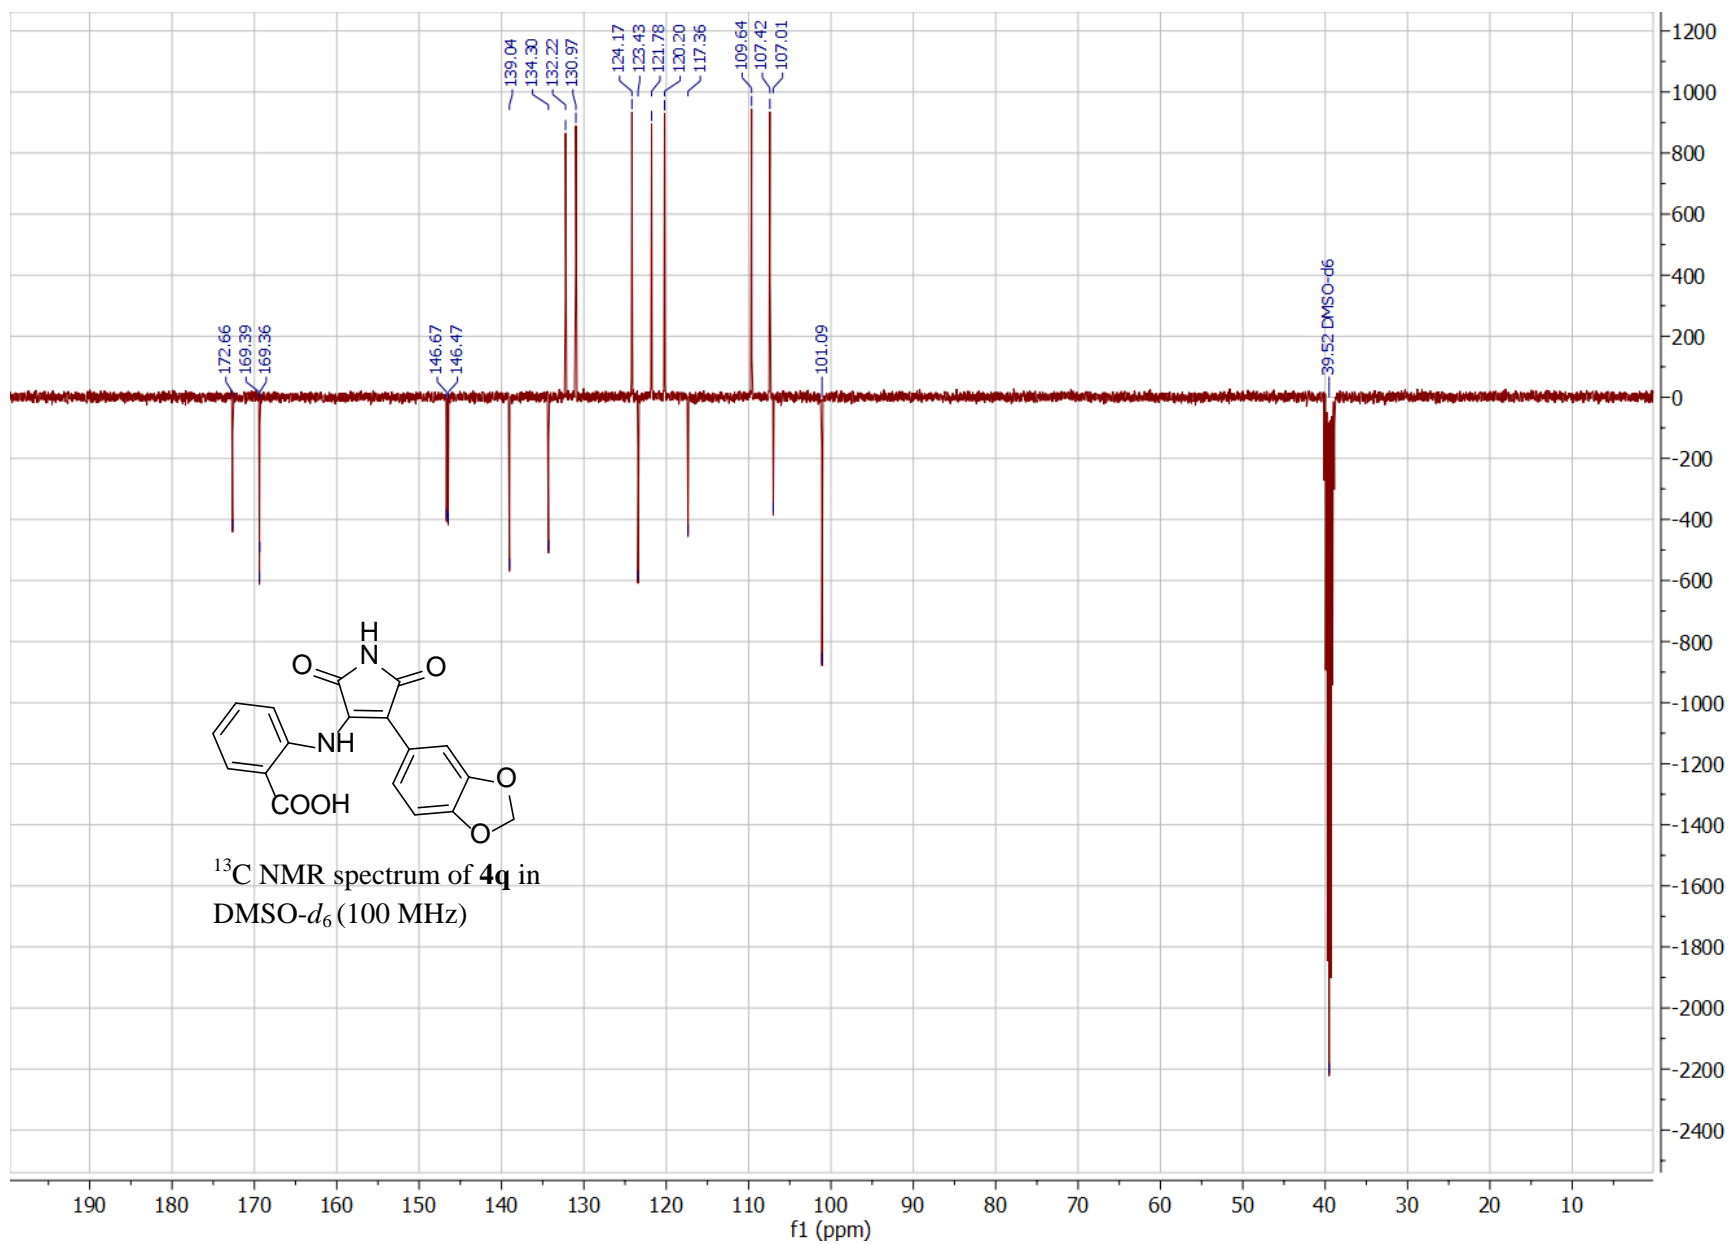

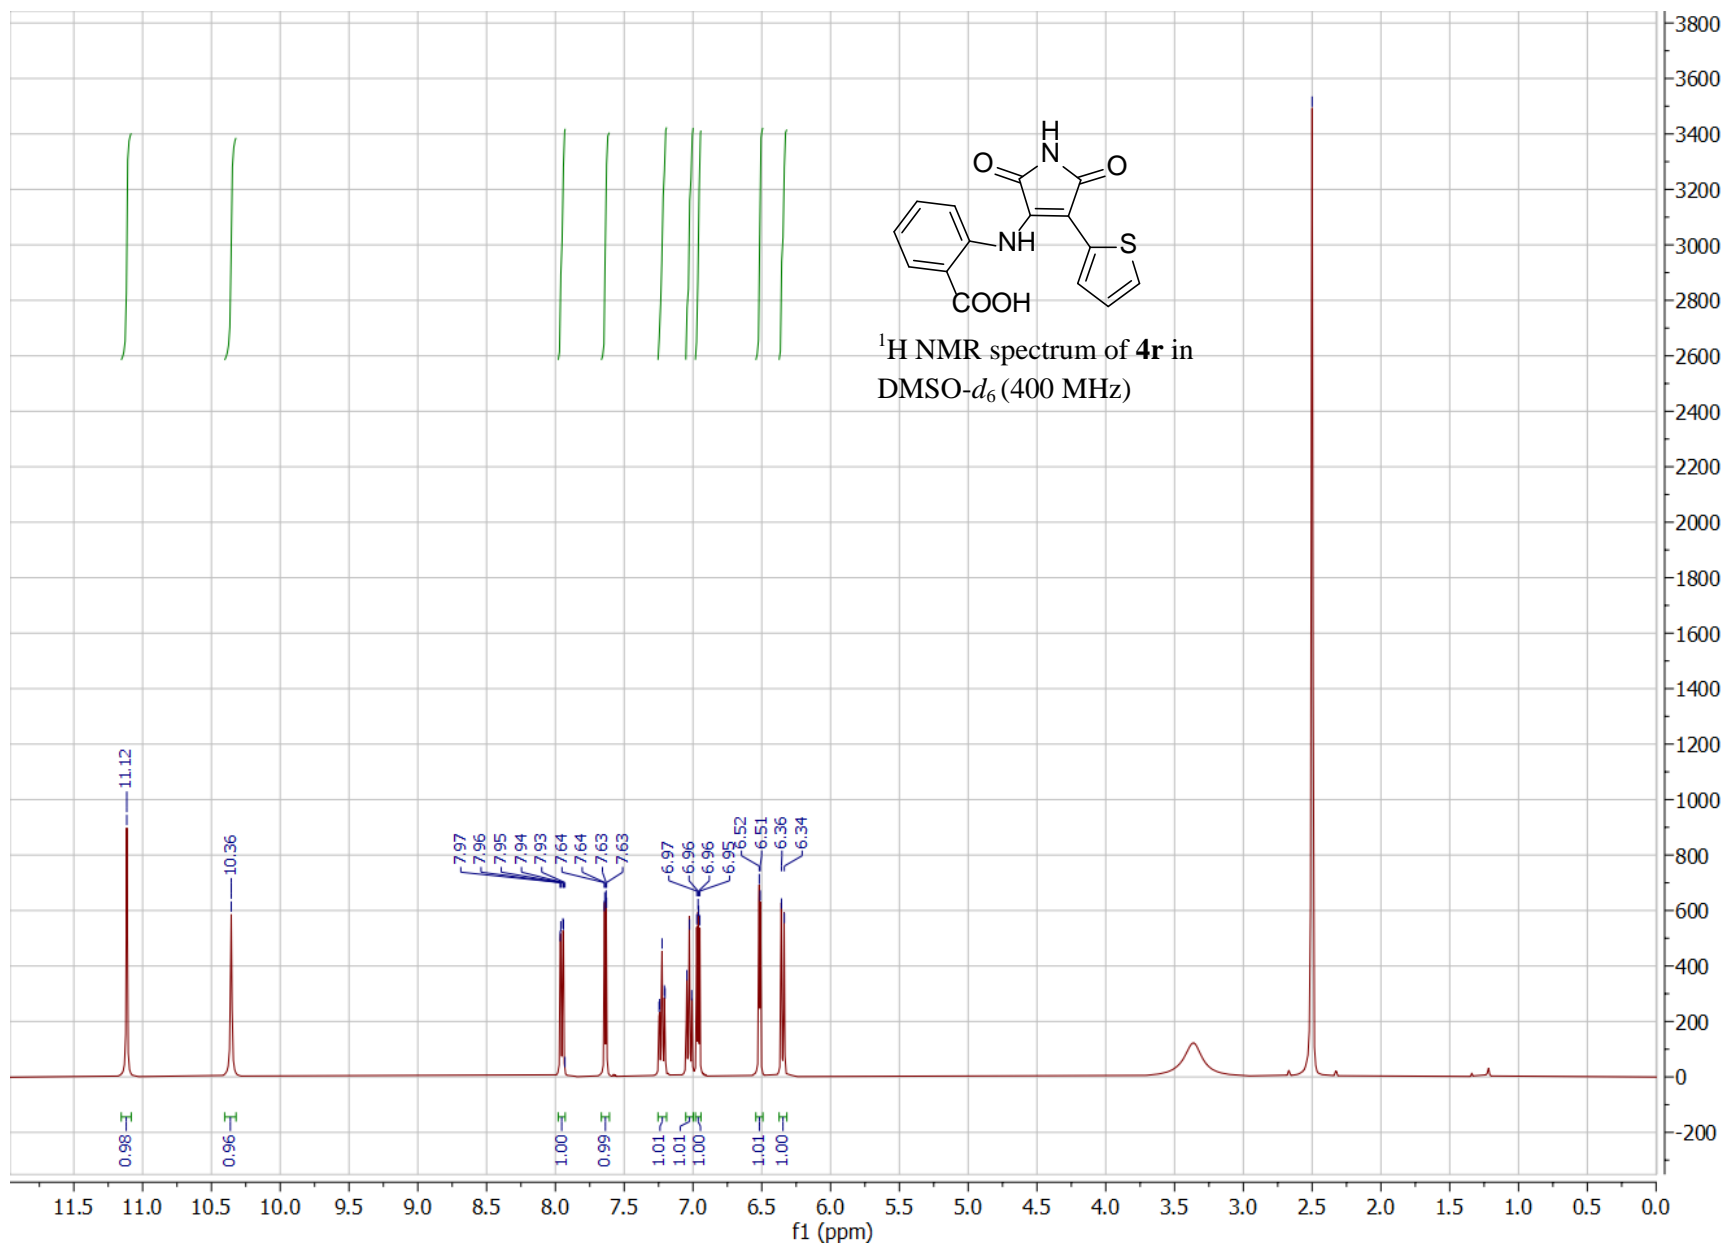

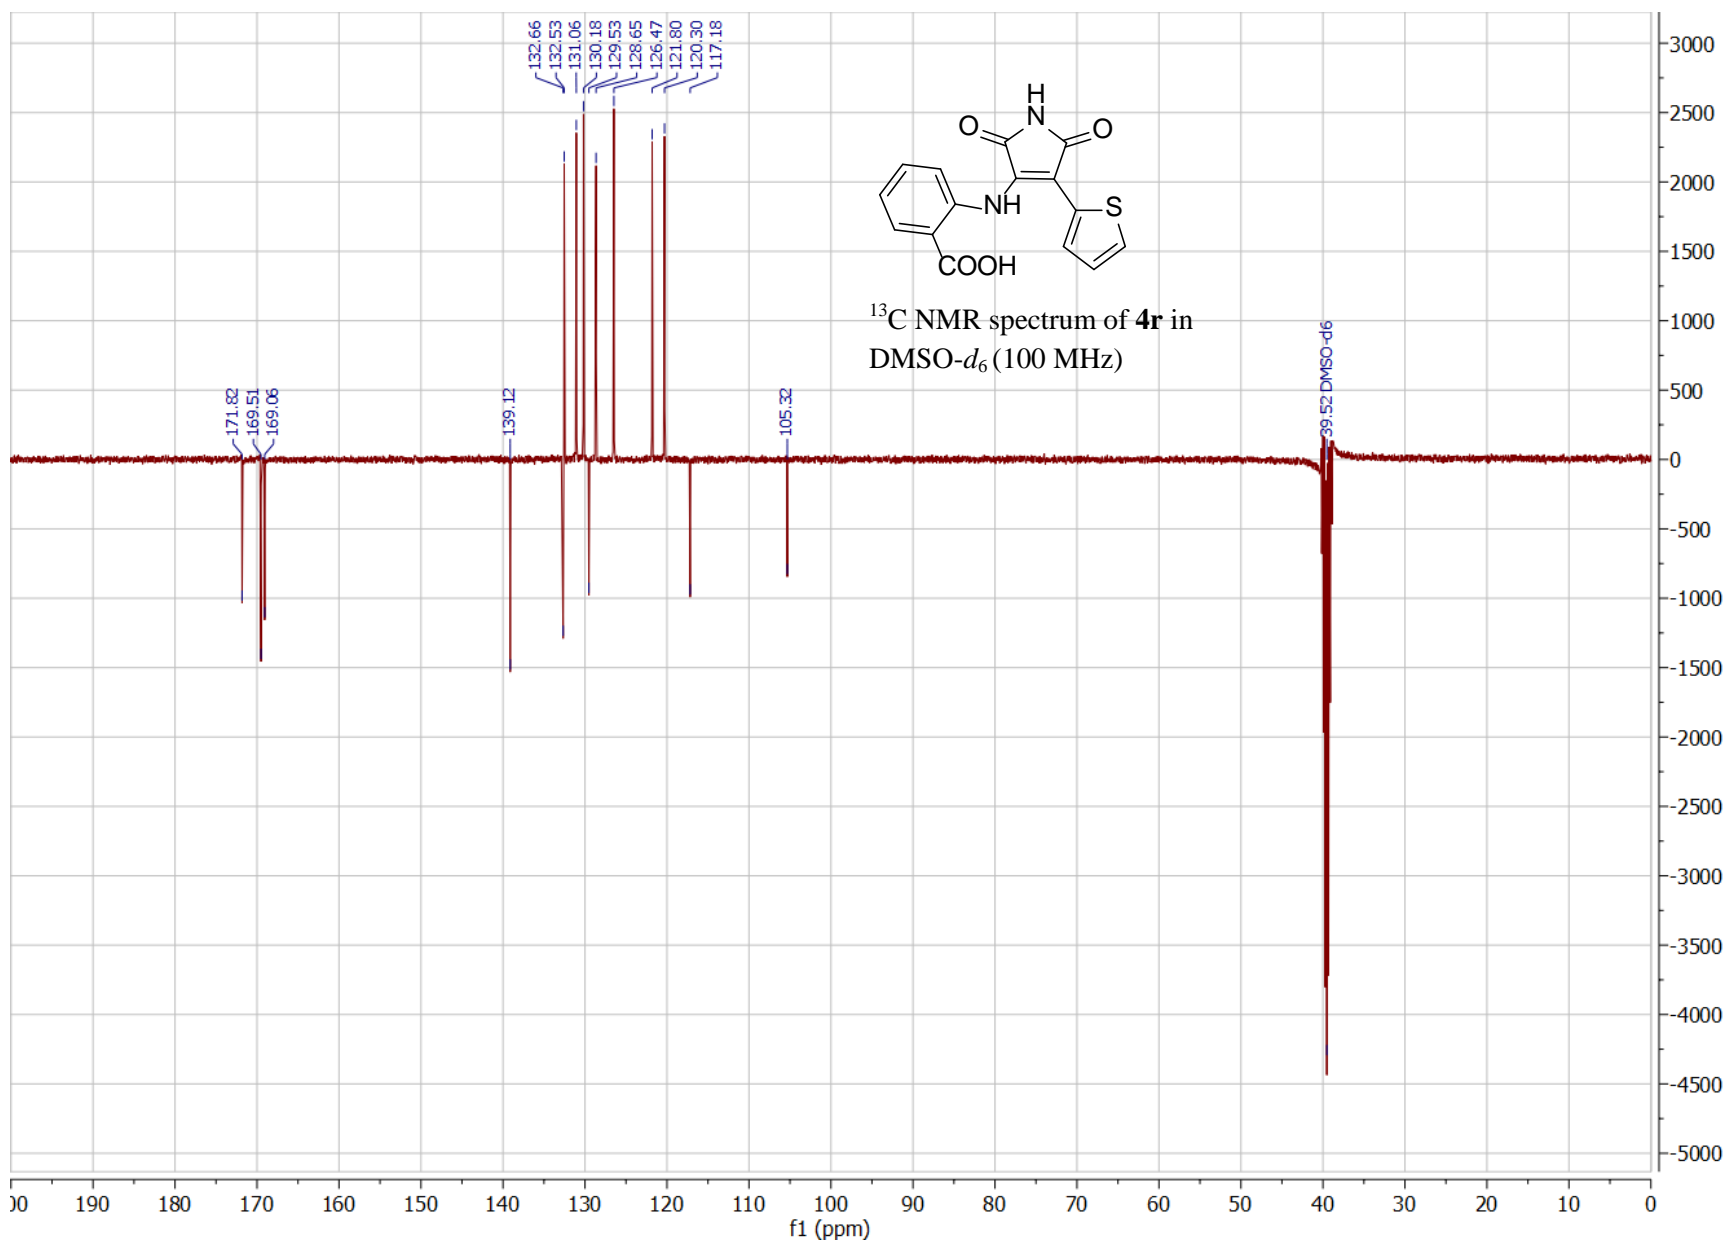

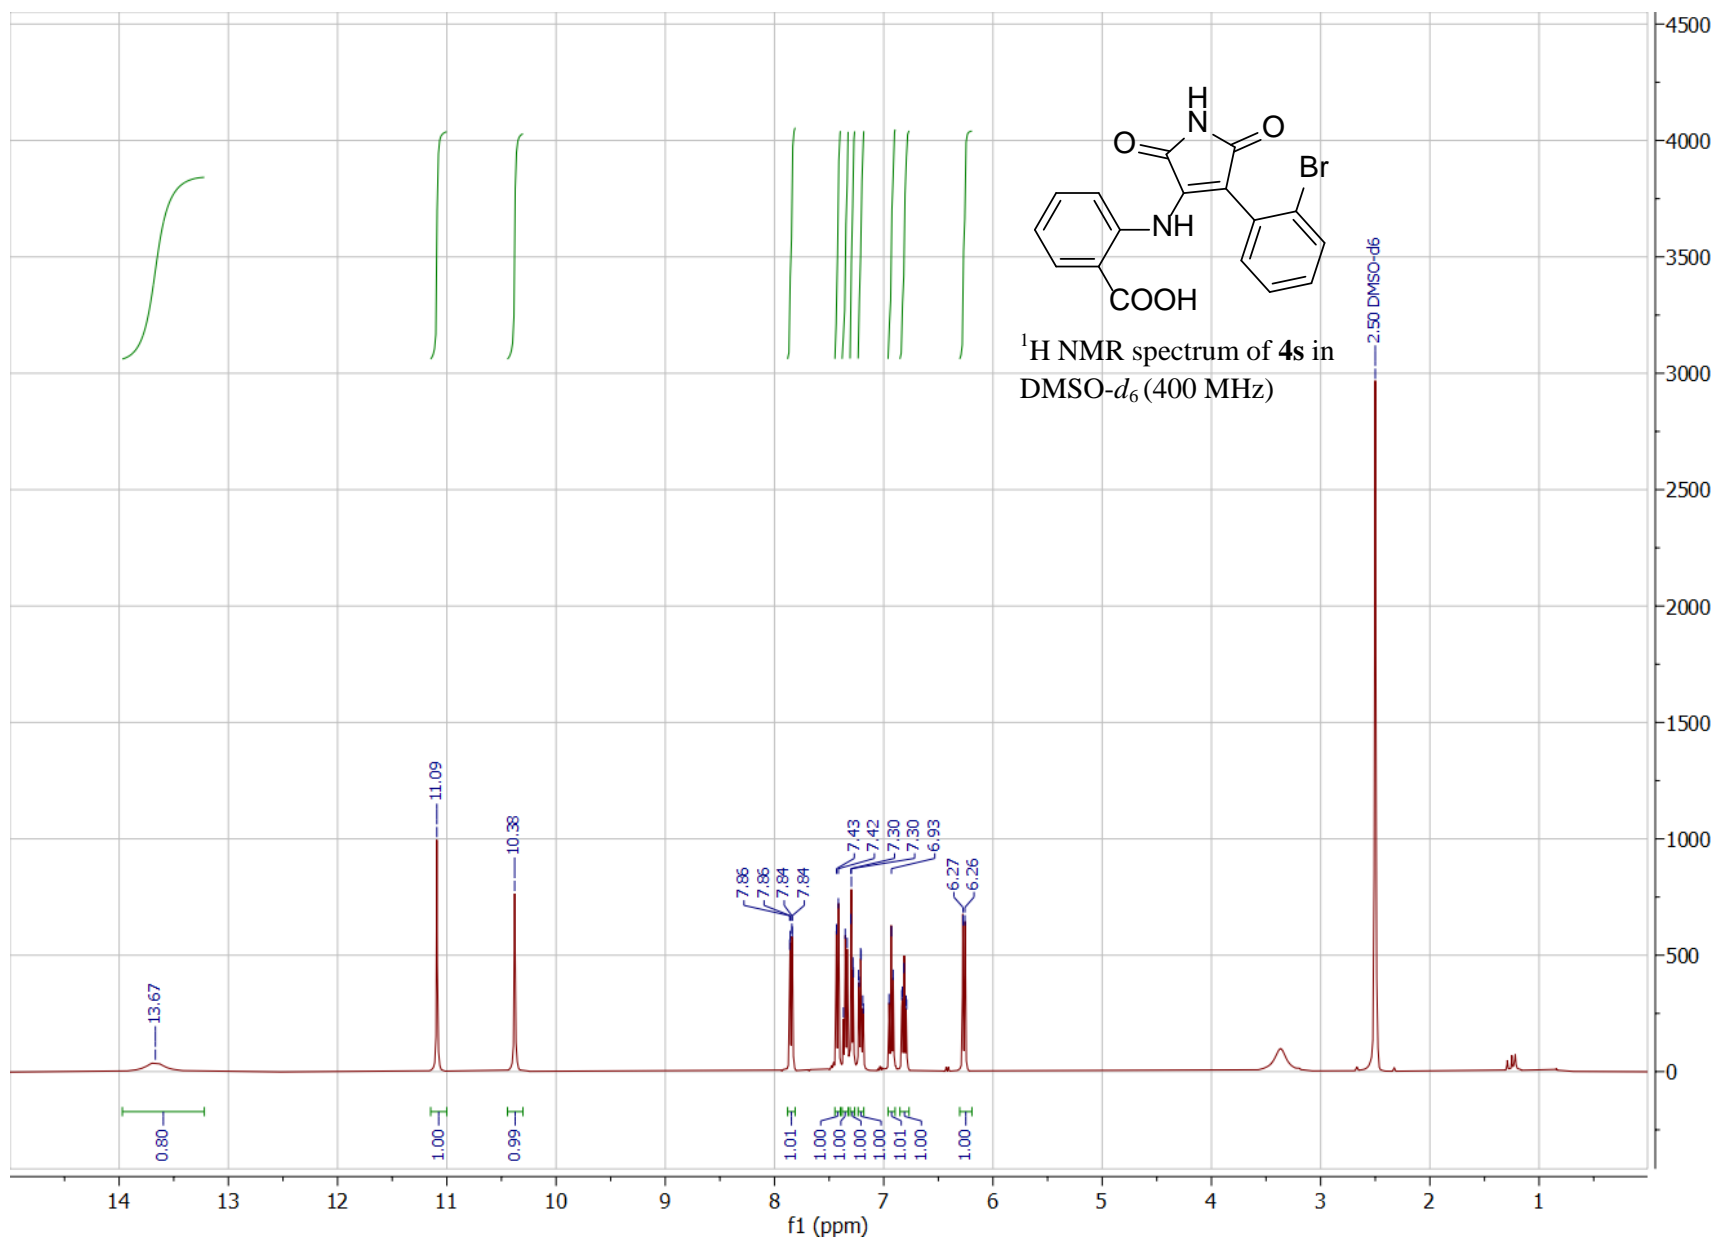

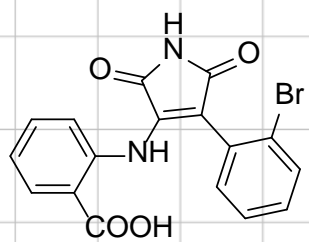

$^{13}\text{C}$  NMR spectrum of **4s** in DMSO- $d_6$  (100 MHz)

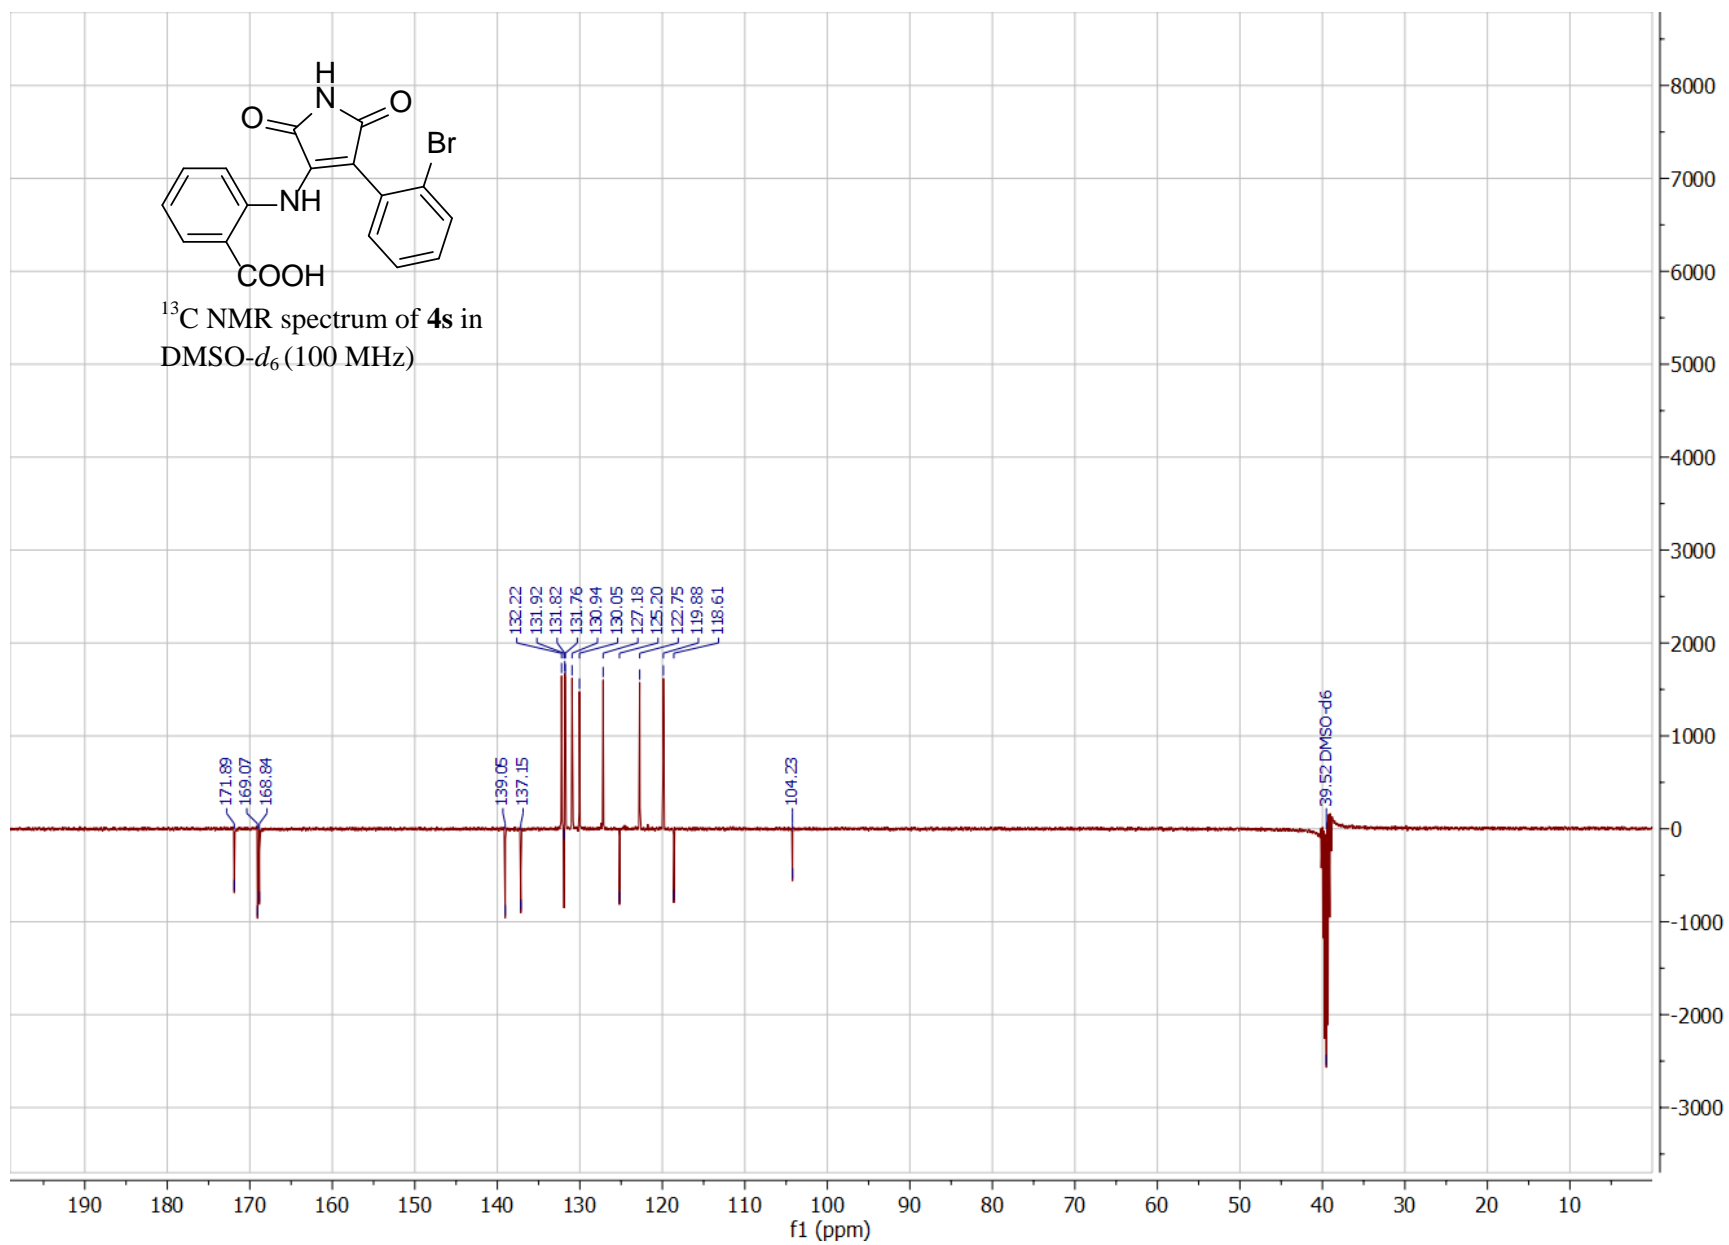

$^1\text{H}$  and  $^{13}\text{C}$  Spectral Charts for (Z)-2-((3-amino-1-cyano-3-oxo-2-(p-tolyl)prop-1-en-1-yl)amino)benzoic acid (**10b**)

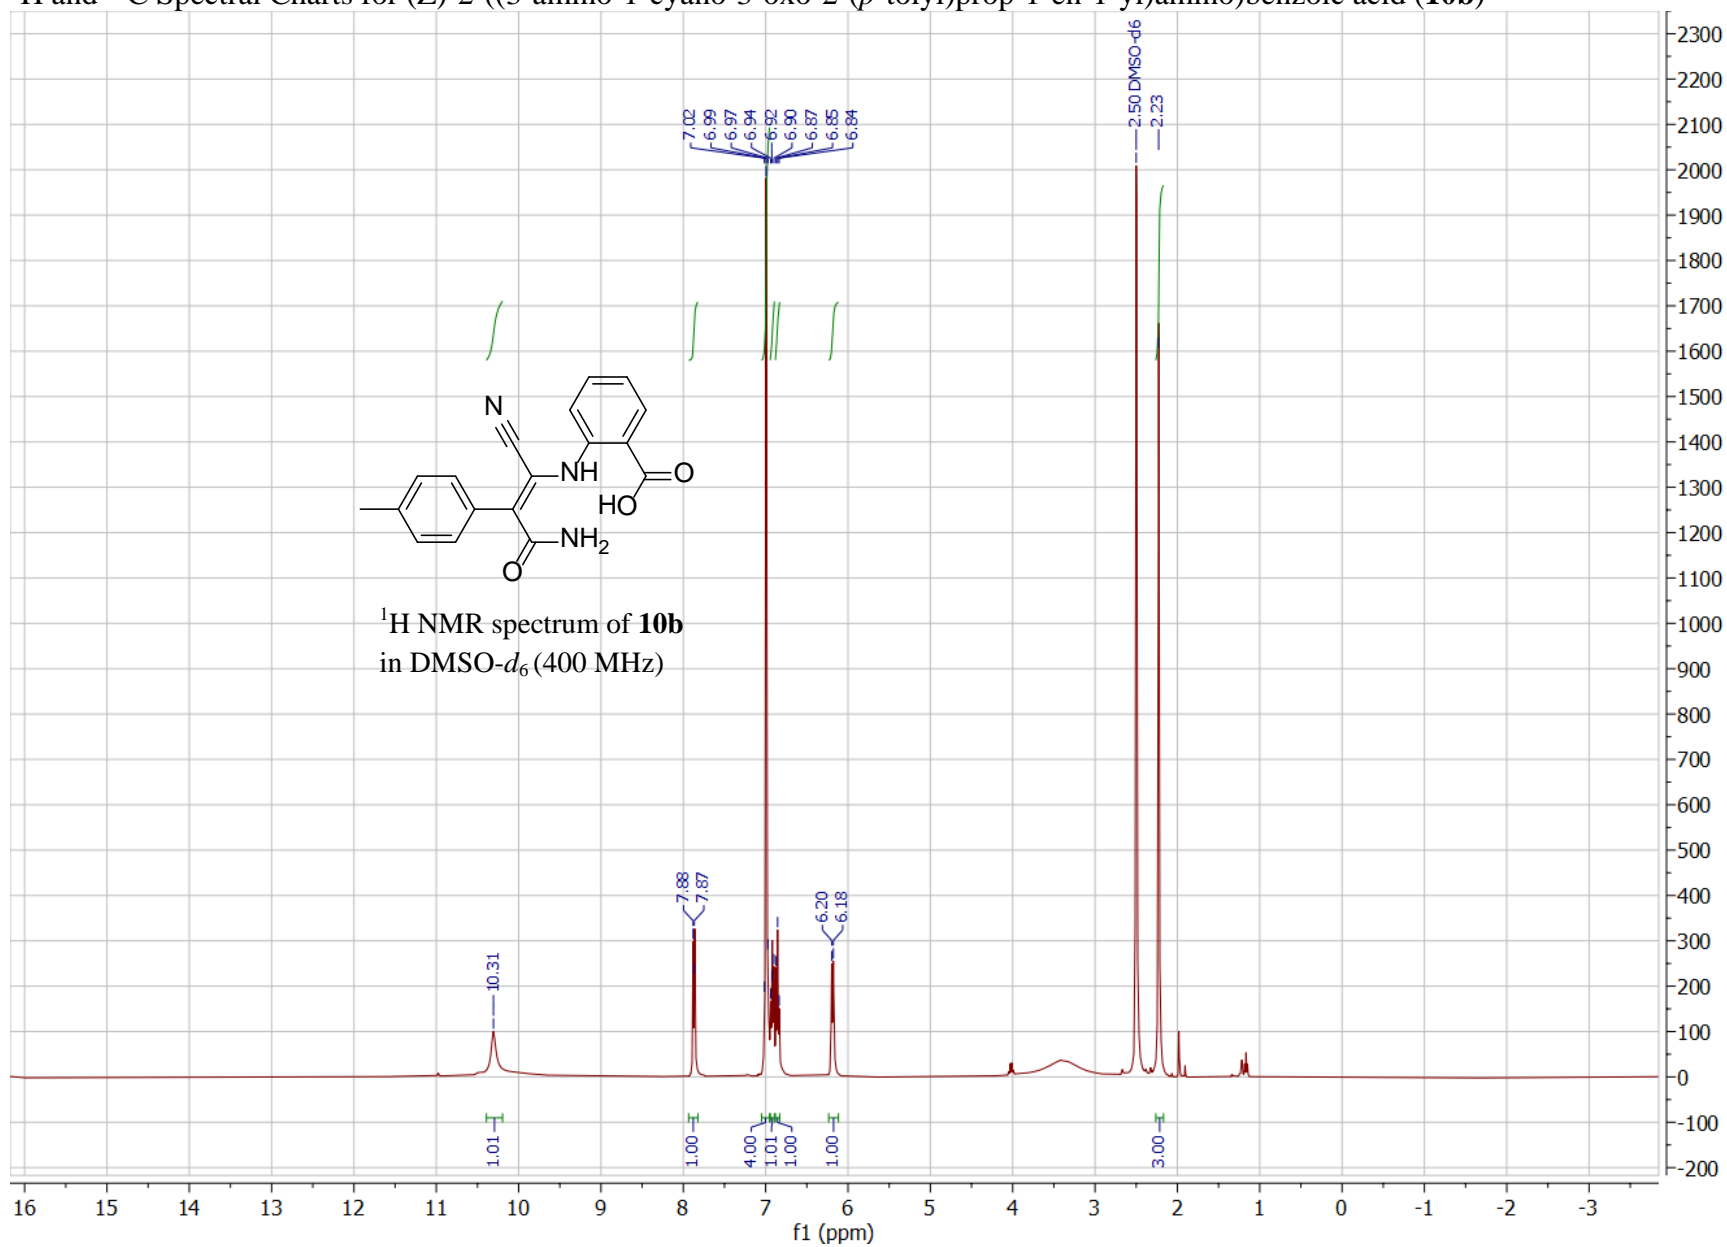

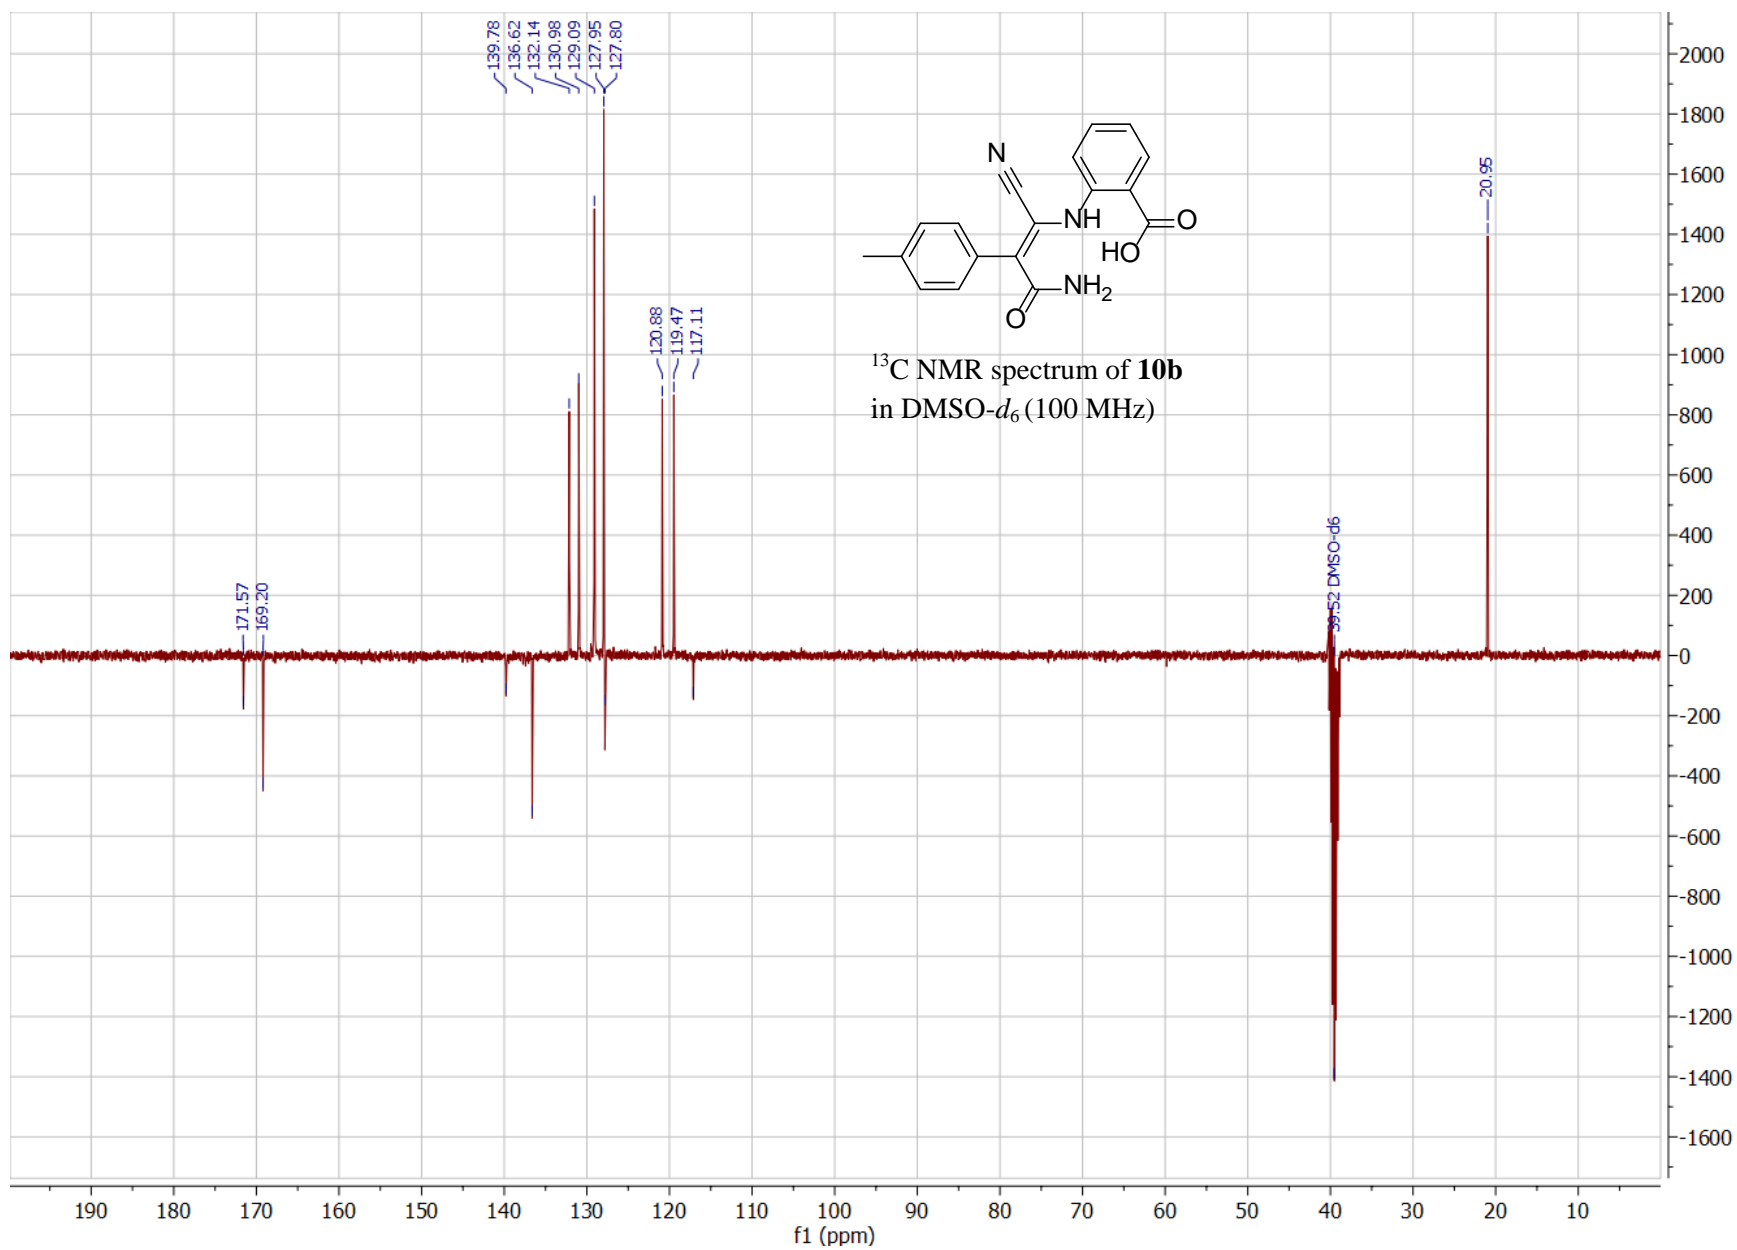



$^1\text{H}$  and  $^{13}\text{C}$  Spectral Charts for acetic 2-(6-cyano-2-methyl-4-oxo-5-(*p*-tolyl)pyrimidin-1(4*H*)-yl)benzoic anhydride (**11b**)

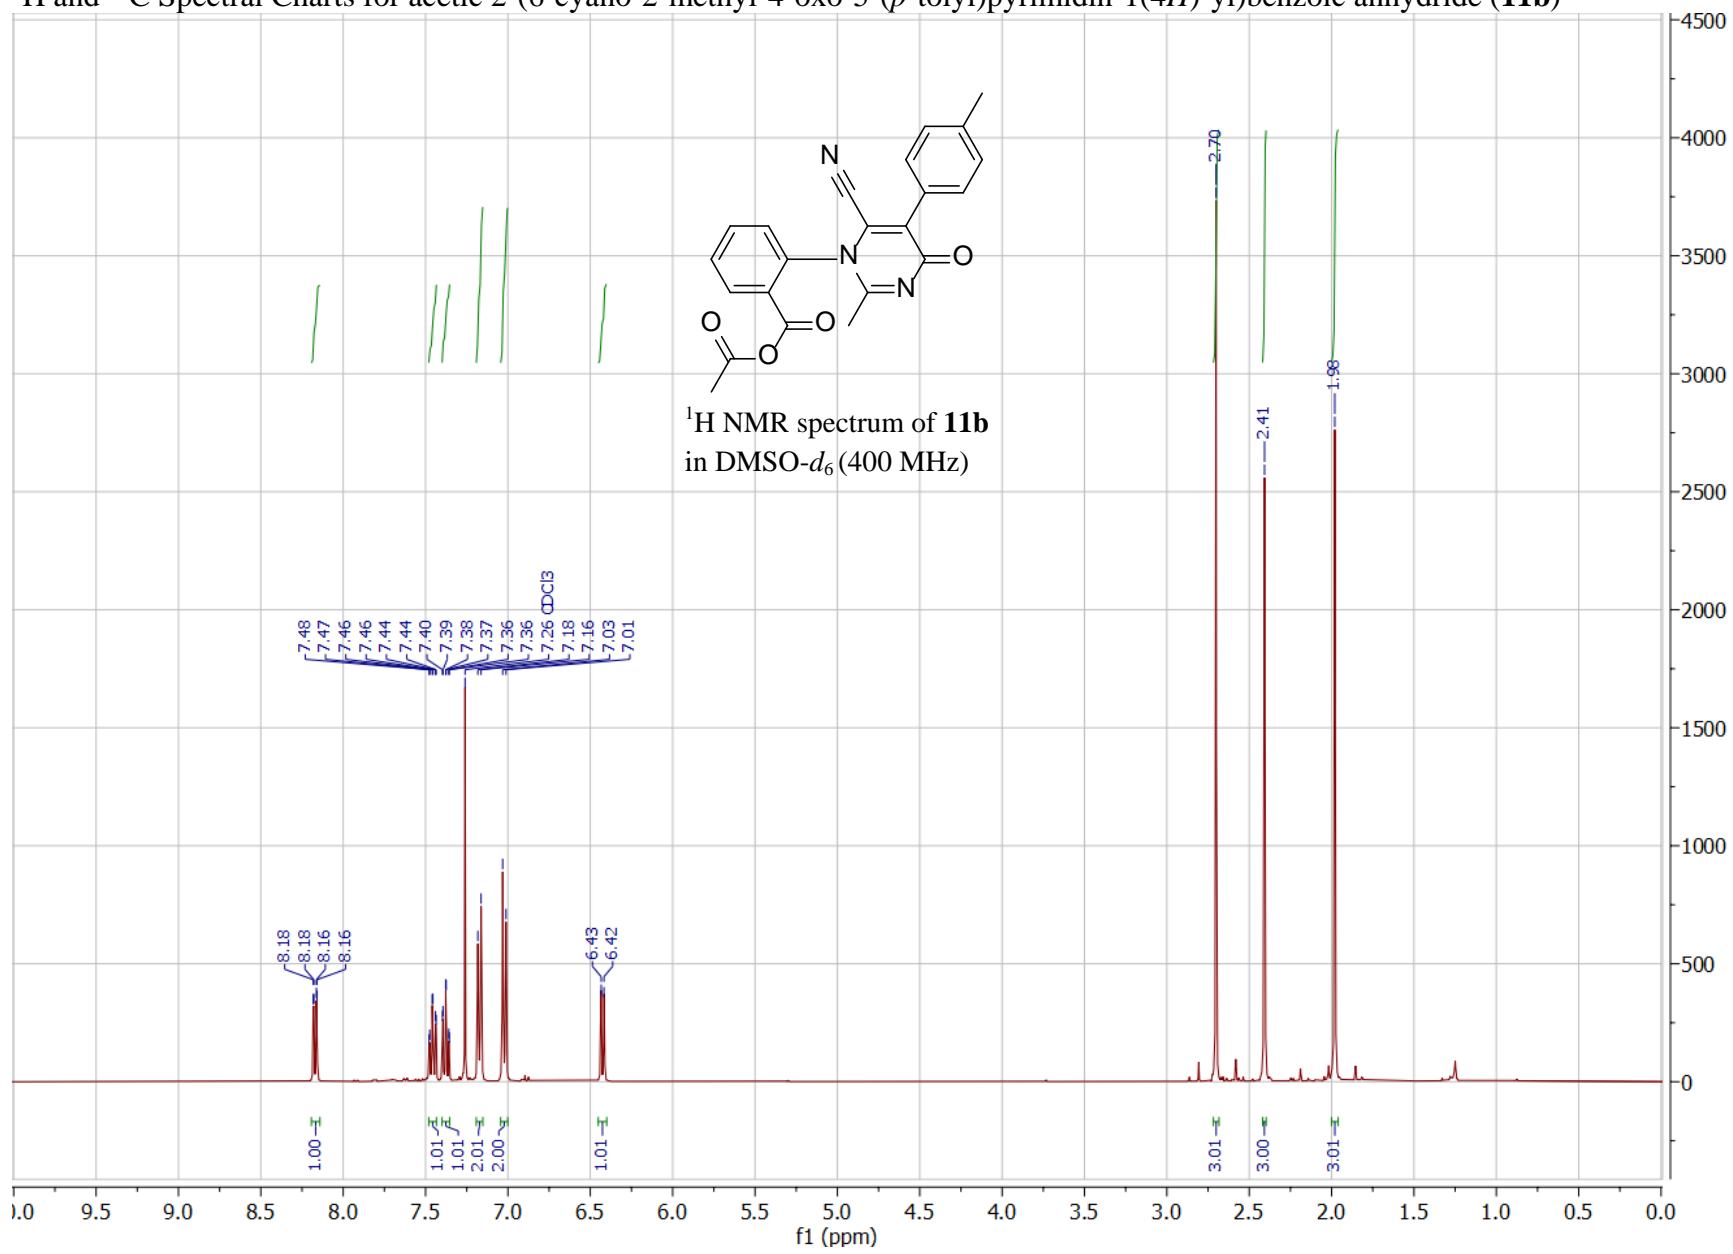

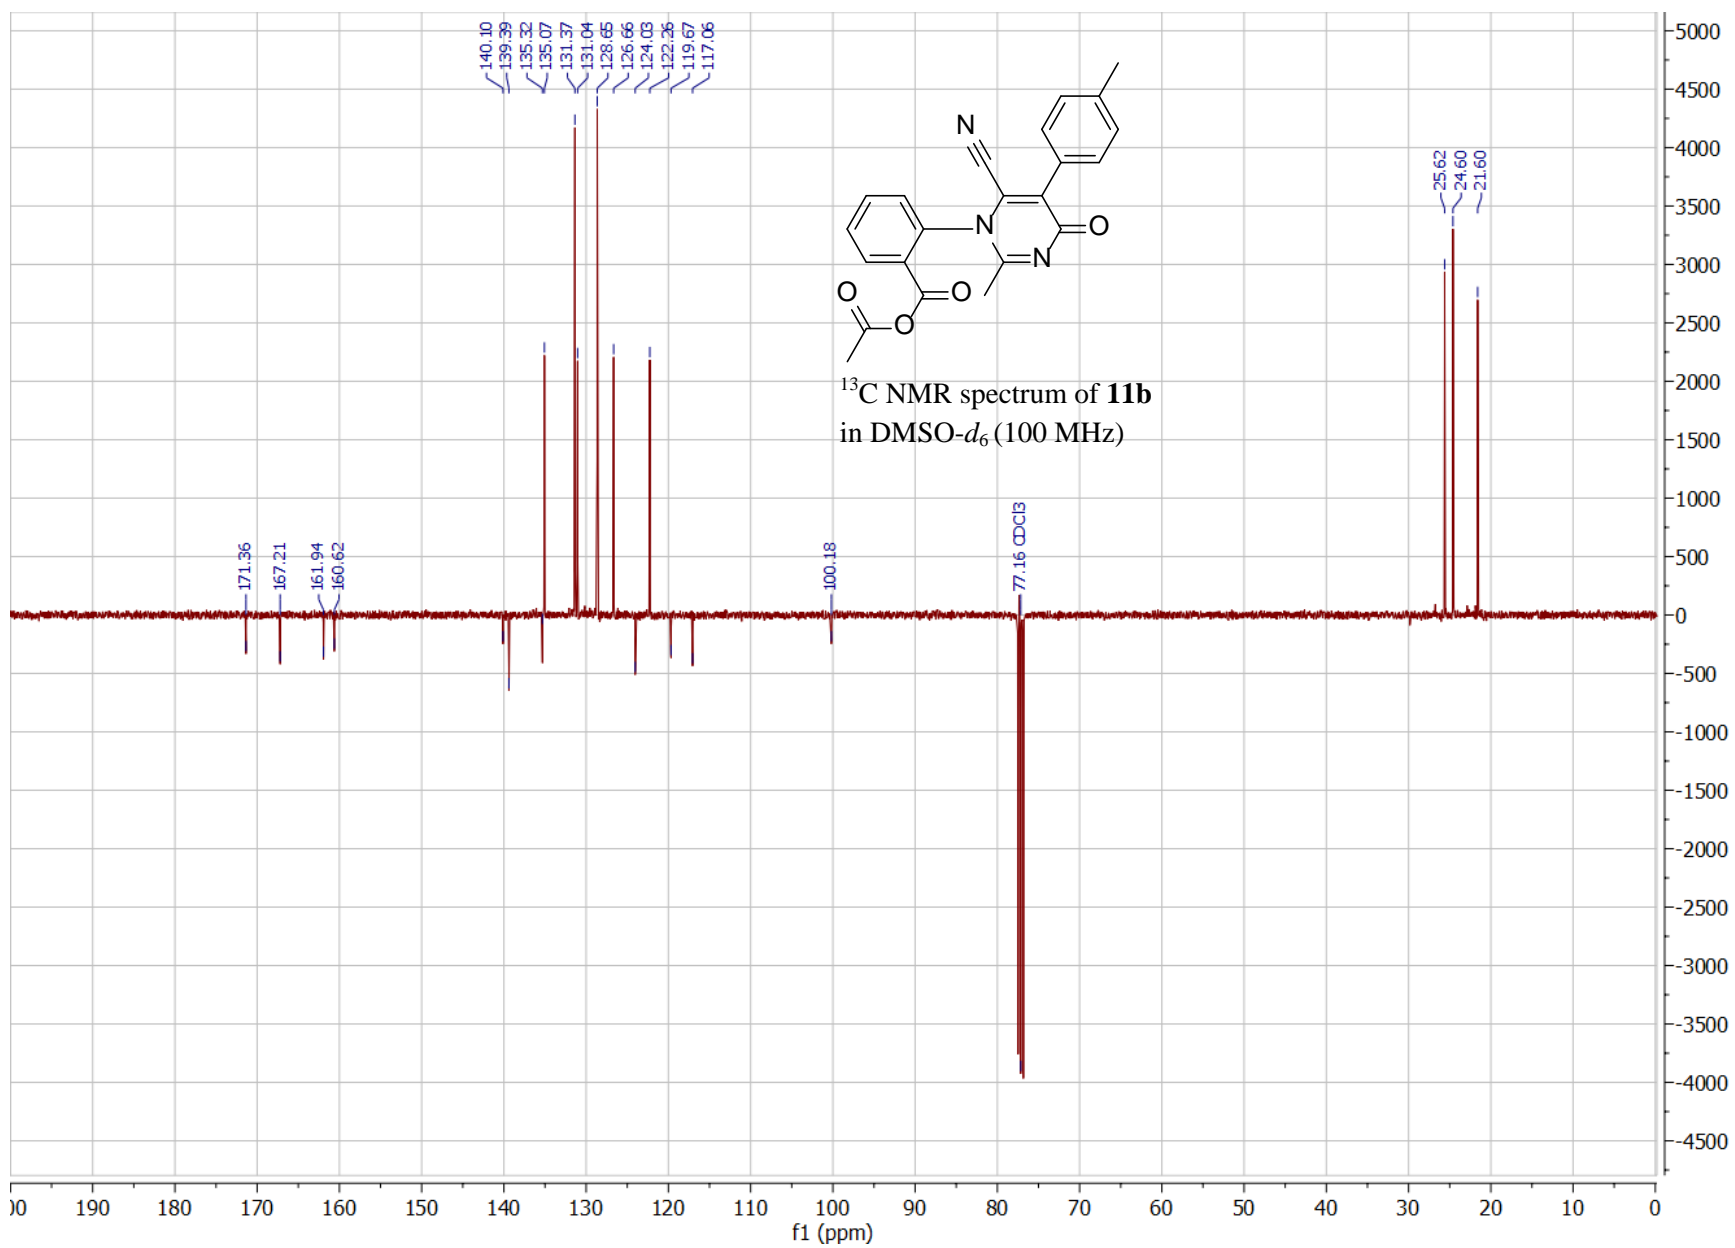

$^1\text{H}$  and  $^{13}\text{C}$  Spectral Charts for 2-((2,5-dioxo-4-phenyl-2,5-dihydro-1H-pyrrol-3-yl)amino)-N-methylbenzamide (**12**)

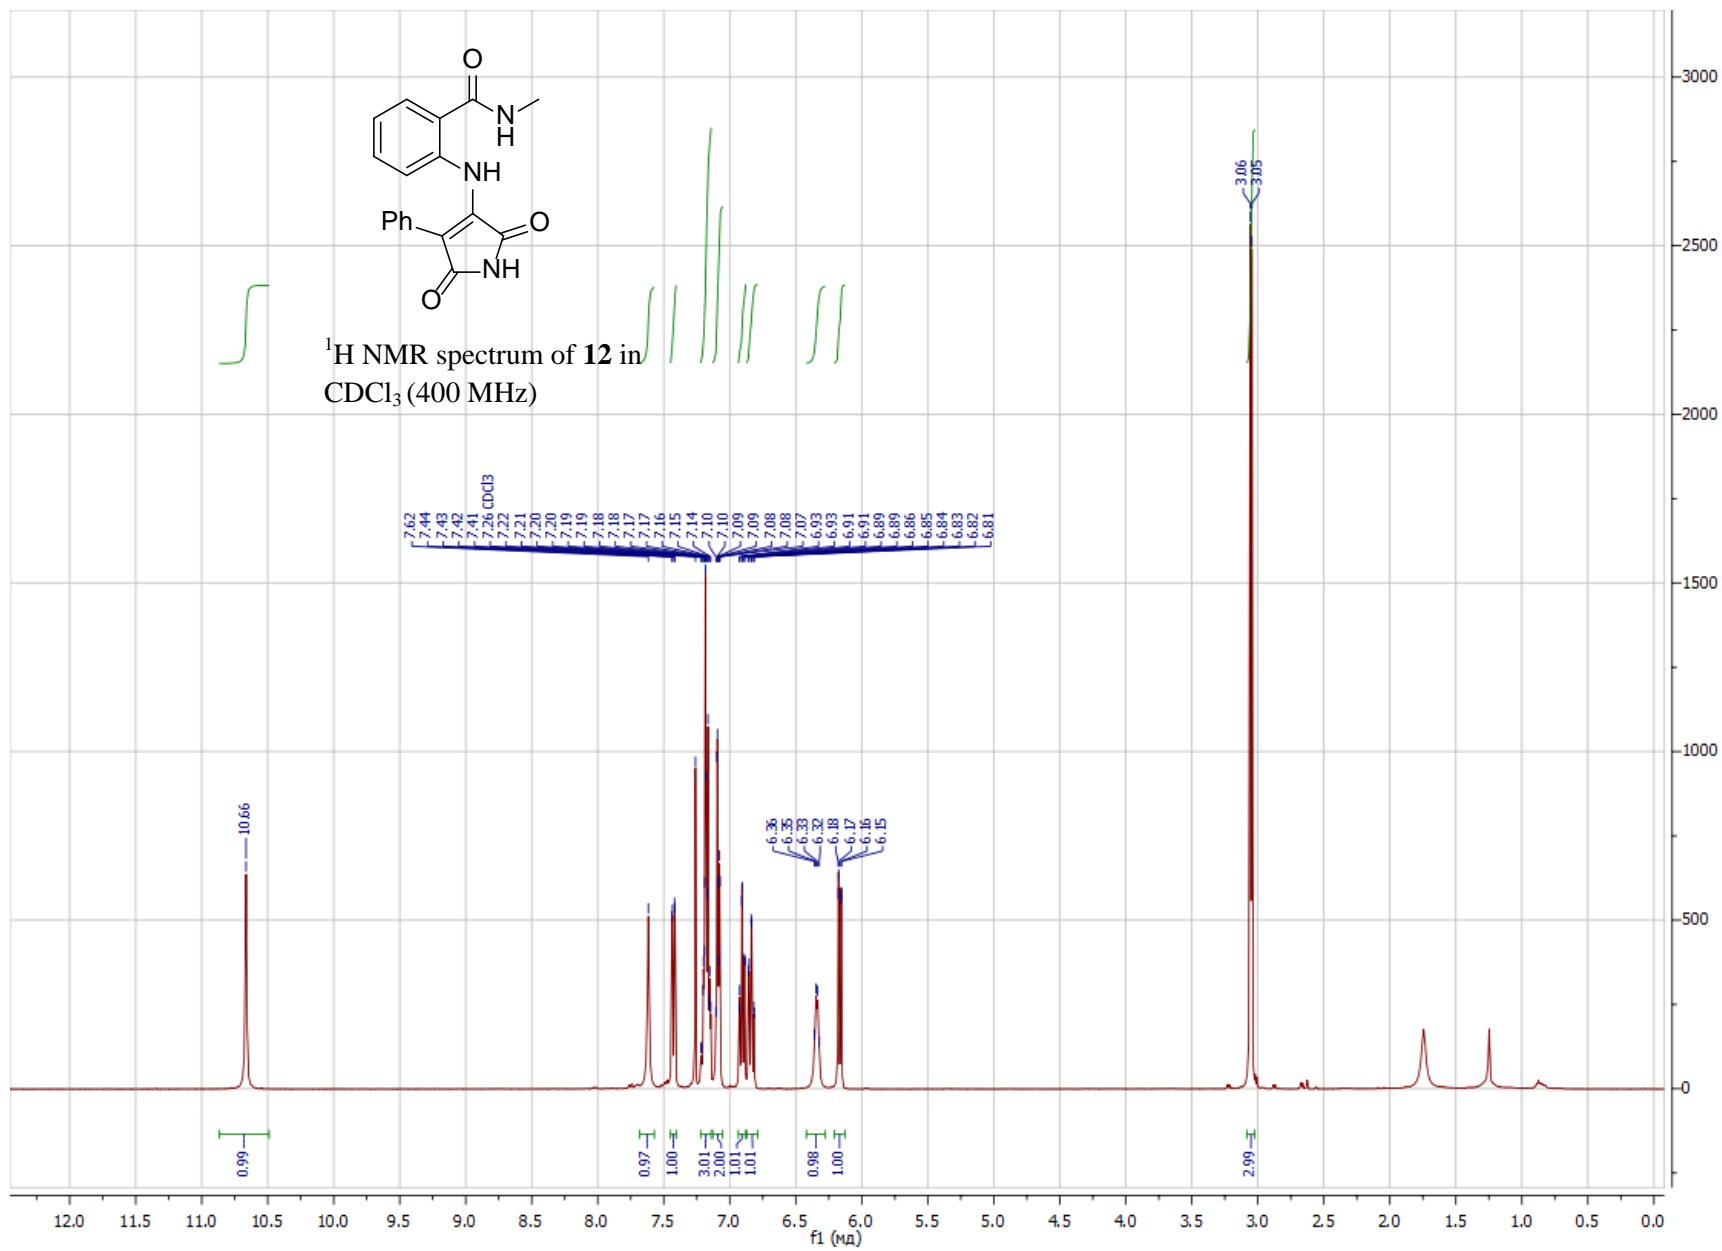

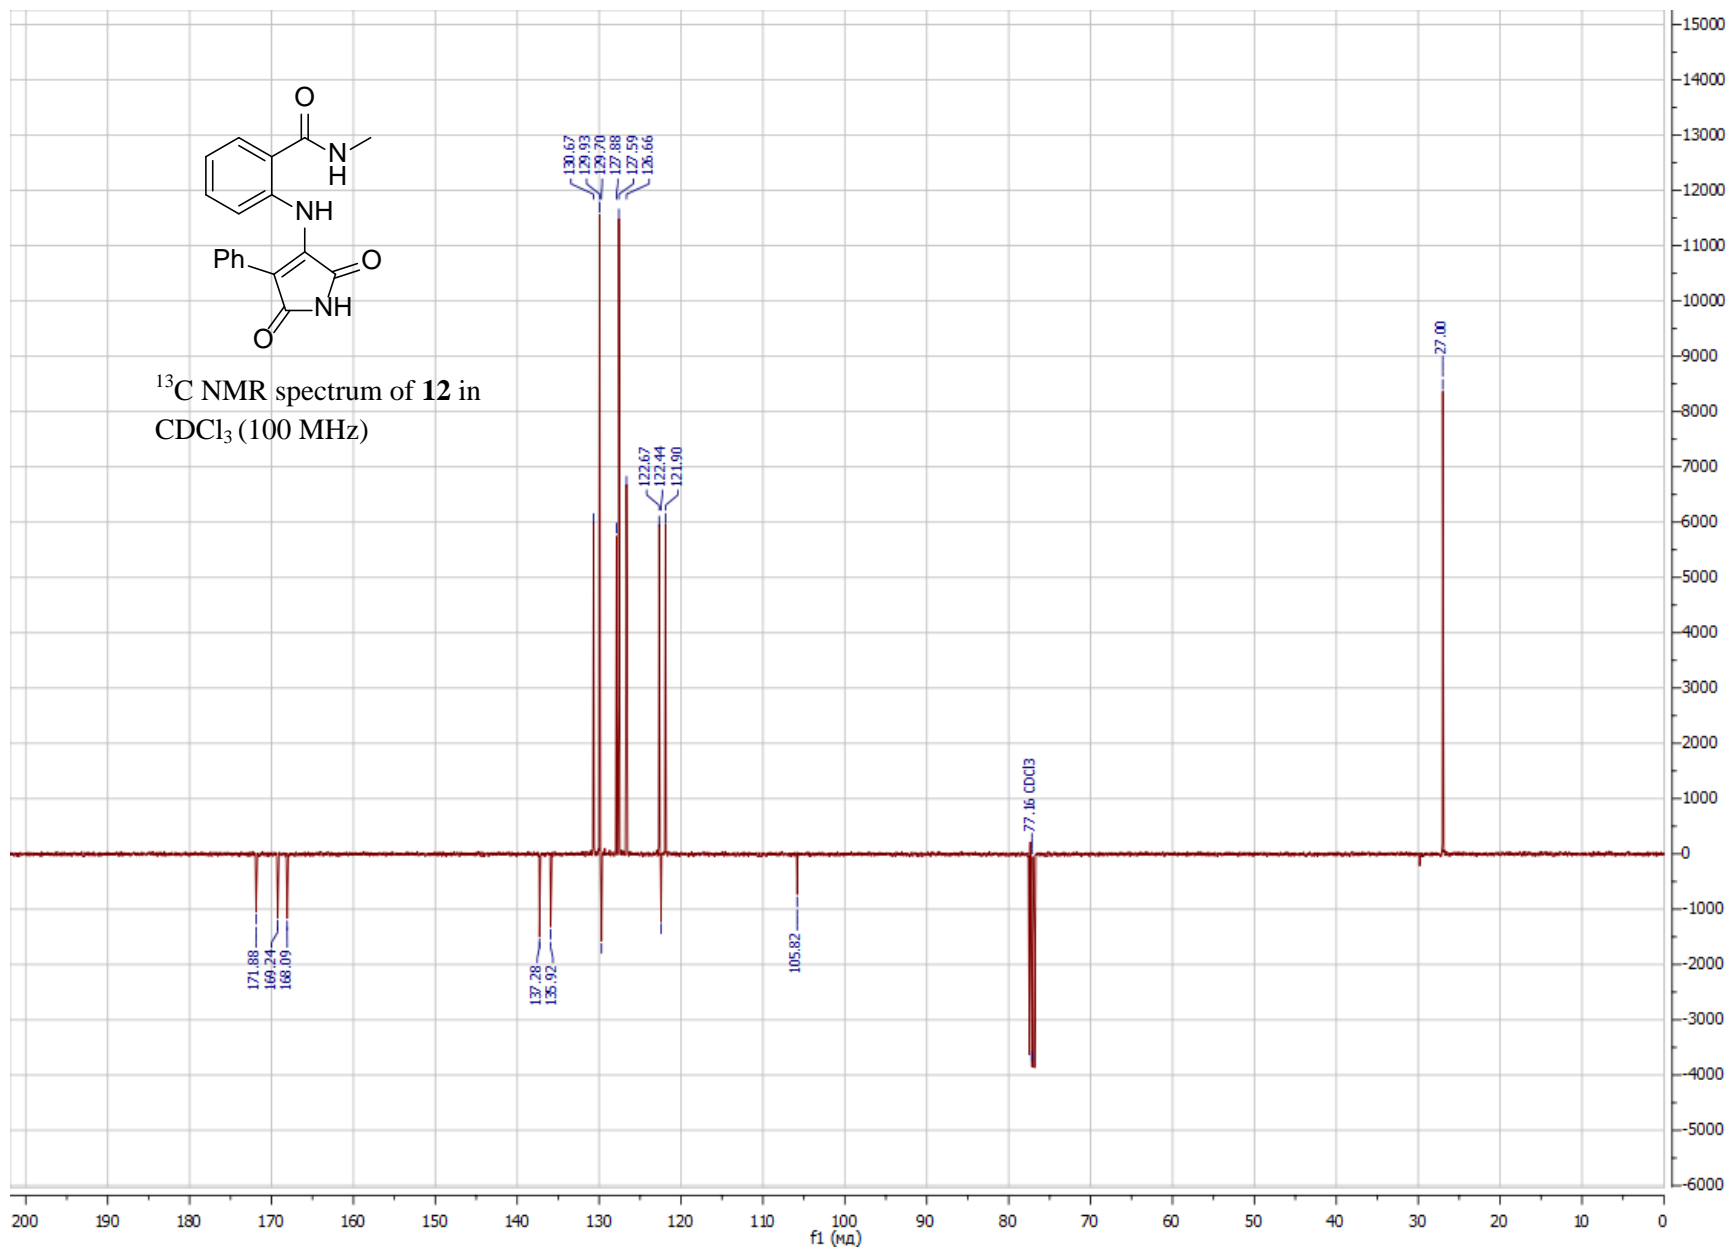

$^1\text{H}$  and  $^{13}\text{C}$  Spectral Charts for methyl 2-((2,5-dioxo-4-phenyl-2,5-dihydro-1H-pyrrol-3-yl)amino)benzoate (**13**)

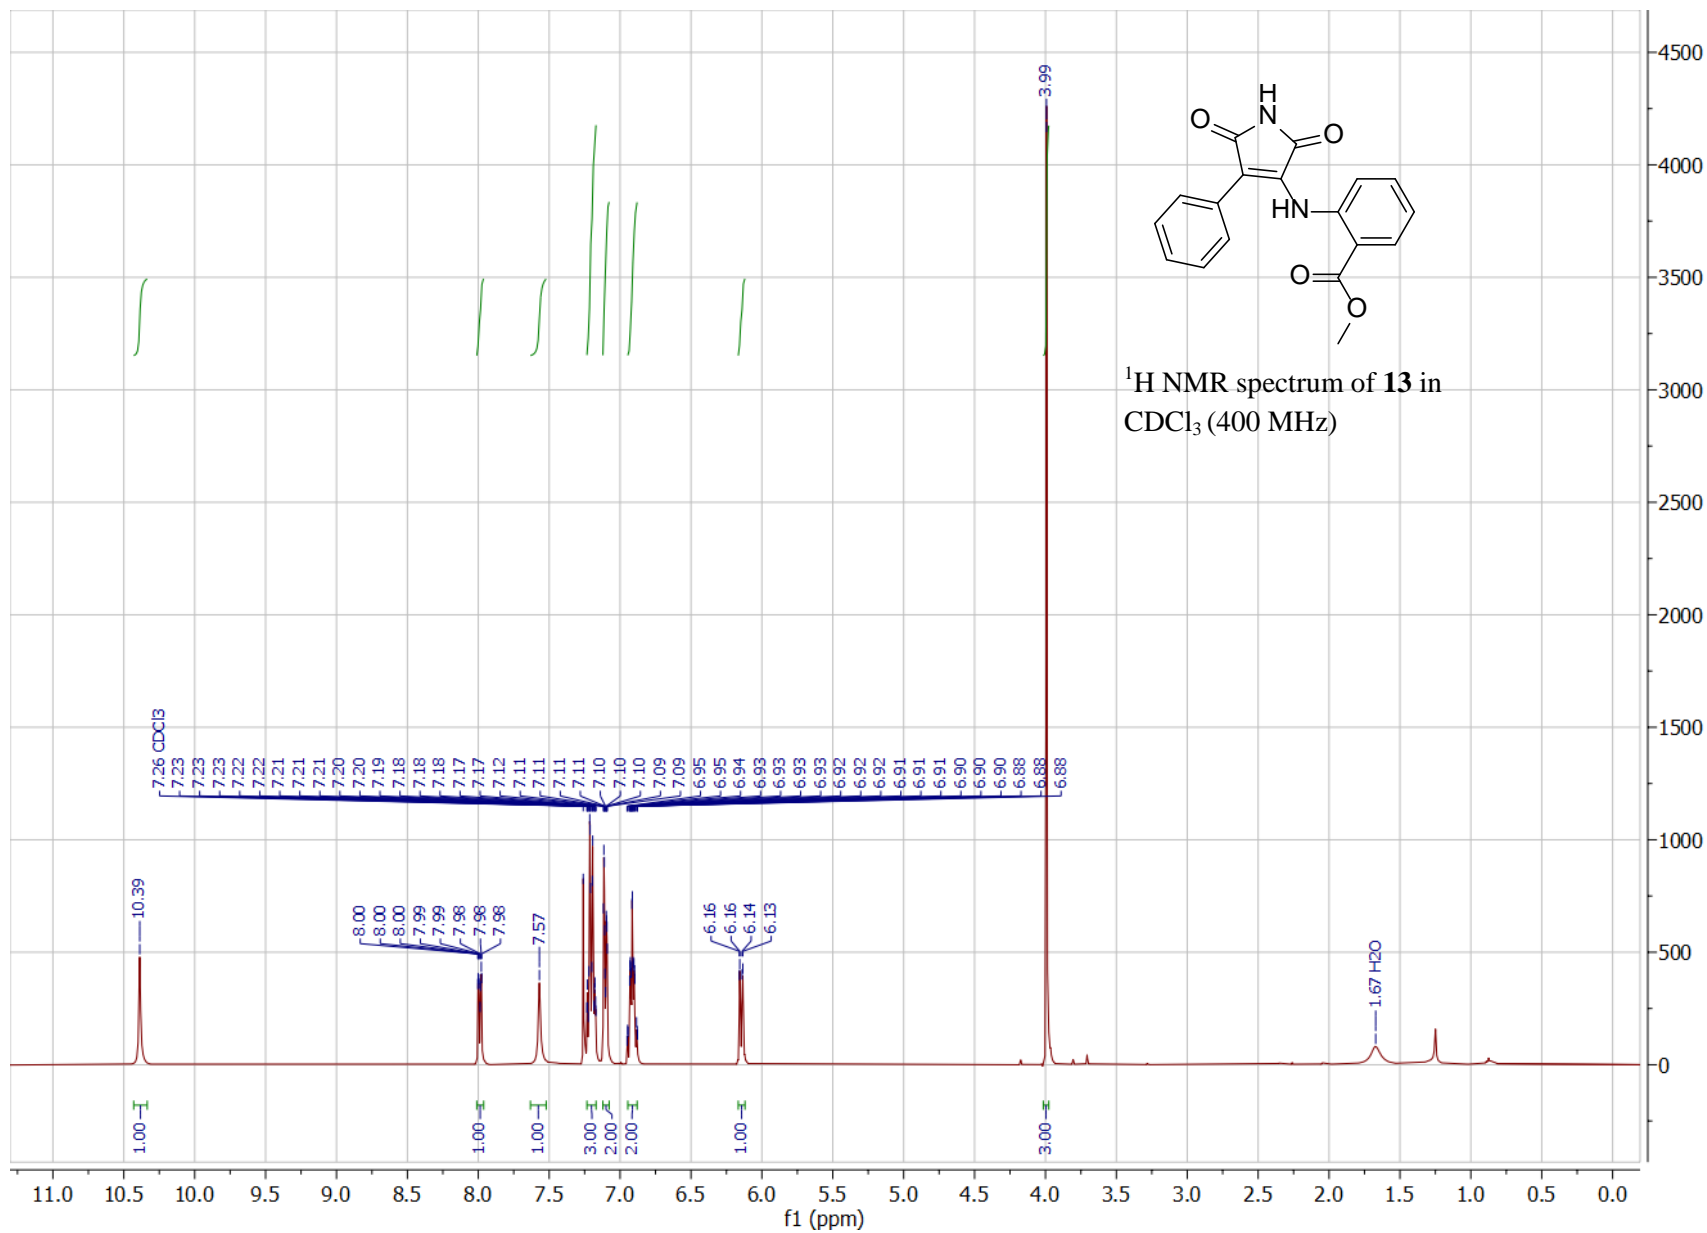

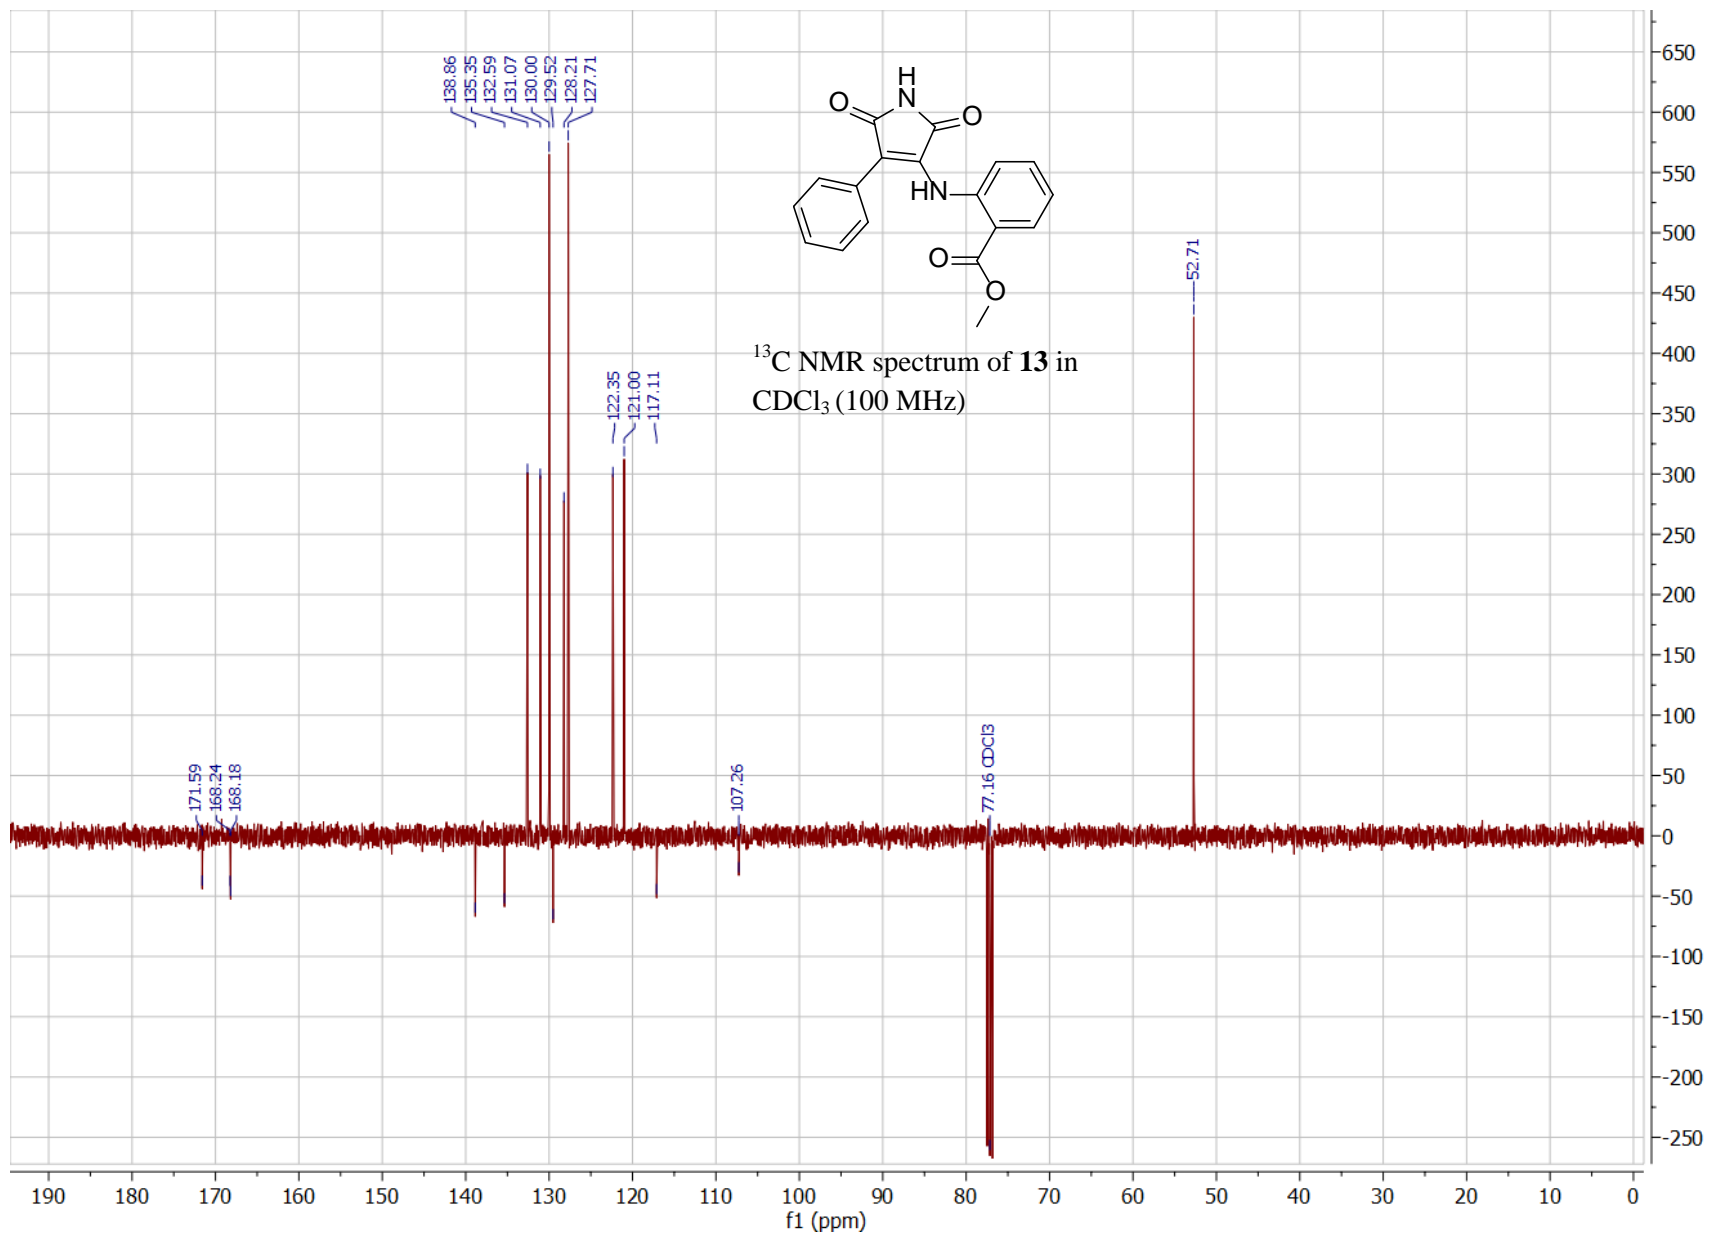

$^1\text{H}$  and  $^{13}\text{C}$  Spectral Charts for methyl 2-((1-methyl-2,5-dioxo-4-phenyl-2,5-dihydro-1H-pyrrol-3-yl)amino)benzoate (**14**)

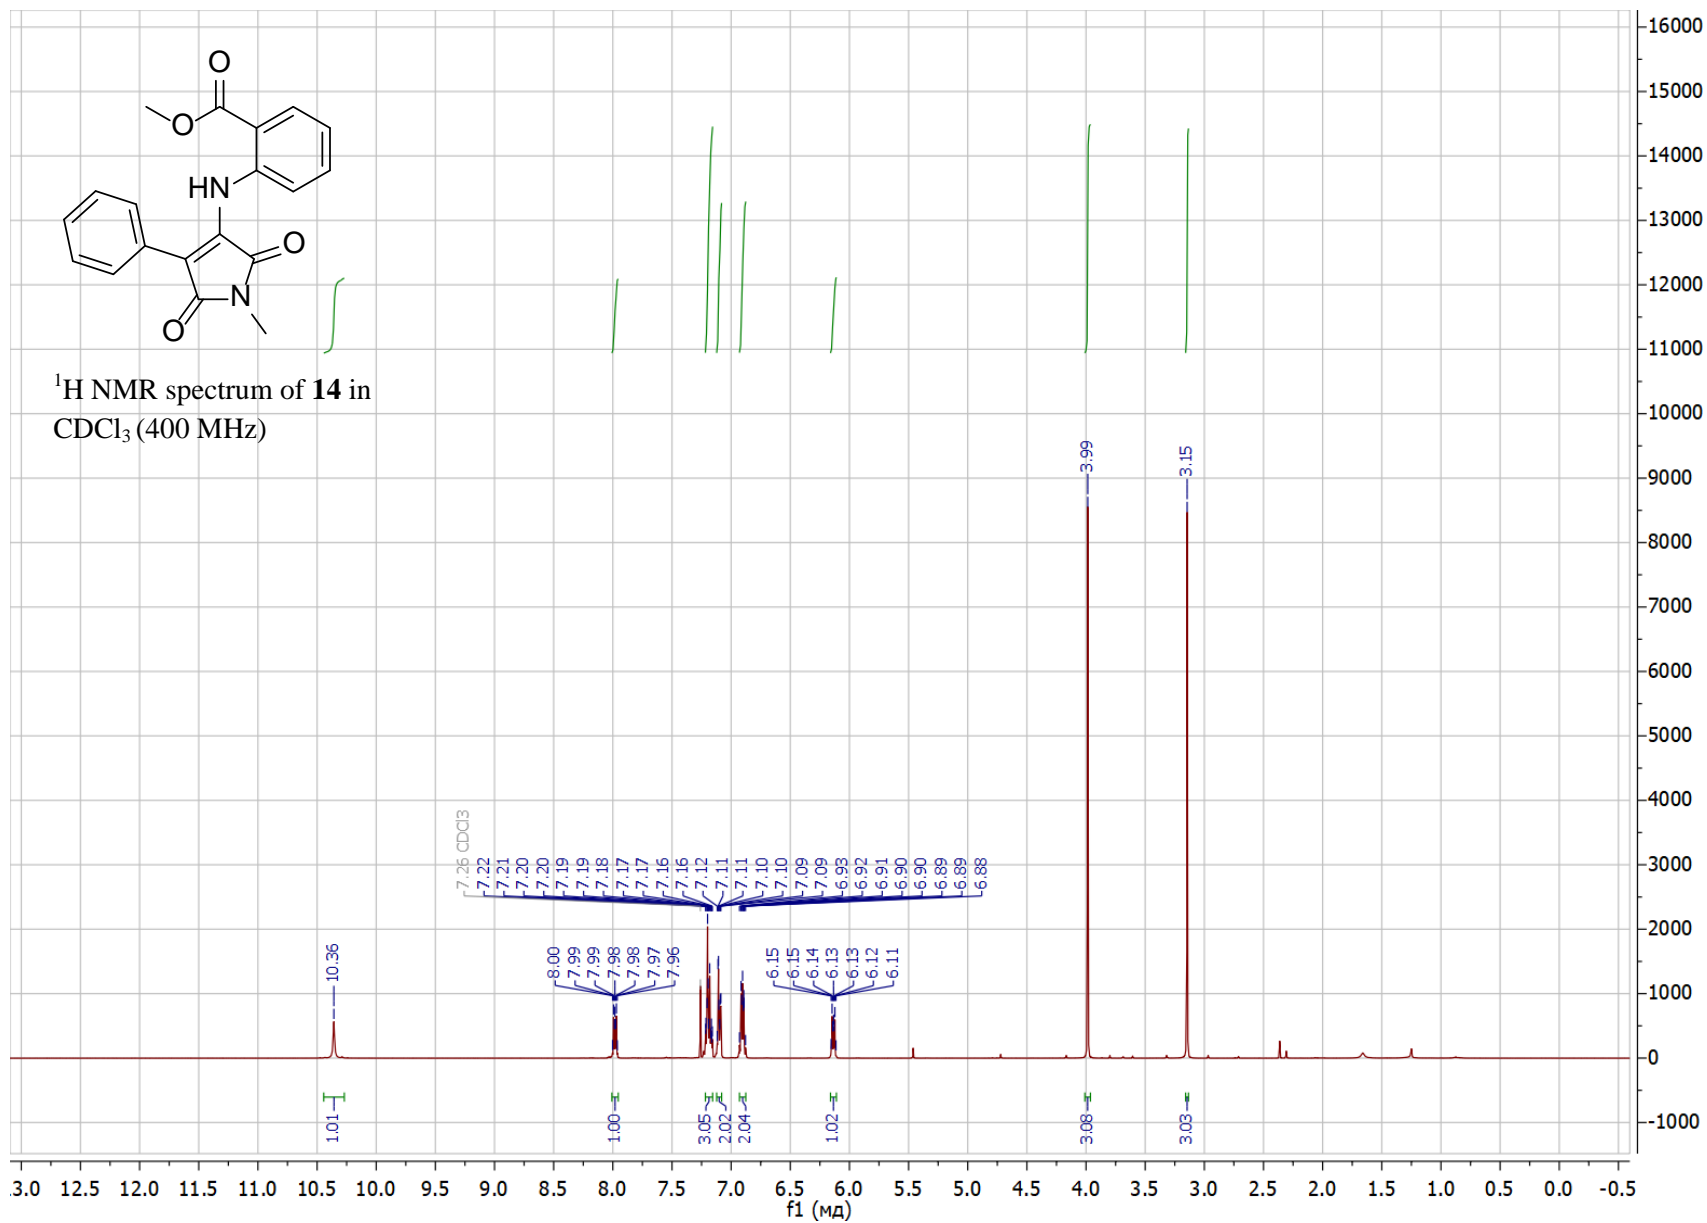

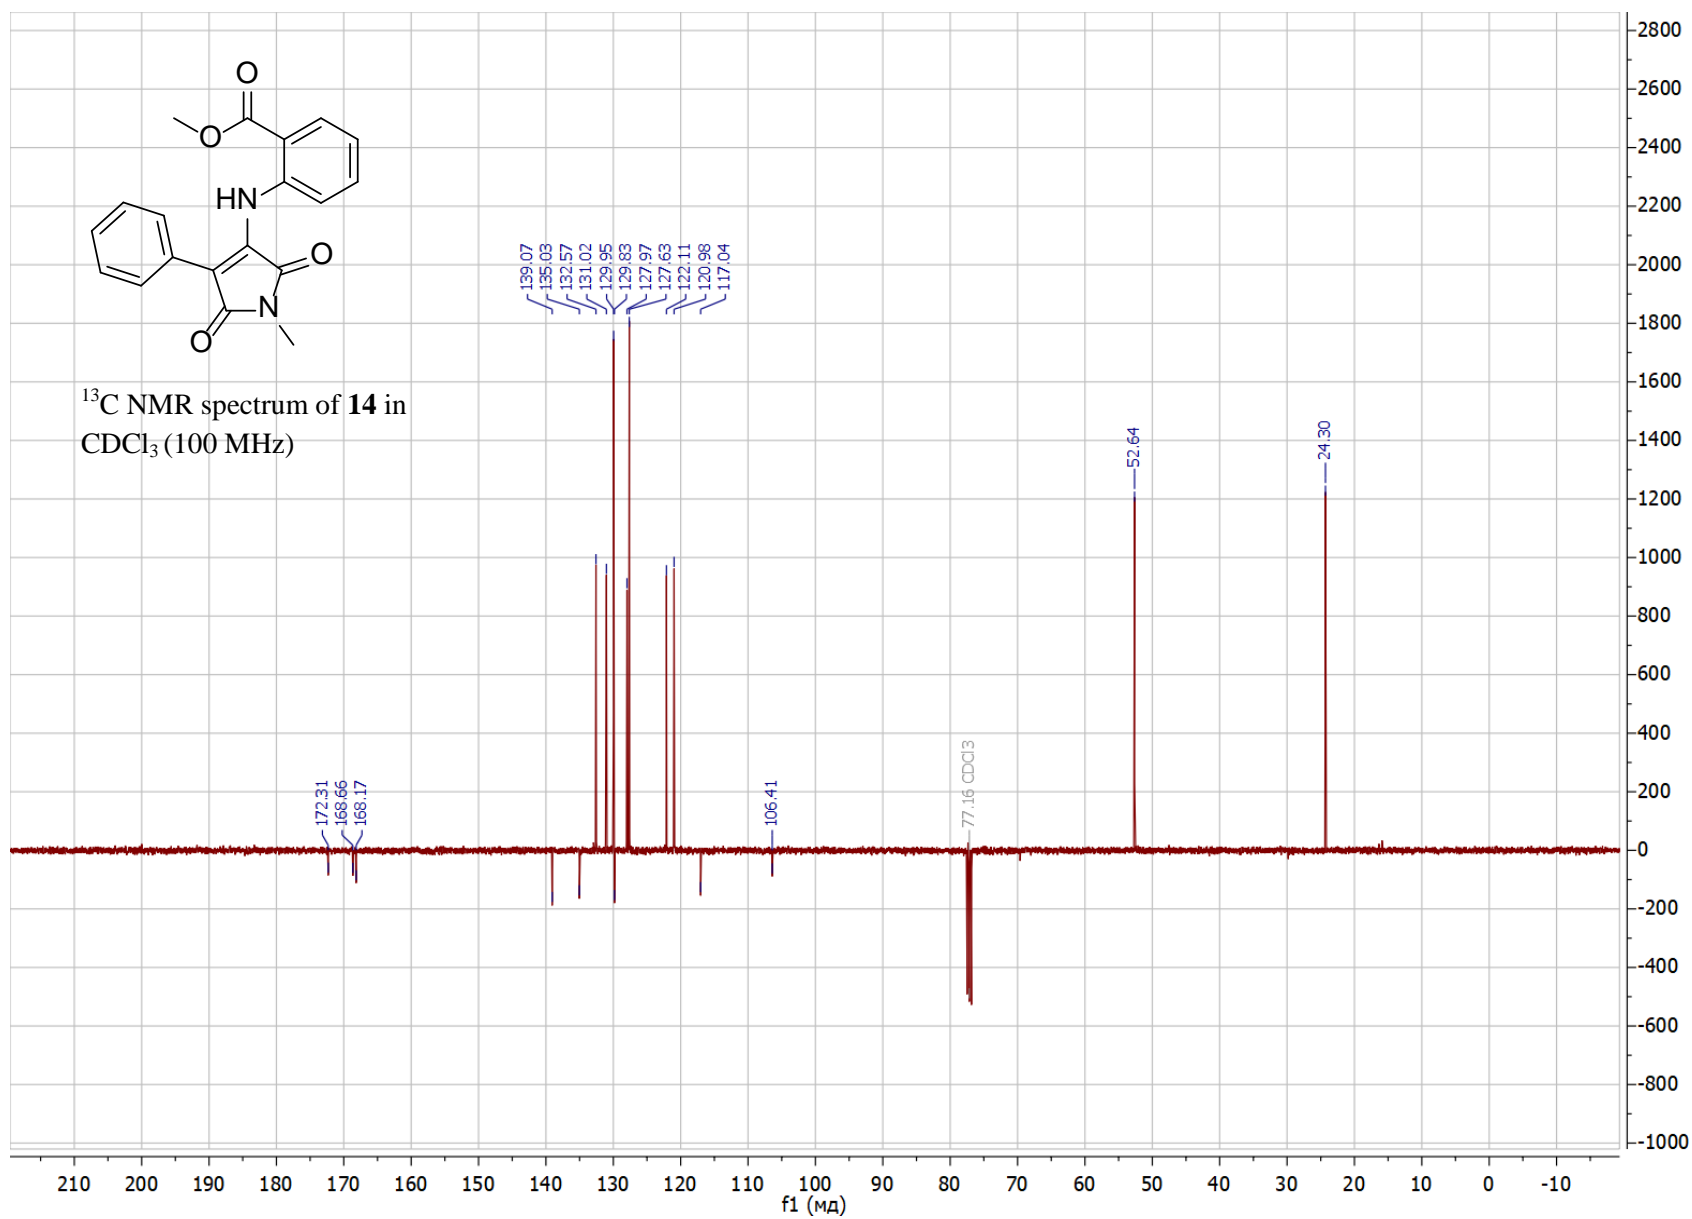



$^1\text{H}$  and  $^{13}\text{C}$  Spectral Charts for 3-(4-chlorophenyl)-4-(phenylamino)-1*H*-pyrrole-2,5-dione (**15**)

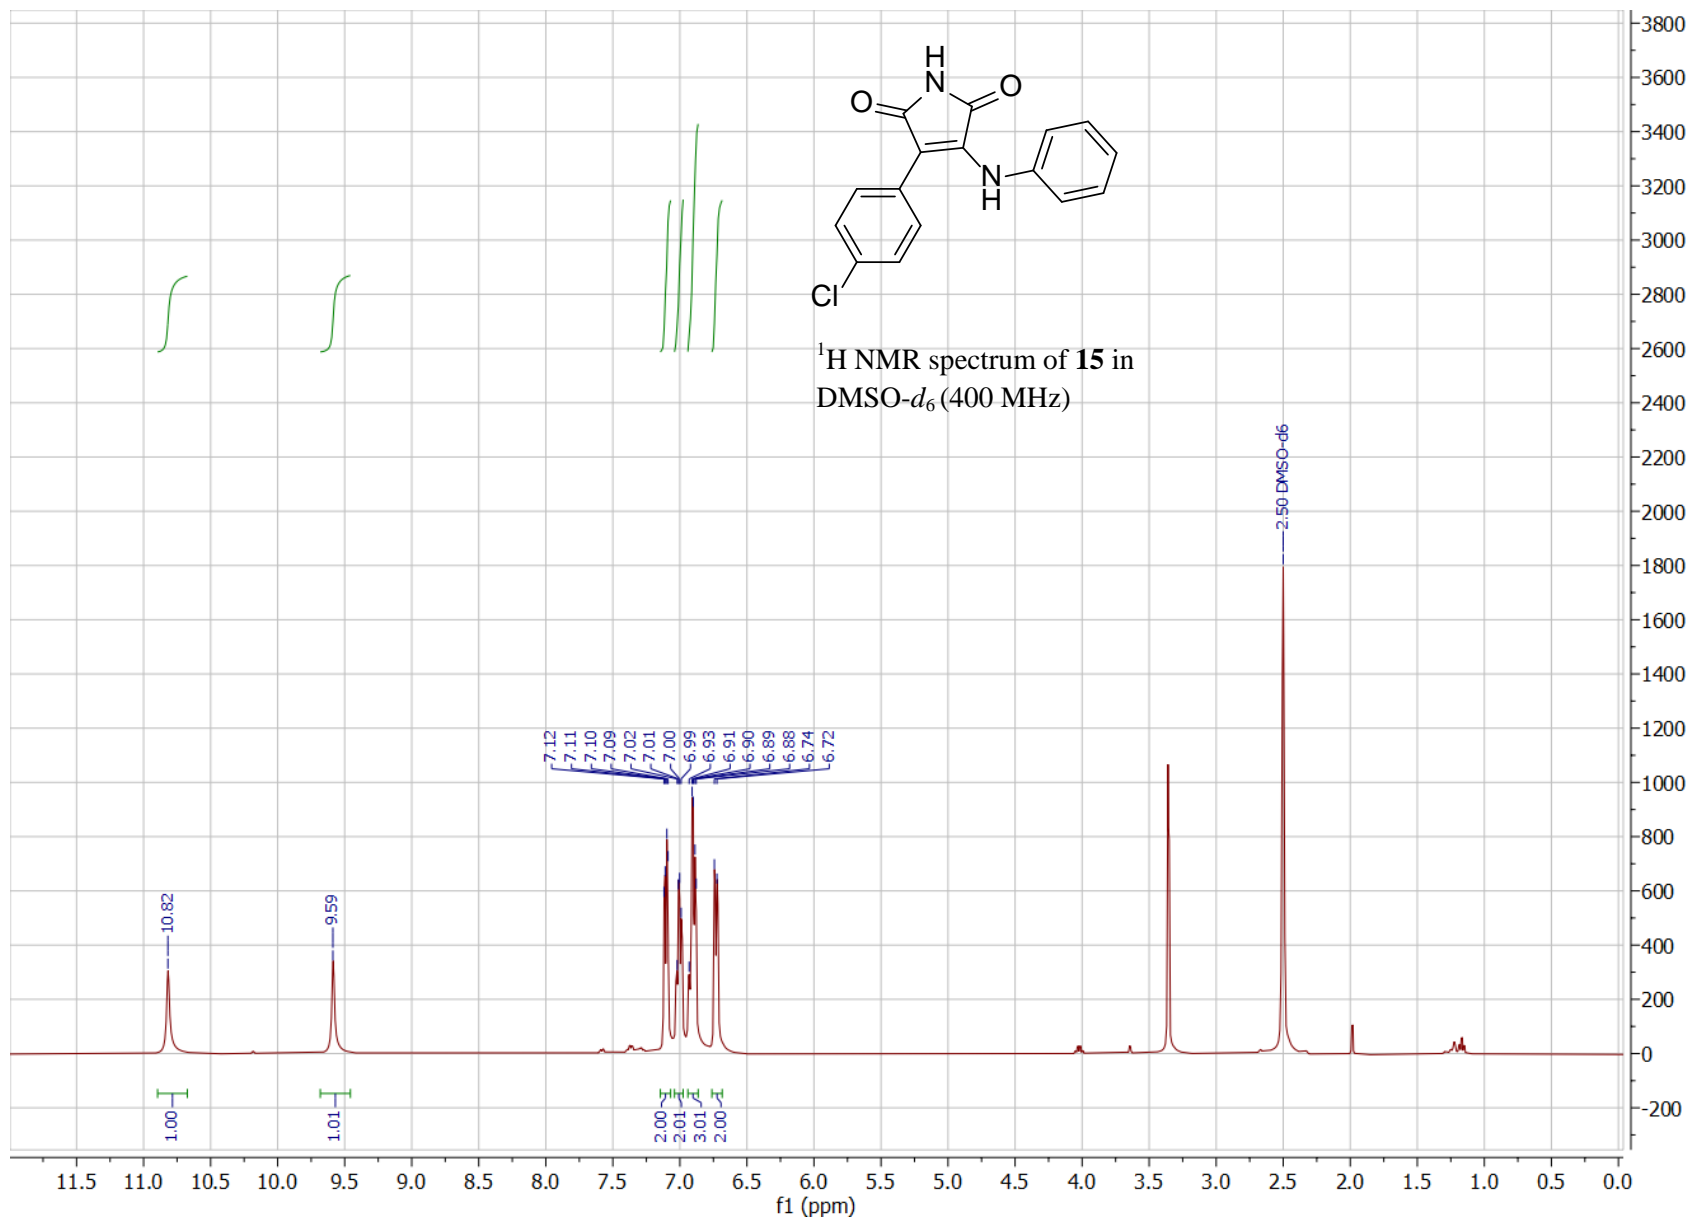

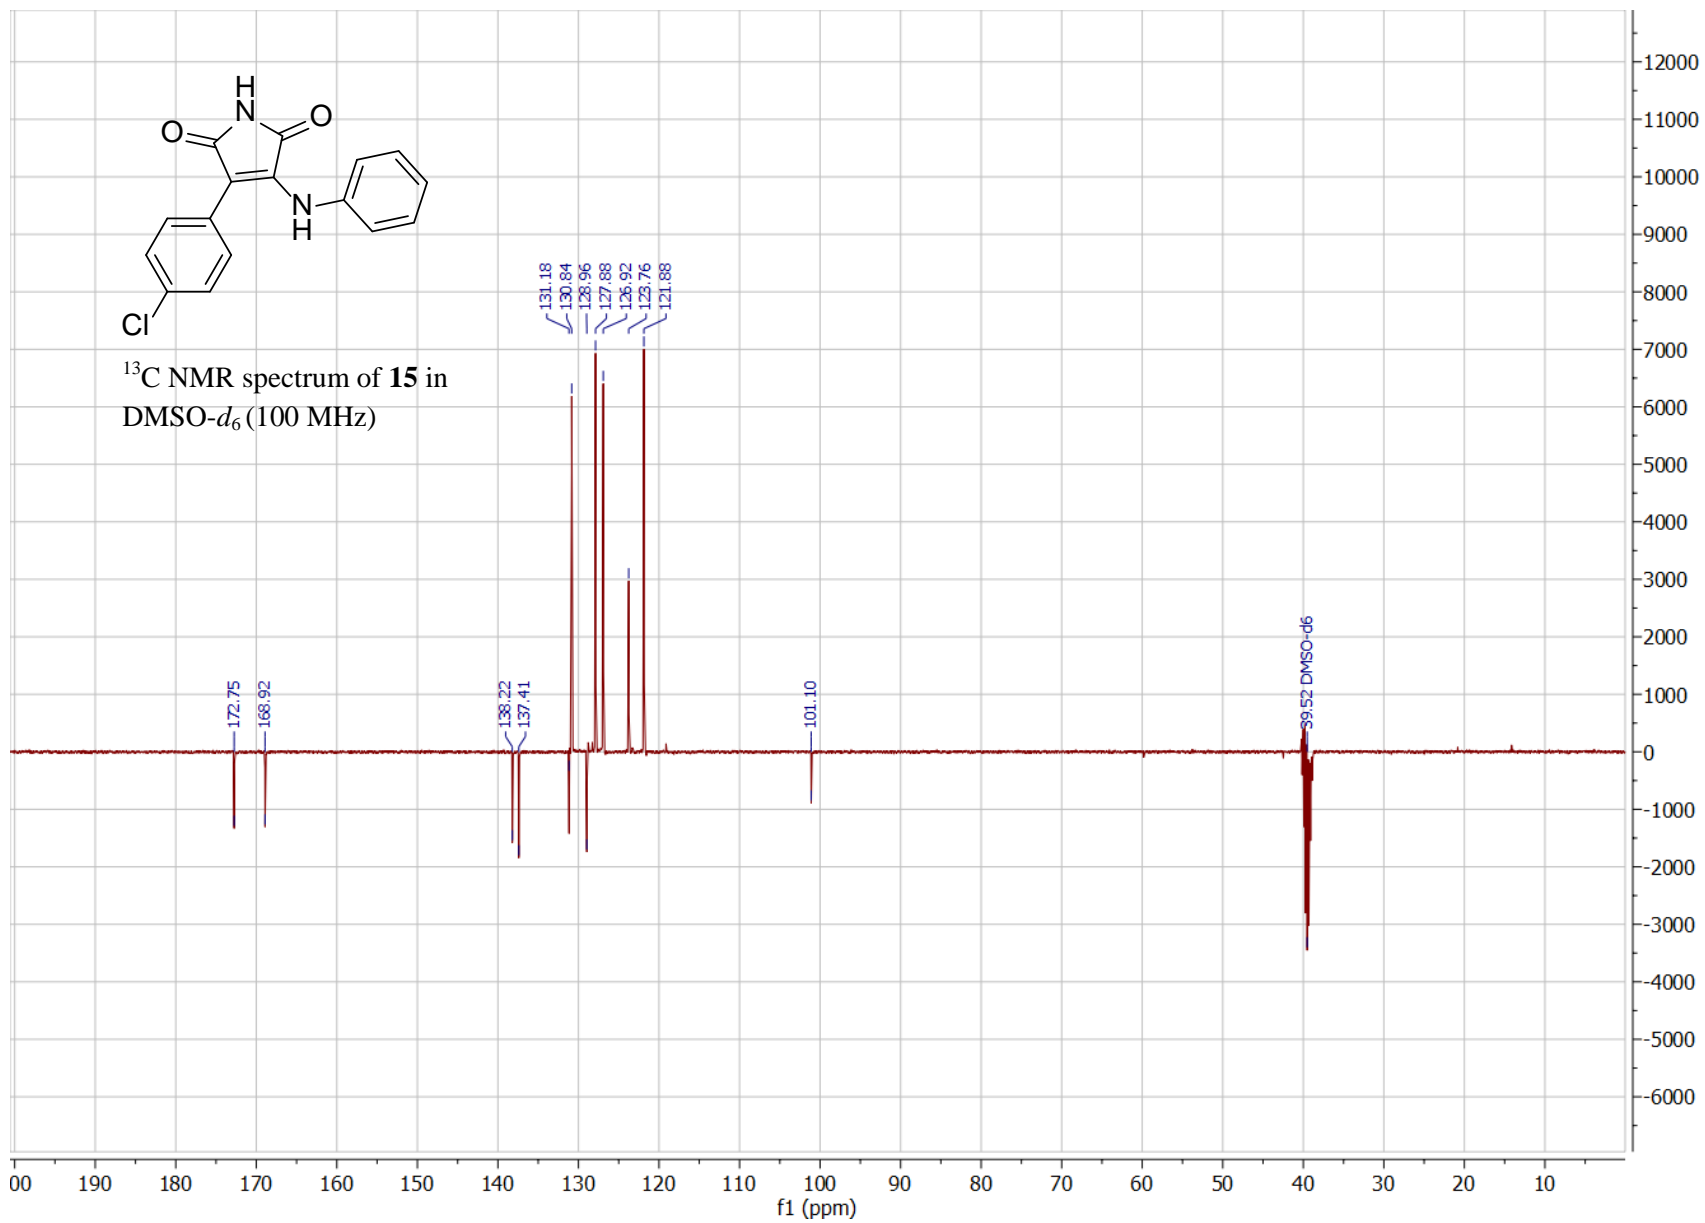

X-Ray Crystallography data for 2-((2,5-dioxo-4-aryl-2,5-dihydro-1H-pyrrol-3-yl)amino)benzoic acid (**4a**)

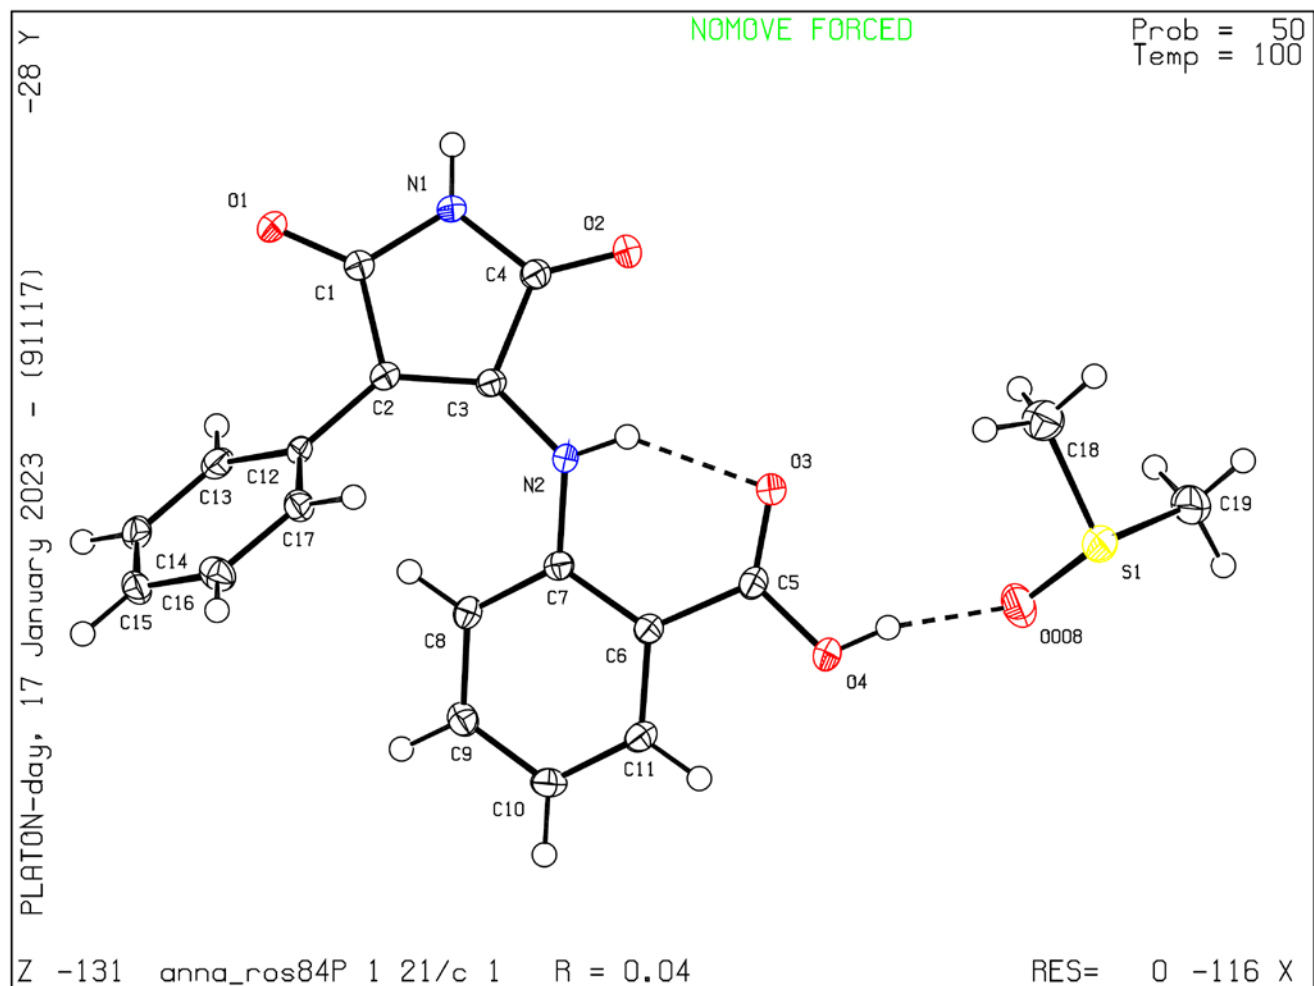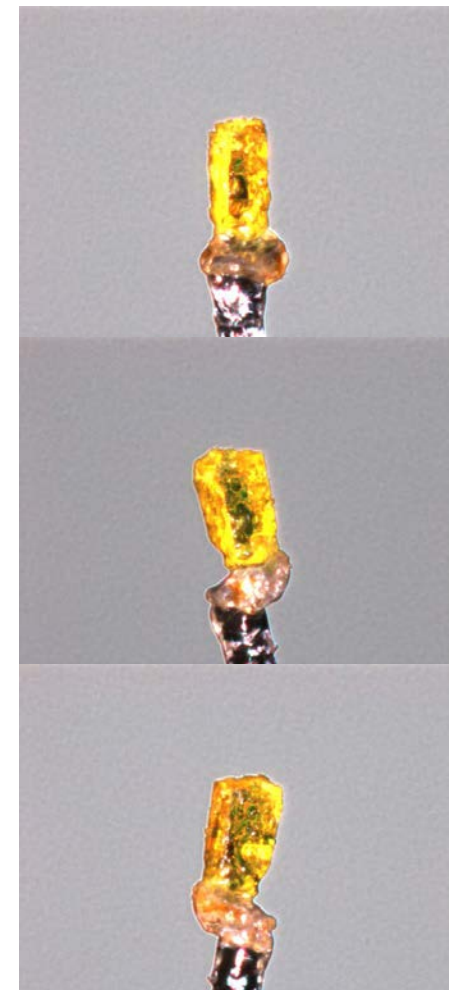

**Figure S1.** ORTEP drawing of the crystal structure showing 50% probability thermal ellipsoids (left, CCDC 2236719) and microphotography of the single crystal (right) of compound **4a** used for X-Ray diffraction analysis at the bottom.

**Table S1 Crystal data and structure refinement for 4a.**

|                                             |                                                                 |
|---------------------------------------------|-----------------------------------------------------------------|
| Identification code                         | ANNA_ROS845_YELLOW_2                                            |
| Empirical formula                           | C <sub>19</sub> H <sub>18</sub> N <sub>2</sub> O <sub>5</sub> S |
| Formula weight                              | 386.41                                                          |
| Temperature/K                               | 100.01(10)                                                      |
| Crystal system                              | monoclinic                                                      |
| Space group                                 | P2 <sub>1</sub> /c                                              |
| a/Å                                         | 9.71100(10)                                                     |
| b/Å                                         | 8.91200(10)                                                     |
| c/Å                                         | 20.7791(2)                                                      |
| α/°                                         | 90                                                              |
| β/°                                         | 99.2150(10)                                                     |
| γ/°                                         | 90                                                              |
| Volume/Å <sup>3</sup>                       | 1775.11(3)                                                      |
| Z                                           | 4                                                               |
| ρ <sub>calc</sub> /cm <sup>3</sup>          | 1.446                                                           |
| μ/mm <sup>-1</sup>                          | 1.928                                                           |
| F(000)                                      | 808.0                                                           |
| Crystal size/mm <sup>3</sup>                | 0.339 × 0.178 × 0.15                                            |
| Radiation                                   | synchrotron (λ = 1.54184)                                       |
| 2θ range for data collection/°              | 8.622 to 152.264                                                |
| Index ranges                                | -12 ≤ h ≤ 12, -11 ≤ k ≤ 7, -26 ≤ l ≤ 25                         |
| Reflections collected                       | 19149                                                           |
| Independent reflections                     | 3715 [R <sub>int</sub> = 0.0225, R <sub>sigma</sub> = 0.0149]   |
| Data/restraints/parameters                  | 3715/0/258                                                      |
| Goodness-of-fit on F <sup>2</sup>           | 1.039                                                           |
| Final R indexes [I >= 2σ (I)]               | R <sub>1</sub> = 0.0393, wR <sub>2</sub> = 0.1051               |
| Final R indexes [all data]                  | R <sub>1</sub> = 0.0403, wR <sub>2</sub> = 0.1059               |
| Largest diff. peak/hole / e Å <sup>-3</sup> | 0.36/-0.64                                                      |

**Table S2 Fractional Atomic Coordinates ( $\times 10^4$ ) and Equivalent Isotropic Displacement Parameters ( $\text{\AA}^2 \times 10^3$ ) for 4a.  $U_{\text{eq}}$  is defined as 1/3 of of the trace of the orthogonalised  $U_{\text{H}}$  tensor.**

| Atom | x          | y          | z         | $U(\text{eq})$ |
|------|------------|------------|-----------|----------------|
| S1   | 537.6(4)   | 8138.9(5)  | 7348.9(2) | 27.45(13)      |
| O2   | 6769.5(11) | 9343.0(12) | 5950.3(5) | 18.8(2)        |
| O1   | 9174.7(11) | 9161.8(14) | 4238.5(5) | 22.1(3)        |
| O3   | 3249.0(12) | 7963.7(13) | 5912.4(5) | 21.9(3)        |
| O4   | 1241.4(13) | 6686.9(16) | 5722.9(6) | 27.9(3)        |
| N2   | 4919.3(13) | 7821.8(14) | 5005.1(6) | 14.8(3)        |
| N1   | 8283.1(14) | 9468.4(16) | 5196.1(6) | 19.2(3)        |
| O008 | 832.2(17)  | 6864.7(16) | 6912.3(7) | 38.4(4)        |
| C3   | 6159.7(15) | 8309.3(16) | 4855.7(7) | 14.5(3)        |
| C7   | 4028.6(15) | 6691.5(16) | 4720.5(7) | 14.3(3)        |
| C12  | 6478.3(15) | 7833.6(16) | 3647.2(7) | 14.8(3)        |
| C4   | 7066.9(15) | 9102.4(17) | 5416.0(7) | 15.9(3)        |
| C8   | 4373.9(15) | 5785.9(16) | 4220.4(7) | 15.8(3)        |
| C6   | 2782.2(15) | 6381.8(17) | 4969.5(7) | 15.9(3)        |
| C17  | 5284.1(16) | 8414.8(17) | 3267.8(7) | 17.3(3)        |
| C9   | 3484.9(16) | 4661.2(17) | 3947.5(7) | 18.0(3)        |
| C5   | 2461.0(16) | 7107.2(18) | 5573.4(7) | 18.0(3)        |
| C10  | 2221.7(16) | 4403.8(18) | 4163.5(8) | 19.9(3)        |
| C2   | 6853.9(15) | 8284.4(17) | 4336.4(7) | 15.4(3)        |
| C11  | 1899.1(16) | 5243.9(18) | 4677.6(8) | 19.2(3)        |
| C1   | 8225.9(16) | 8991.2(18) | 4555.3(7) | 17.6(3)        |
| C16  | 4943.4(18) | 8014.5(17) | 2613.2(8) | 20.8(3)        |
| C15  | 5784.0(18) | 7022.0(18) | 2338.1(8) | 21.3(3)        |
| C14  | 6974.3(17) | 6438.9(18) | 2713.0(8) | 21.7(3)        |
| C13  | 7330.0(16) | 6845.4(17) | 3364.8(8) | 19.2(3)        |
| C18  | 1875.2(19) | 9489(2)    | 7327.9(9) | 28.3(4)        |
| C19  | 1071(2)    | 7428(3)    | 8154.0(9) | 39.4(5)        |

**Table S3 Anisotropic Displacement Parameters ( $\text{\AA}^2 \times 10^3$ ) for 4a. The Anisotropic displacement factor exponent takes the form: -  $2\pi^2[h^2a^*U_{11}+2hka^*b^*U_{12}+\dots]$ .**

| Atom | $U_{11}$ | $U_{22}$ | $U_{33}$ | $U_{23}$  | $U_{13}$ | $U_{12}$  |
|------|----------|----------|----------|-----------|----------|-----------|
| S1   | 19.6(2)  | 39.3(3)  | 24.1(2)  | -5.87(17) | 5.42(16) | -3.97(16) |
| O2   | 19.5(5)  | 23.0(5)  | 14.6(5)  | -2.8(4)   | 4.9(4)   | -2.1(4)   |
| O1   | 16.0(5)  | 32.5(6)  | 19.1(5)  | -4.4(5)   | 6.3(4)   | -7.6(5)   |
| O3   | 20.8(6)  | 27.3(6)  | 19.1(5)  | -6.9(4)   | 7.5(4)   | -6.8(5)   |
| O4   | 20.2(6)  | 43.8(7)  | 22.2(6)  | -11.4(5)  | 11.0(5)  | -11.8(5)  |
| N2   | 14.4(6)  | 17.6(6)  | 13.2(6)  | -1.8(5)   | 4.7(4)   | -2.8(5)   |
| N1   | 14.4(6)  | 27.9(7)  | 15.3(6)  | -4.9(5)   | 3.0(5)   | -7.6(5)   |
| O008 | 56.8(9)  | 37.6(8)  | 24.8(7)  | -10.0(6)  | 18.5(6)  | -17.2(7)  |
| C3   | 13.3(7)  | 14.9(6)  | 15.3(7)  | -0.2(5)   | 2.0(5)   | -1.2(5)   |
| C7   | 14.6(7)  | 14.2(6)  | 13.6(6)  | 2.2(5)    | 1.1(5)   | -0.8(5)   |
| C12  | 16.3(7)  | 15.3(7)  | 13.9(7)  | -1.2(5)   | 6.2(5)   | -4.9(5)   |
| C4   | 15.0(7)  | 16.6(7)  | 15.9(7)  | 0.2(5)    | 2.4(5)   | -0.9(5)   |
| C8   | 16.4(7)  | 15.8(7)  | 15.8(7)  | 2.3(5)    | 4.8(5)   | -0.2(5)   |
| C6   | 14.6(7)  | 18.3(7)  | 15.0(7)  | 0.0(5)    | 2.8(5)   | -1.4(5)   |
| C17  | 20.7(7)  | 15.9(7)  | 16.0(7)  | -1.4(5)   | 4.9(6)   | -1.5(6)   |
| C9   | 21.9(7)  | 16.6(7)  | 15.9(7)  | -1.0(6)   | 4.1(6)   | 0.3(6)    |
| C5   | 15.4(7)  | 22.4(7)  | 16.9(7)  | 0.3(6)    | 5.1(6)   | -1.9(6)   |
| C10  | 19.7(7)  | 19.4(7)  | 20.1(7)  | -2.6(6)   | 1.1(6)   | -4.9(6)   |
| C2   | 13.4(7)  | 17.2(7)  | 15.8(7)  | -0.6(5)   | 2.7(5)   | -2.3(5)   |
| C11  | 15.1(7)  | 22.9(8)  | 19.8(7)  | 0.3(6)    | 3.7(6)   | -4.1(6)   |
| C1   | 16.0(7)  | 21.2(7)  | 15.7(7)  | -1.7(6)   | 3.1(5)   | -2.9(6)   |
| C16  | 27.7(8)  | 18.2(7)  | 15.6(7)  | 1.5(6)    | 0.5(6)   | -2.2(6)   |
| C15  | 32.7(9)  | 18.3(7)  | 14.5(7)  | -2.9(6)   | 8.3(6)   | -8.6(6)   |
| C14  | 23.9(8)  | 19.6(7)  | 24.7(8)  | -7.4(6)   | 13.1(6)  | -6.1(6)   |
| C13  | 15.5(7)  | 19.7(7)  | 23.5(8)  | -2.8(6)   | 6.7(6)   | -2.9(6)   |
| C18  | 32.1(9)  | 25.2(8)  | 27.1(9)  | 3.0(7)    | 3.6(7)   | -2.8(7)   |
| C19  | 51.1(12) | 47.4(12) | 21.0(9)  | -3.3(8)   | 9.4(8)   | -25.0(10) |

**Table S4 Bond Lengths for 4a.**

| Atom | Atom | Length/Å   | Atom | Atom | Length/Å |
|------|------|------------|------|------|----------|
| S1   | O008 | 1.5092(14) | C7   | C6   | 1.418(2) |
| S1   | C18  | 1.7765(19) | C12  | C17  | 1.394(2) |
| S1   | C19  | 1.786(2)   | C12  | C2   | 1.476(2) |
| O2   | C4   | 1.2101(19) | C12  | C13  | 1.400(2) |
| O1   | C1   | 1.2246(19) | C8   | C9   | 1.384(2) |
| O3   | C5   | 1.2214(19) | C6   | C5   | 1.488(2) |
| O4   | C5   | 1.3256(19) | C6   | C11  | 1.402(2) |
| N2   | C3   | 1.3624(19) | C17  | C16  | 1.394(2) |
| N2   | C7   | 1.3960(19) | C9   | C10  | 1.391(2) |
| N1   | C4   | 1.3722(19) | C10  | C11  | 1.381(2) |
| N1   | C1   | 1.3906(19) | C2   | C1   | 1.478(2) |
| C3   | C4   | 1.517(2)   | C16  | C15  | 1.387(2) |
| C3   | C2   | 1.361(2)   | C15  | C14  | 1.387(2) |
| C7   | C8   | 1.398(2)   | C14  | C13  | 1.391(2) |

**Table S5 Bond Angles for 4a.**

| Atom | Atom | Atom | Angle/°    | Atom | Atom | Atom | Angle/°    |
|------|------|------|------------|------|------|------|------------|
| O008 | S1   | C18  | 106.57(9)  | C11  | C6   | C7   | 118.81(14) |
| O008 | S1   | C19  | 103.99(10) | C11  | C6   | C5   | 118.86(13) |
| C18  | S1   | C19  | 99.20(9)   | C12  | C17  | C16  | 120.20(14) |
| C3   | N2   | C7   | 130.10(13) | C8   | C9   | C10  | 120.78(14) |
| C4   | N1   | C1   | 109.98(12) | O3   | C5   | O4   | 122.84(14) |
| N2   | C3   | C4   | 113.55(13) | O3   | C5   | C6   | 124.13(14) |
| C2   | C3   | N2   | 138.06(14) | O4   | C5   | C6   | 112.99(13) |
| C2   | C3   | C4   | 108.39(12) | C11  | C10  | C9   | 118.76(14) |
| N2   | C7   | C8   | 121.68(13) | C3   | C2   | C12  | 134.18(14) |
| N2   | C7   | C6   | 119.55(13) | C3   | C2   | C1   | 106.60(13) |
| C8   | C7   | C6   | 118.64(13) | C12  | C2   | C1   | 119.02(13) |

**Table S5 Bond Angles for 4a.**

| Atom | Atom | Atom | Angle/°    | Atom | Atom | Atom | Angle/°    |
|------|------|------|------------|------|------|------|------------|
| C17  | C12  | C2   | 120.12(13) | C10  | C11  | C6   | 121.87(14) |
| C17  | C12  | C13  | 119.38(14) | O1   | C1   | N1   | 123.96(14) |
| C13  | C12  | C2   | 120.48(14) | O1   | C1   | C2   | 127.32(14) |
| O2   | C4   | N1   | 127.44(14) | N1   | C1   | C2   | 108.71(12) |
| O2   | C4   | C3   | 126.29(14) | C15  | C16  | C17  | 120.13(15) |
| N1   | C4   | C3   | 106.27(12) | C14  | C15  | C16  | 119.98(14) |
| C9   | C8   | C7   | 120.97(14) | C15  | C14  | C13  | 120.25(15) |
| C7   | C6   | C5   | 121.98(13) | C14  | C13  | C12  | 120.05(15) |

**Table S6 Torsion Angles for 4a.**

| A  | B  | C  | D   | Angle/°    | A   | B   | C   | D   | Angle/°    |
|----|----|----|-----|------------|-----|-----|-----|-----|------------|
| N2 | C3 | C4 | O2  | -1.5(2)    | C8  | C7  | C6  | C5  | 169.08(14) |
| N2 | C3 | C4 | N1  | 177.83(13) | C8  | C7  | C6  | C11 | -4.1(2)    |
| N2 | C3 | C2 | C12 | 8.4(3)     | C8  | C9  | C10 | C11 | -3.1(2)    |
| N2 | C3 | C2 | C1  | 177.02(17) | C6  | C7  | C8  | C9  | 3.5(2)     |
| N2 | C7 | C8 | C9  | 179.41(13) | C17 | C12 | C2  | C3  | 52.2(2)    |
| N2 | C7 | C6 | C5  | -6.9(2)    | C17 | C12 | C2  | C1  | 121.90(16) |
| N2 | C7 | C6 | C11 | 179.95(13) | C17 | C12 | C13 | C14 | -0.7(2)    |
| C3 | N2 | C7 | C8  | 3.7(2)     | C17 | C16 | C15 | C14 | -0.7(2)    |
| C3 | N2 | C7 | C6  | 179.54(14) | C9  | C10 | C11 | C6  | 2.5(2)     |
| C3 | C2 | C1 | O1  | 178.41(16) | C5  | C6  | C11 | C10 | 172.24(15) |
| C3 | C2 | C1 | N1  | -2.22(18)  | C2  | C3  | C4  | O2  | 178.98(15) |
| C7 | N2 | C3 | C4  | 157.52(14) | C2  | C3  | C4  | N1  | -1.70(17)  |
| C7 | N2 | C3 | C2  | 21.8(3)    | C2  | C12 | C17 | C16 | 178.66(14) |
| C7 | C8 | C9 | C10 | 0.1(2)     | C2  | C12 | C13 | C14 | -          |



**Table S6 Torsion Angles for 4a.**

| A   | B   | C   | D   | Angle/°    | A   | B   | C   | D   | Angle/°    |
|-----|-----|-----|-----|------------|-----|-----|-----|-----|------------|
|     |     |     |     |            |     |     |     |     | 179.36(14) |
| C7  | C6  | C5  | O3  | -3.0(2)    | C11 | C6  | C5  | O3  | 170.11(15) |
| C7  | C6  | C5  | O4  | 179.27(14) | C11 | C6  | C5  | O4  | -7.6(2)    |
| C7  | C6  | C11 | C10 | 1.1(2)     | C1  | N1  | C4  | O2  | 179.57(15) |
| C12 | C17 | C16 | C15 | 0.7(2)     | C1  | N1  | C4  | C3  | 0.26(17)   |
| C12 | C2  | C1  | O1  | -6.0(2)    | C16 | C15 | C14 | C13 | 0.0(2)     |
| C12 | C2  | C1  | N1  | 173.37(13) | C15 | C14 | C13 | C12 | 0.7(2)     |
| C4  | N1  | C1  | O1  | 179.45(15) | C13 | C12 | C17 | C16 | 0.0(2)     |
| C4  | N1  | C1  | C2  | 1.15(18)   | C13 | C12 | C2  | C3  | 129.14(18) |
| C4  | C3  | C2  | C12 | 172.30(16) | C13 | C12 | C2  | C1  | 56.8(2)    |
| C4  | C3  | C2  | C1  | 2.32(16)   |     |     |     |     |            |

**Table S7 Hydrogen Atom Coordinates ( $\text{\AA} \times 10^4$ ) and Isotropic Displacement Parameters ( $\text{\AA}^2 \times 10^3$ ) for 4a.**

| Atom | x       | y        | z       | U(eq) |
|------|---------|----------|---------|-------|
| H8   | 5213.41 | 5941.77  | 4069.08 | 19    |
| H17  | 4712.75 | 9071.79  | 3451.89 | 21    |
| H9   | 3734.87 | 4070.5   | 3615.73 | 22    |
| H10  | 1605.9  | 3679.39  | 3965.43 | 24    |
| H11  | 1072.51 | 5049.15  | 4834.72 | 23    |
| H16  | 4151.11 | 8413.49  | 2360.39 | 25    |
| H15  | 5549.51 | 6747.65  | 1902.47 | 26    |
| H14  | 7536.51 | 5773.62  | 2527.82 | 26    |
| H13  | 8134.35 | 6460.41  | 3613.07 | 23    |
| H18A | 2769.5  | 9020.31  | 7447.35 | 42    |
| H18B | 1776.11 | 10283.56 | 7629.21 | 42    |
| H18C | 1802.75 | 9894.13  | 6895.58 | 42    |

**Table S7 Hydrogen Atom Coordinates ( $\text{\AA}\times 10^4$ ) and Isotropic Displacement Parameters ( $\text{\AA}^2\times 10^3$ ) for 4a.**

| Atom | x        | y        | z        | U(eq) |
|------|----------|----------|----------|-------|
| H19A | 495.38   | 6588.39  | 8225.89  | 59    |
| H19B | 977.14   | 8200.69  | 8465.97  | 59    |
| H19C | 2027.56  | 7113.07  | 8202.85  | 59    |
| H2   | 4720(20) | 8130(20) | 5362(12) | 30(6) |
| H1   | 9000(20) | 9870(30) | 5407(11) | 31(6) |
| H4   | 1150(30) | 6960(30) | 6107(15) | 61(9) |

### Experimental

Single crystals of  $\text{C}_{19}\text{H}_{18}\text{N}_2\text{O}_5\text{S}$  4a were obtained by slow evaporation of saturated solution in EtOAc. A suitable crystal was selected and mounted on the glass stick by acrylic glue on a SuperNova, Dual, Cu at home/near, AtlasS2 diffractometer. The crystal was kept at 100.01(10) K during data collection. Using Olex2 [S1], the structure was solved with the SHELXT [S2] structure solution program using Intrinsic Phasing and refined with the SHELXL [S3] refinement package using Least Squares minimisation.

1. Dolomanov, O.V., Bourhis, L.J., Gildea, R.J., Howard, J.A.K. & Puschmann, H. (2009), *J. Appl. Cryst.* 42, 339-341.
2. Sheldrick, G.M. (2015). *Acta Cryst.* A71, 3-8.
3. Sheldrick, G.M. (2015). *Acta Cryst.* C71, 3-8.

### Crystal structure determination of 4a

**Crystal Data** for  $\text{C}_{19}\text{H}_{18}\text{N}_2\text{O}_5\text{S}$  ( $M=386.41$  g/mol): monoclinic, space group  $\text{P}2_1/c$  (no. 14),  $a = 9.71100(10)$   $\text{\AA}$ ,  $b = 8.91200(10)$   $\text{\AA}$ ,  $c = 20.7791(2)$   $\text{\AA}$ ,  $\beta = 99.2150(10)^\circ$ ,  $V = 1775.11(3)$   $\text{\AA}^3$ ,  $Z = 4$ ,  $T = 100.01(10)$  K,  $\mu(\text{synchrotron}) = 1.928$   $\text{mm}^{-1}$ ,  $D_{\text{calc}} = 1.446$   $\text{g/cm}^3$ , 19149 reflections measured ( $8.622^\circ \leq 2\theta \leq 152.264^\circ$ ), 3715 unique ( $R_{\text{int}} = 0.0225$ ,  $R_{\text{sigma}} = 0.0149$ ) which were used in all calculations. The final  $R_1$  was 0.0393 ( $I > 2\sigma(I)$ ) and  $wR_2$  was 0.1059 (all data).

### Refinement model description

Number of restraints - 0, number of constraints - unknown.

Details:

1. Fixed Uiso

At 1.2 times of:

All C(H) groups

At 1.5 times of:

All C(H,H,H) groups

2.a Aromatic/amide H refined with riding coordinates:

C8(H8), C17(H17), C9(H9), C10(H10), C11(H11), C16(H16), C15(H15), C14(H14), C13(H13)

2.b Idealised Me refined as rotating group:

C18(H18A,H18B,H18C), C19(H19A,H19B,H19C)

This report has been created with Olex2, compiled on 2020.11.12 svn.r5f609507 for OlexSys. Please [let us know](#) if there are any errors or if you would like to have additional features.

## References

---

- (S1) Dolomanov, O.V., Bourhis, L.J., Gildea, R.J, Howard, J.A.K. & Puschmann, H. OLEX2: a Complete Structure Solution, Refinement and Analysis Program. *J. Appl. Cryst.* **2009**, *42*, 339-341.
- (S2) Sheldrick, G.M. SHELXT - Integrated Space-Group and Crystal-Structure Determination. *Acta Cryst.* **2015**, *A71*, 3-8.
- (S3) Sheldrick, G.M. Crystal Structure Refinement with SHELXL. *Acta Cryst.* **2015**, *C71*, 3-8.
